# Supplementary material
Source: publisher figshare collection journal article supplement (https://diabetesjournals.figshare.com/articles/dataset/_/16810945)

Supplemental Figure 1

**A**

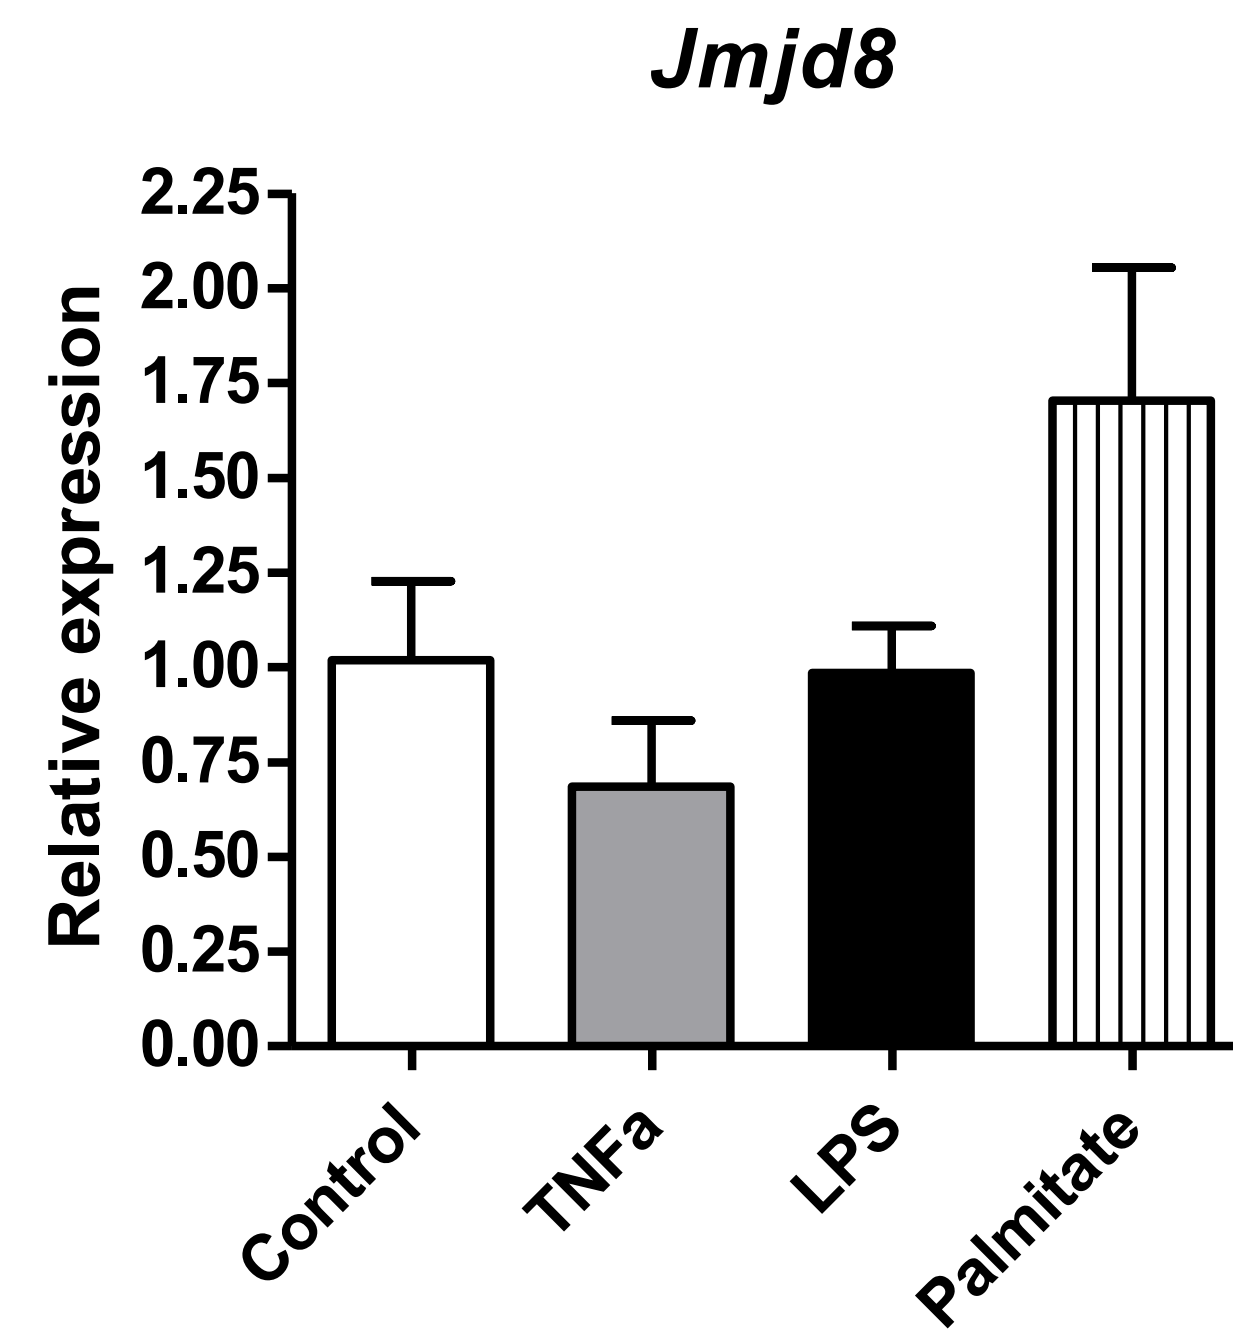

**B**

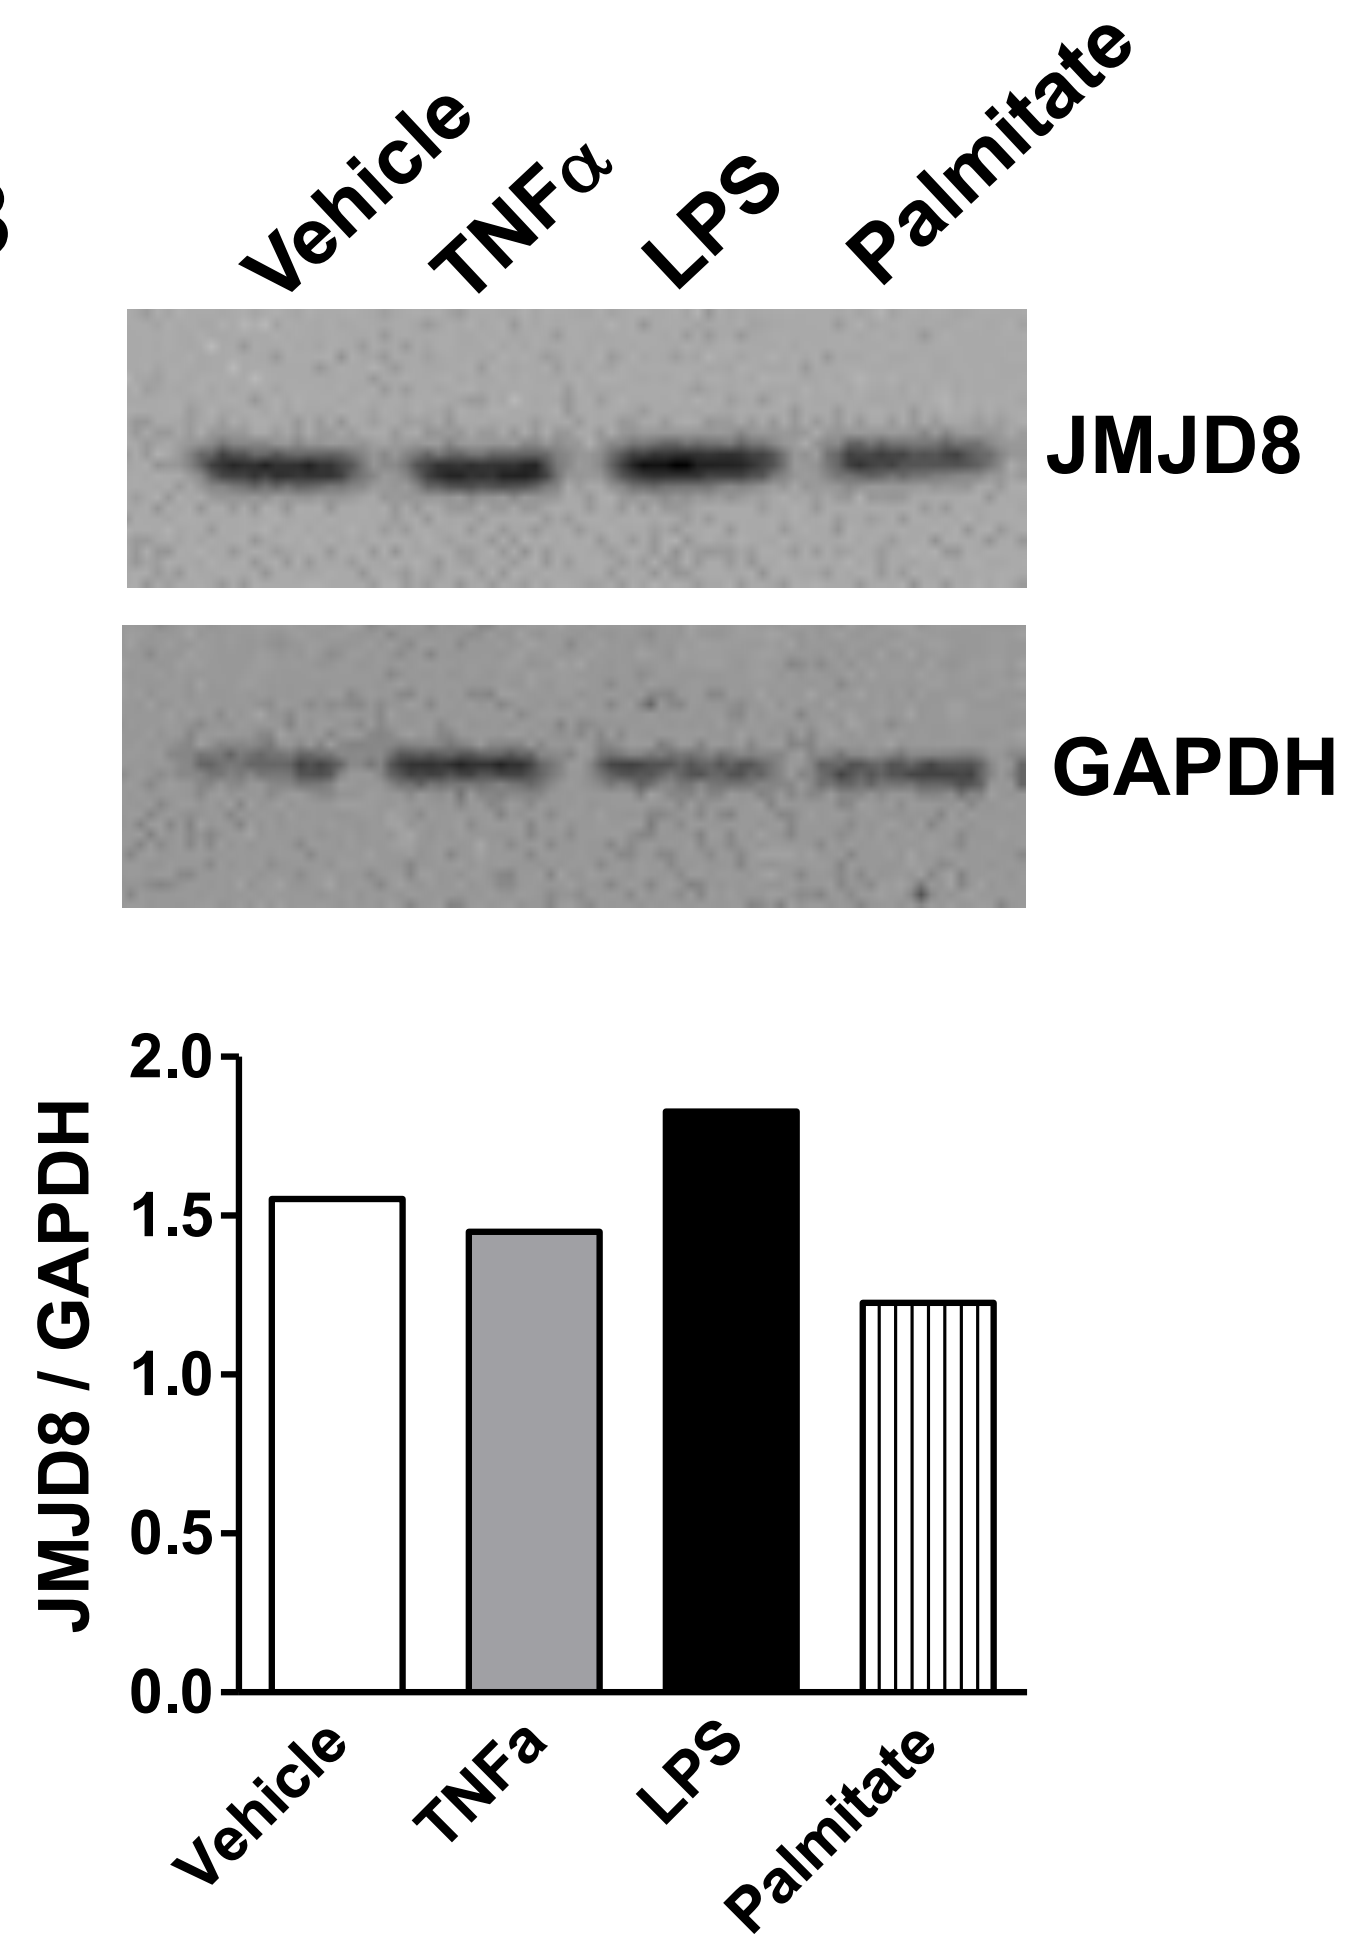

Supplemental Figure 2

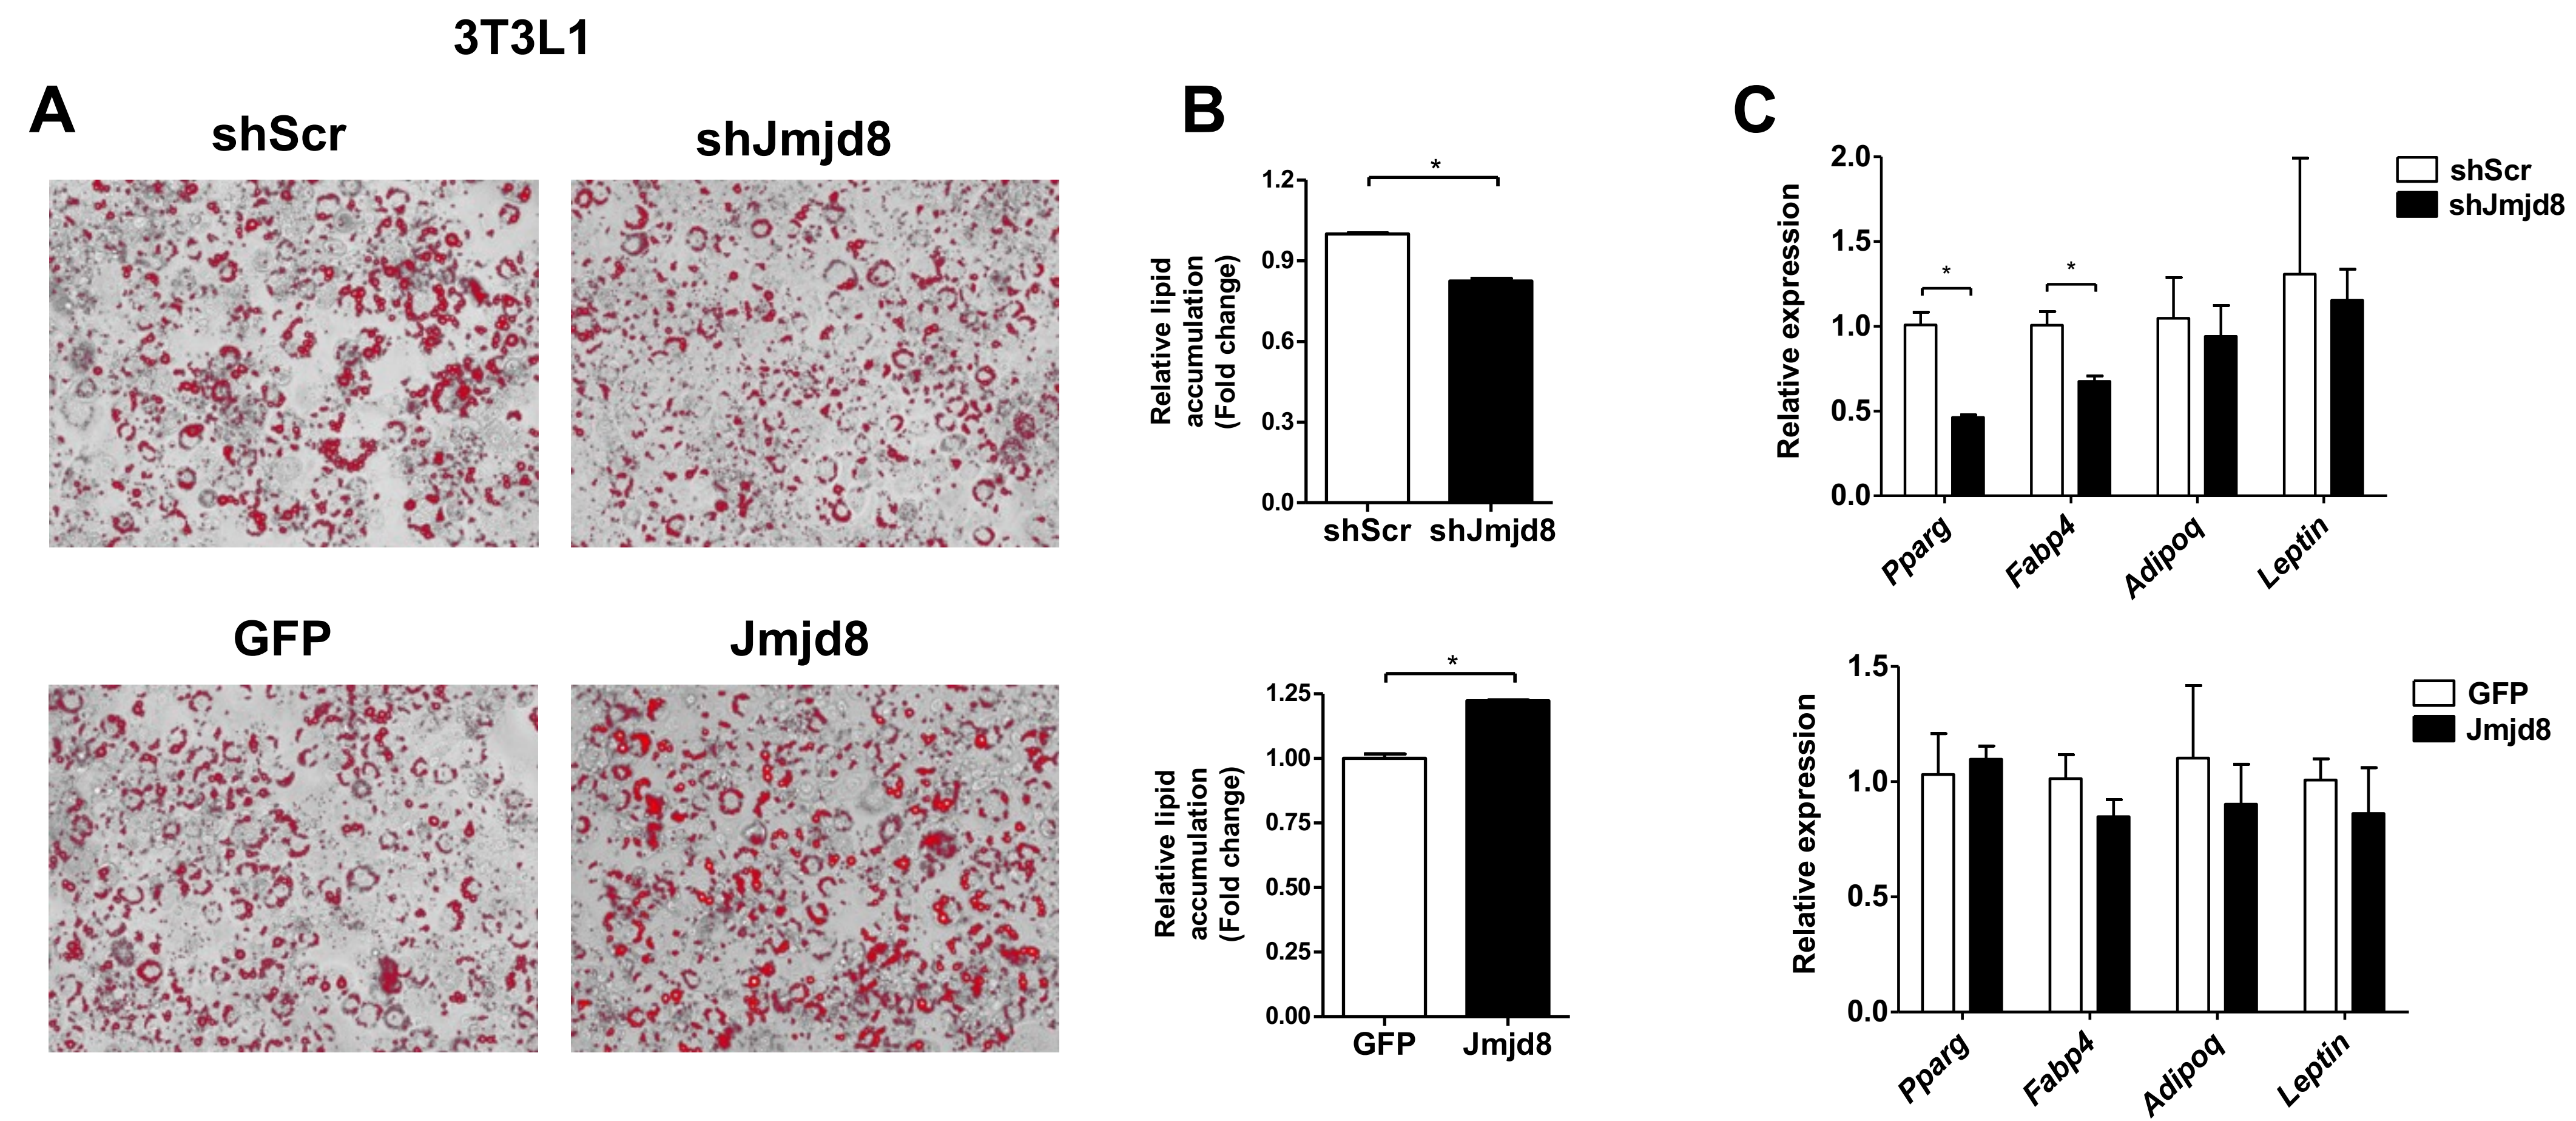



Supplemental Figure 3

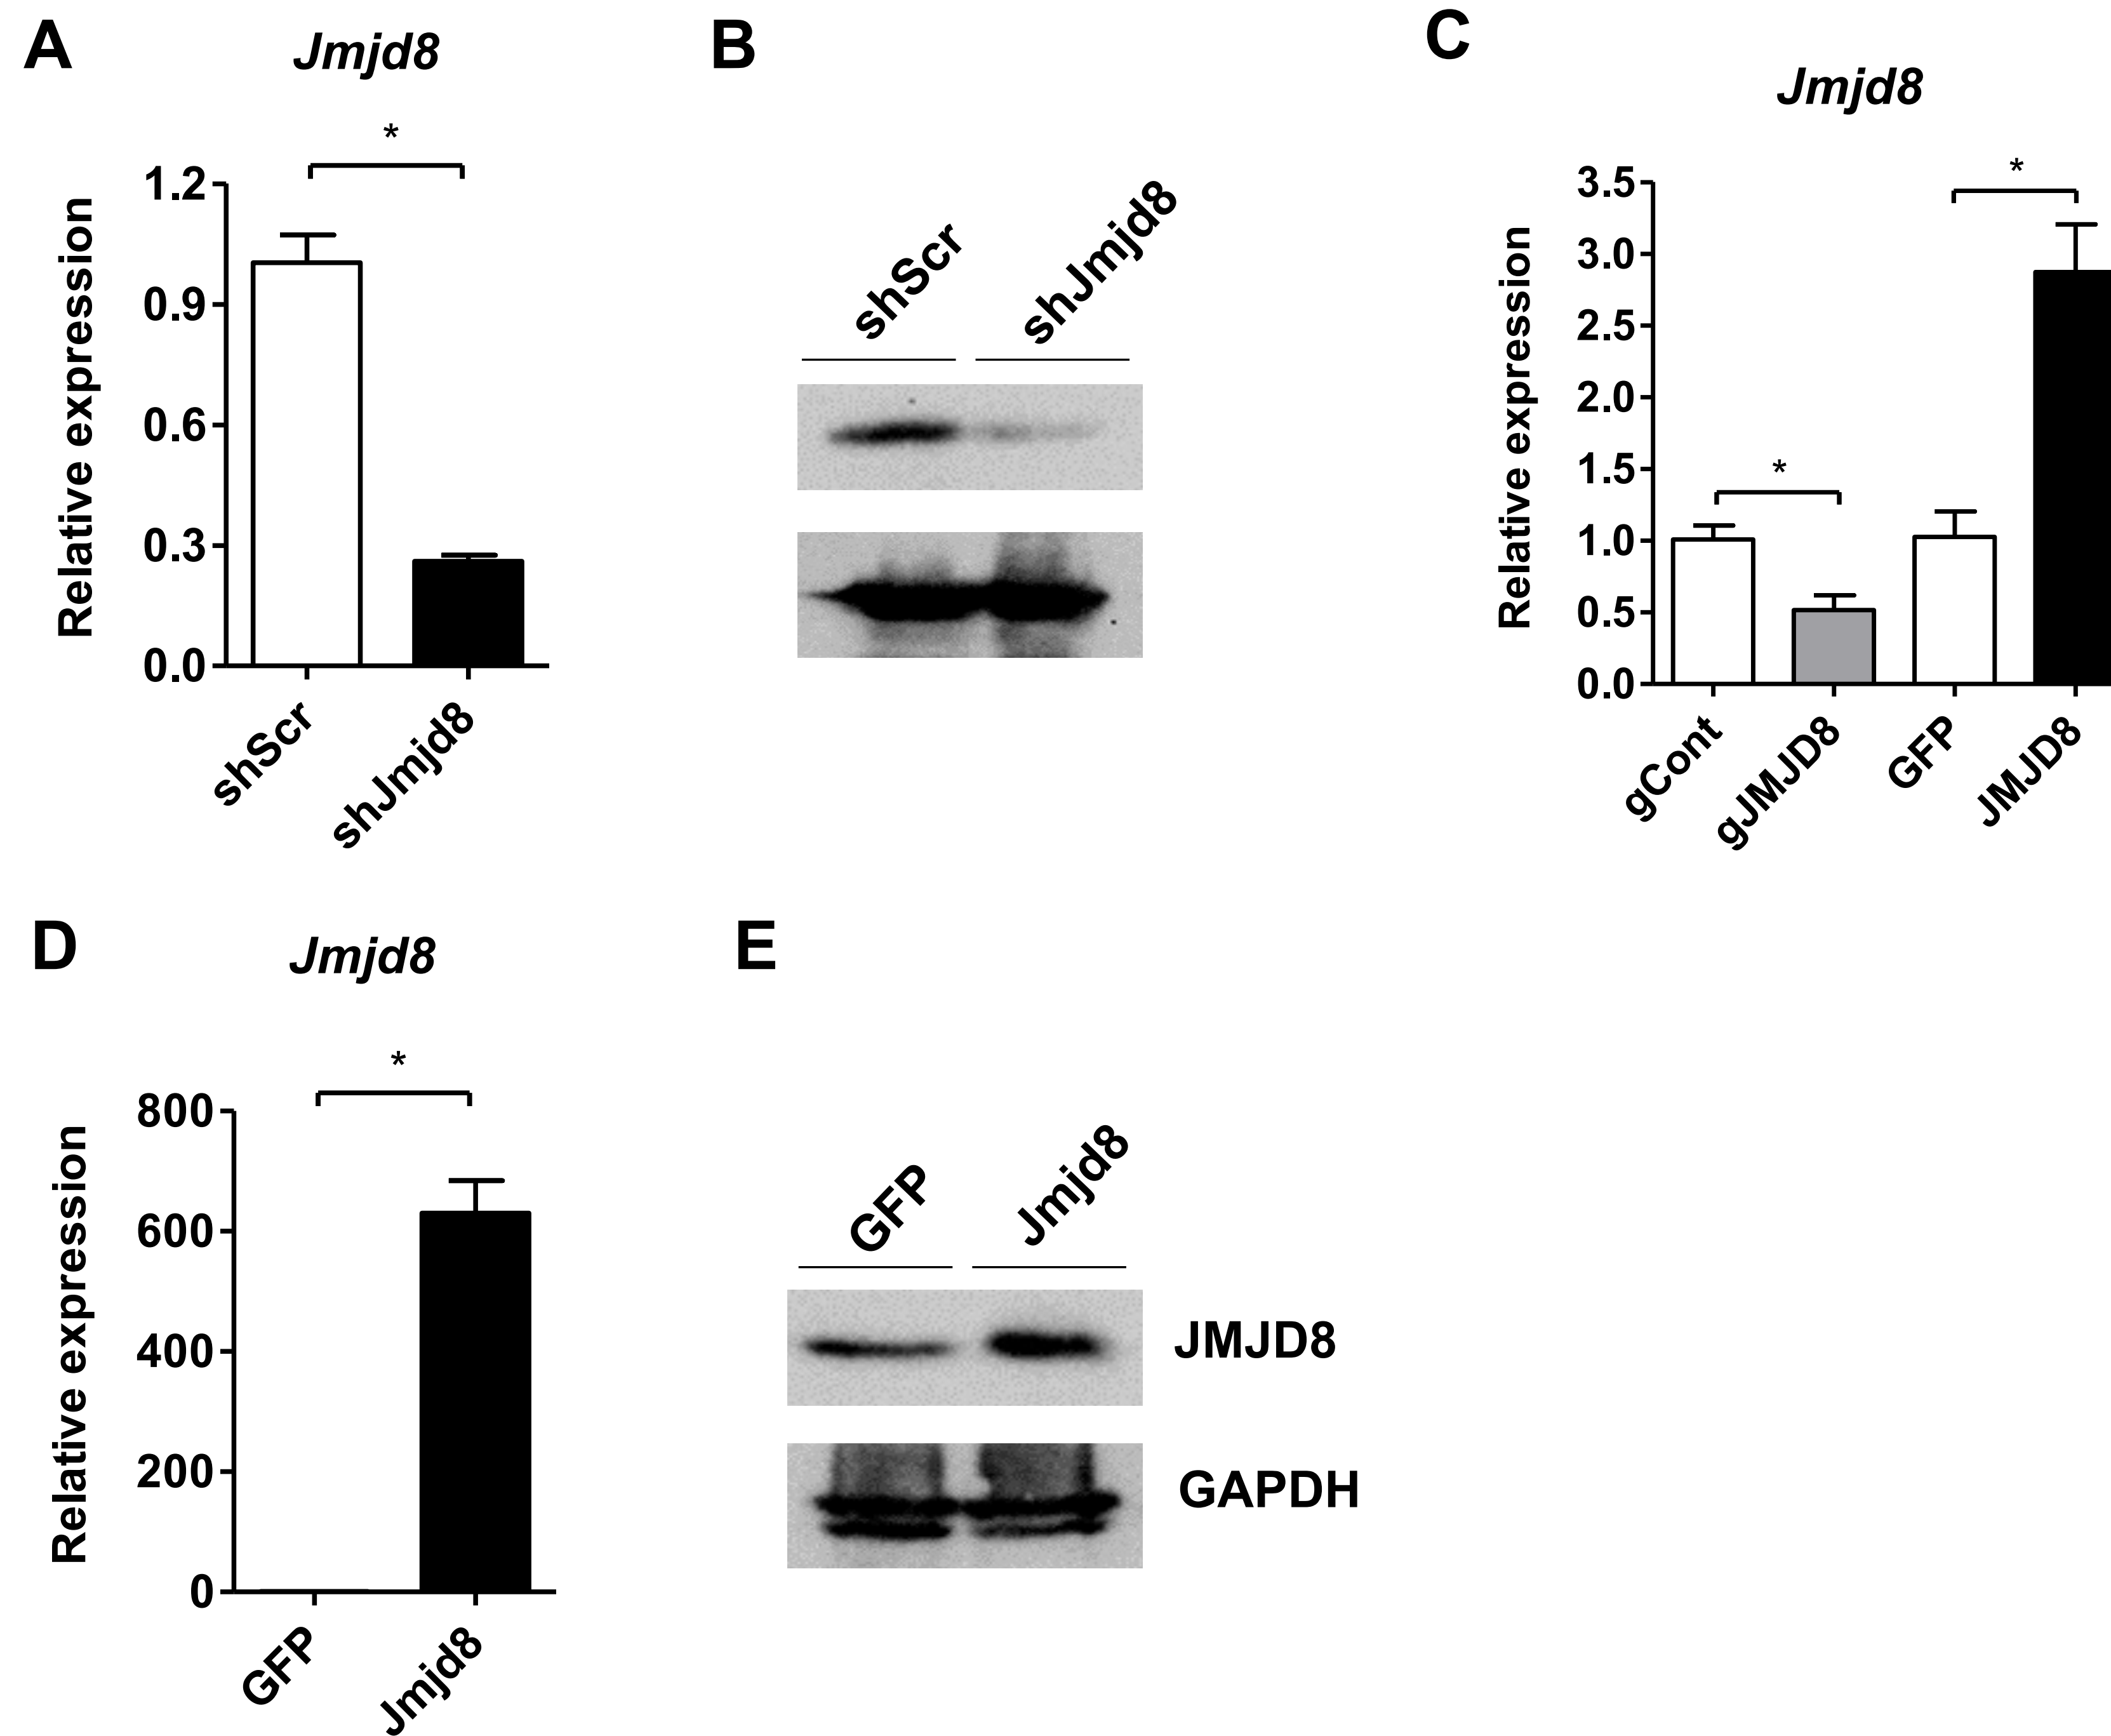

A Deletion site in the Jmjd8-KO mice

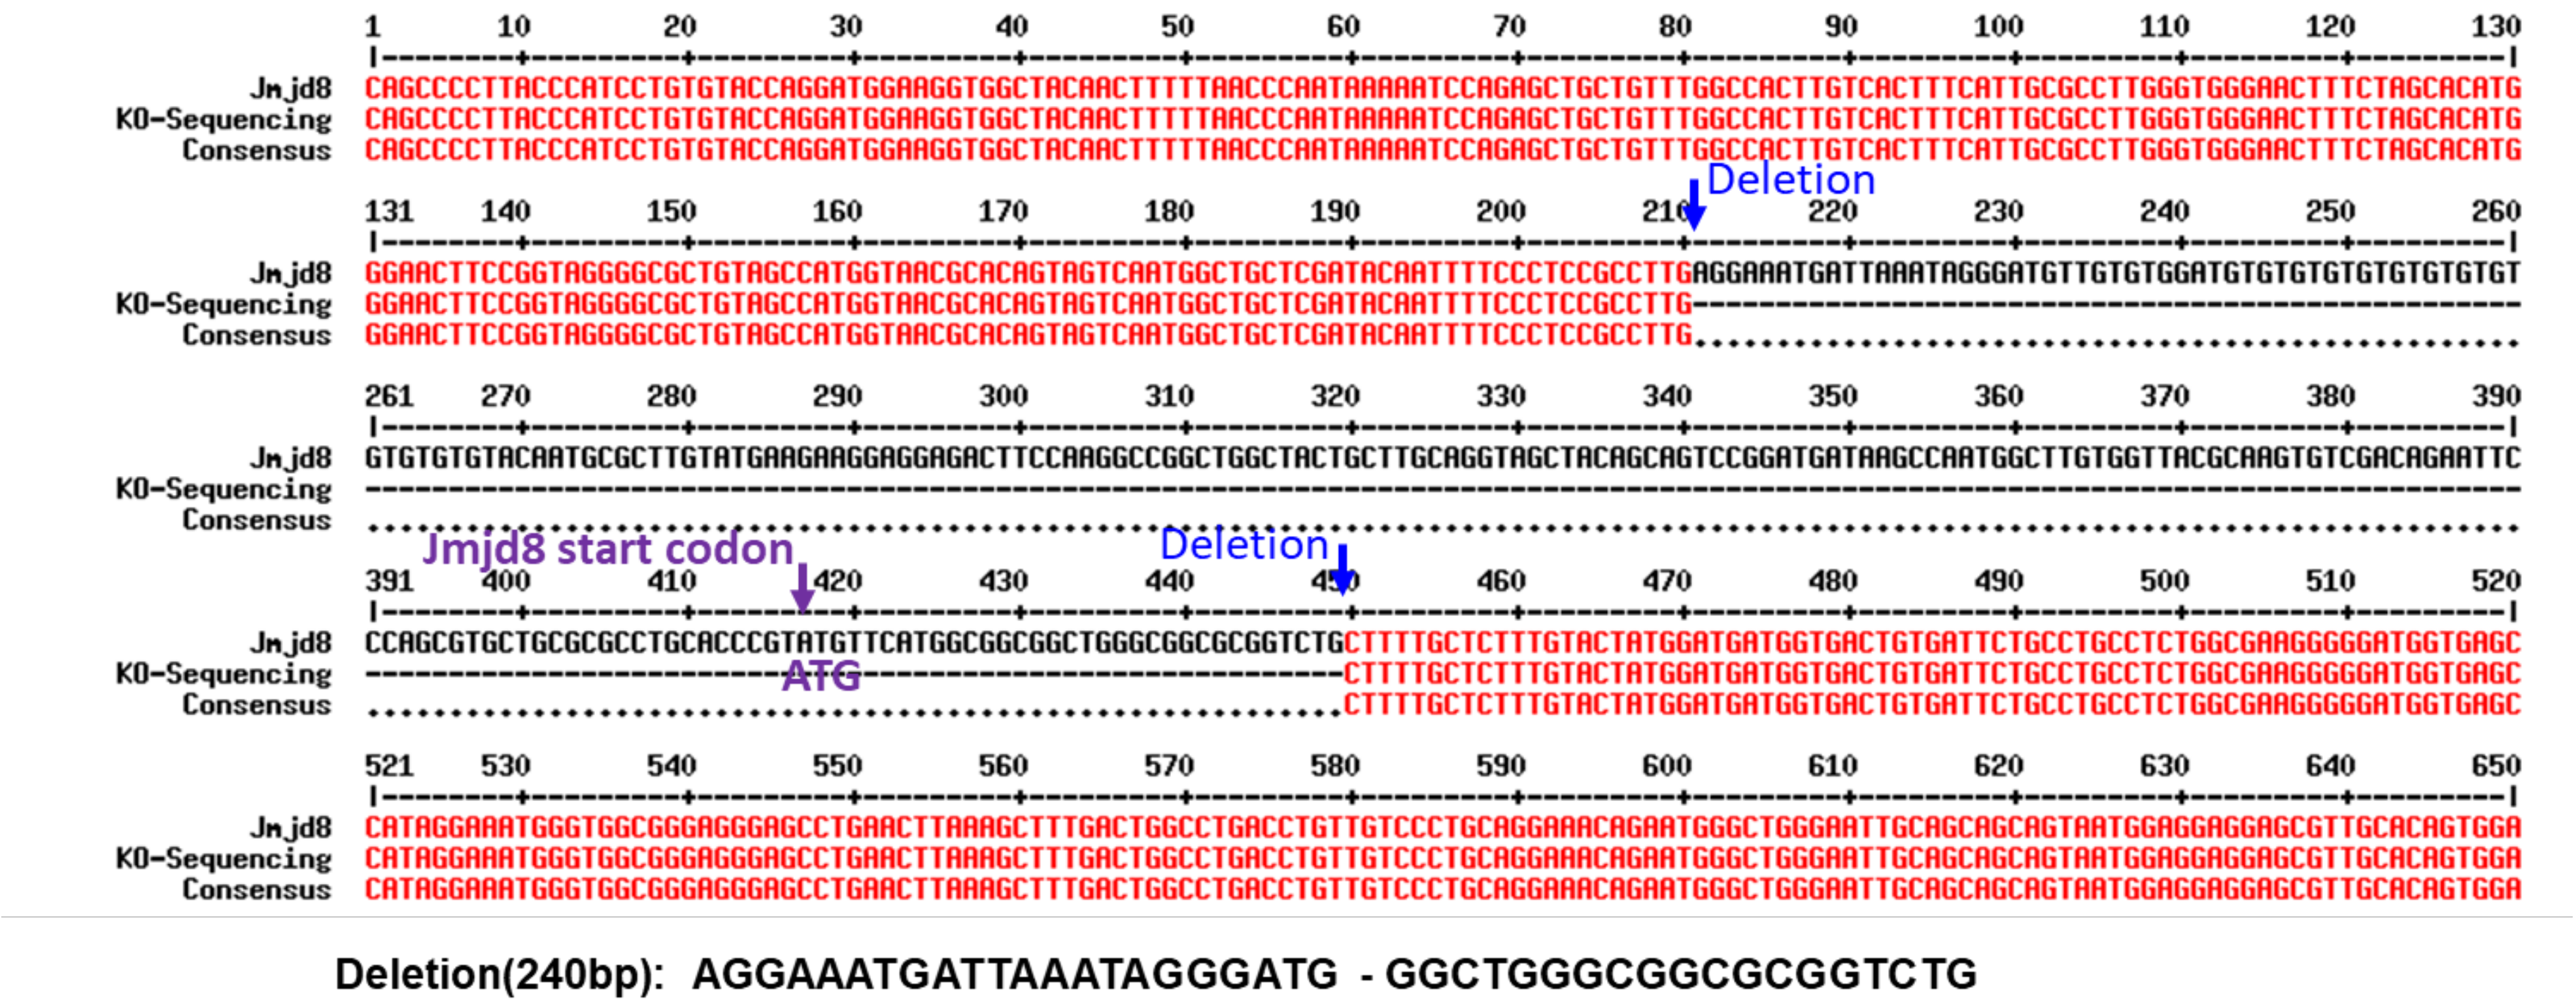

B

Chow

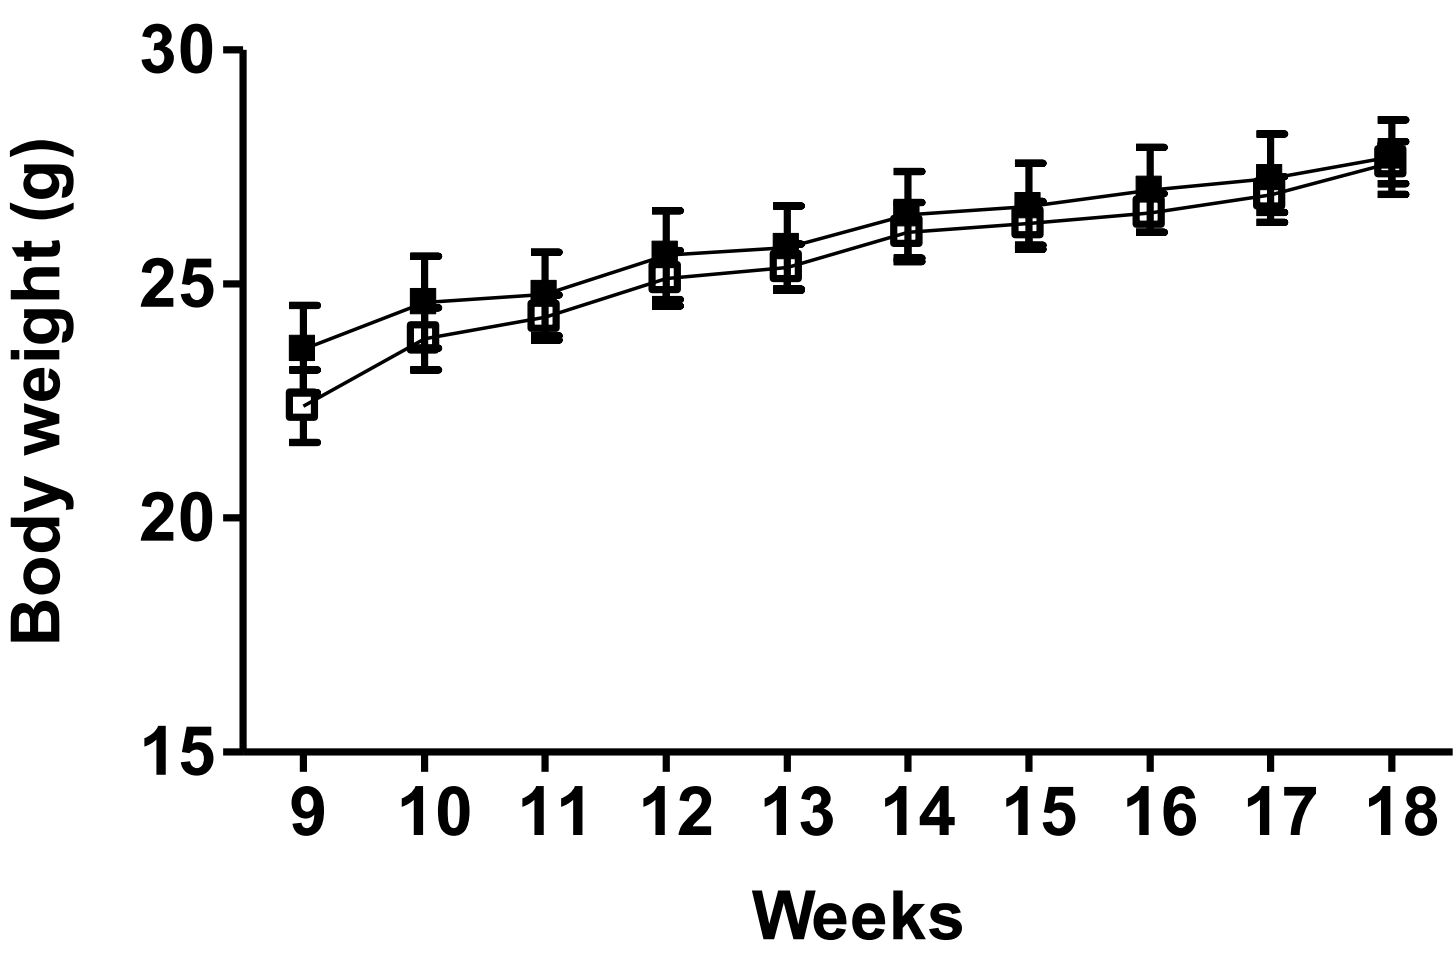

C

Chow

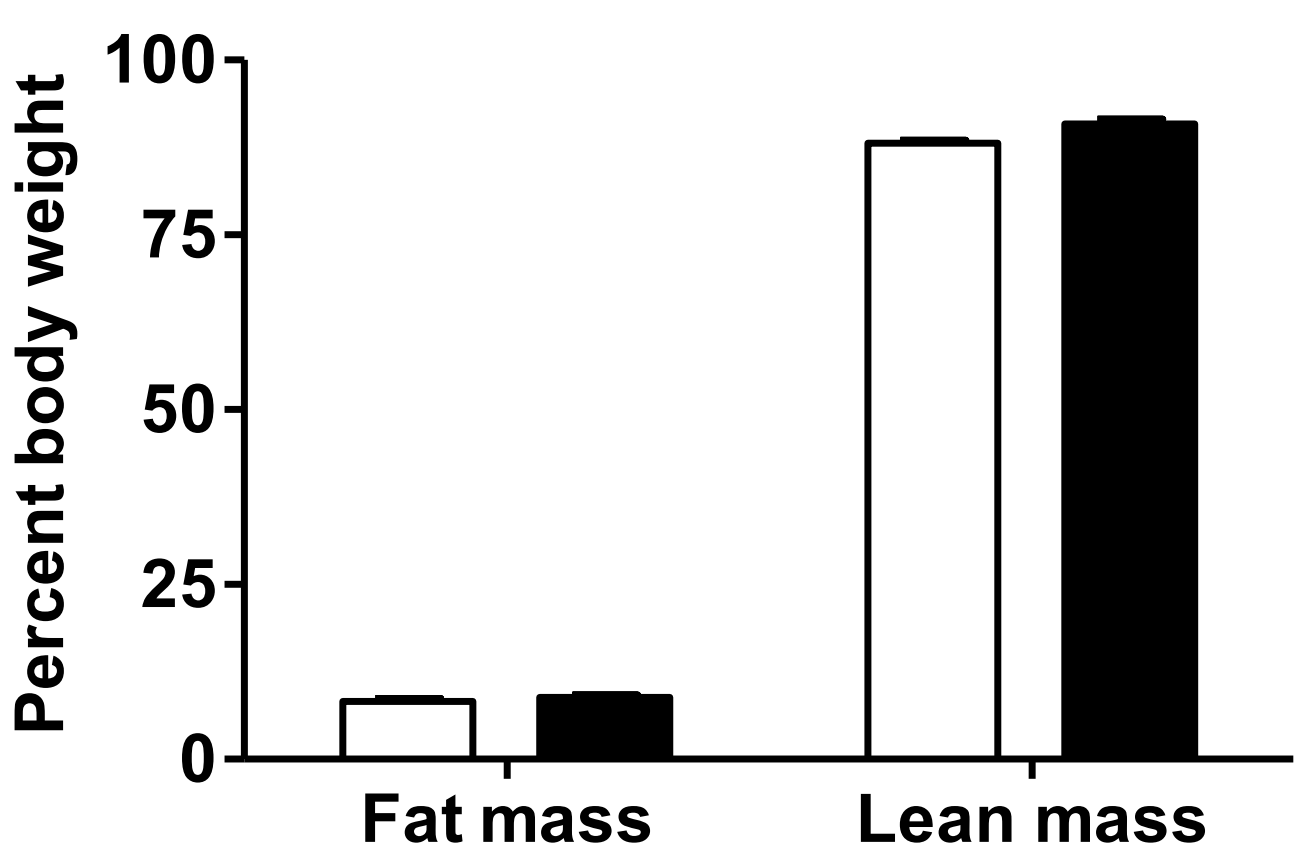

D

Chow

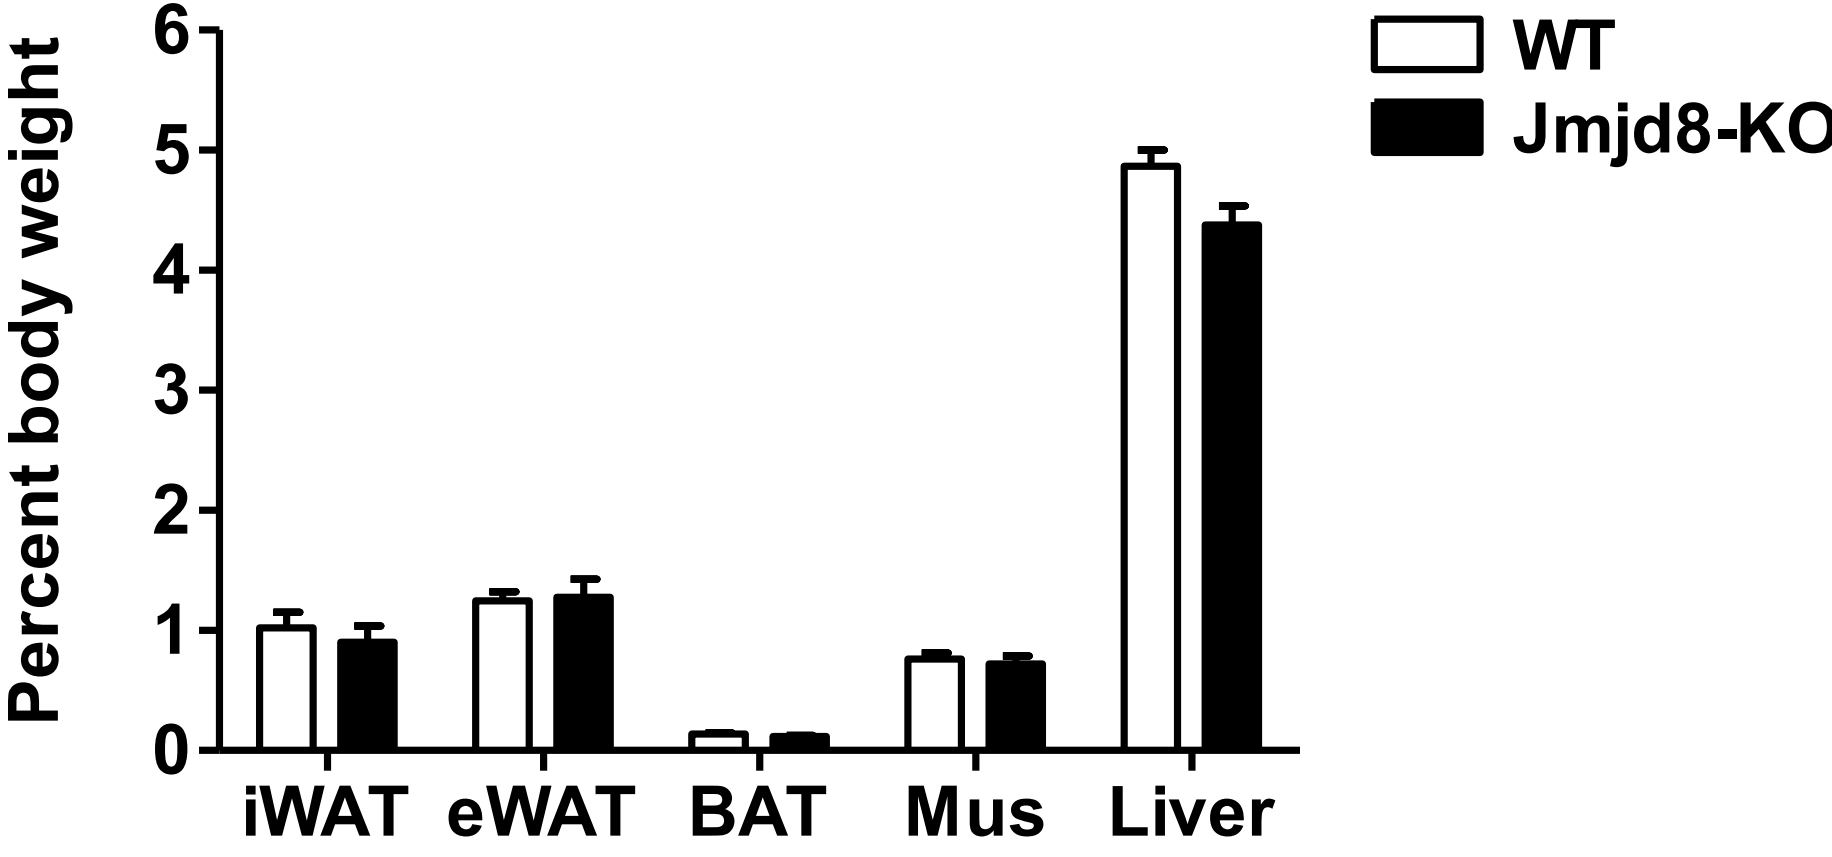

Supplemental Figure 5

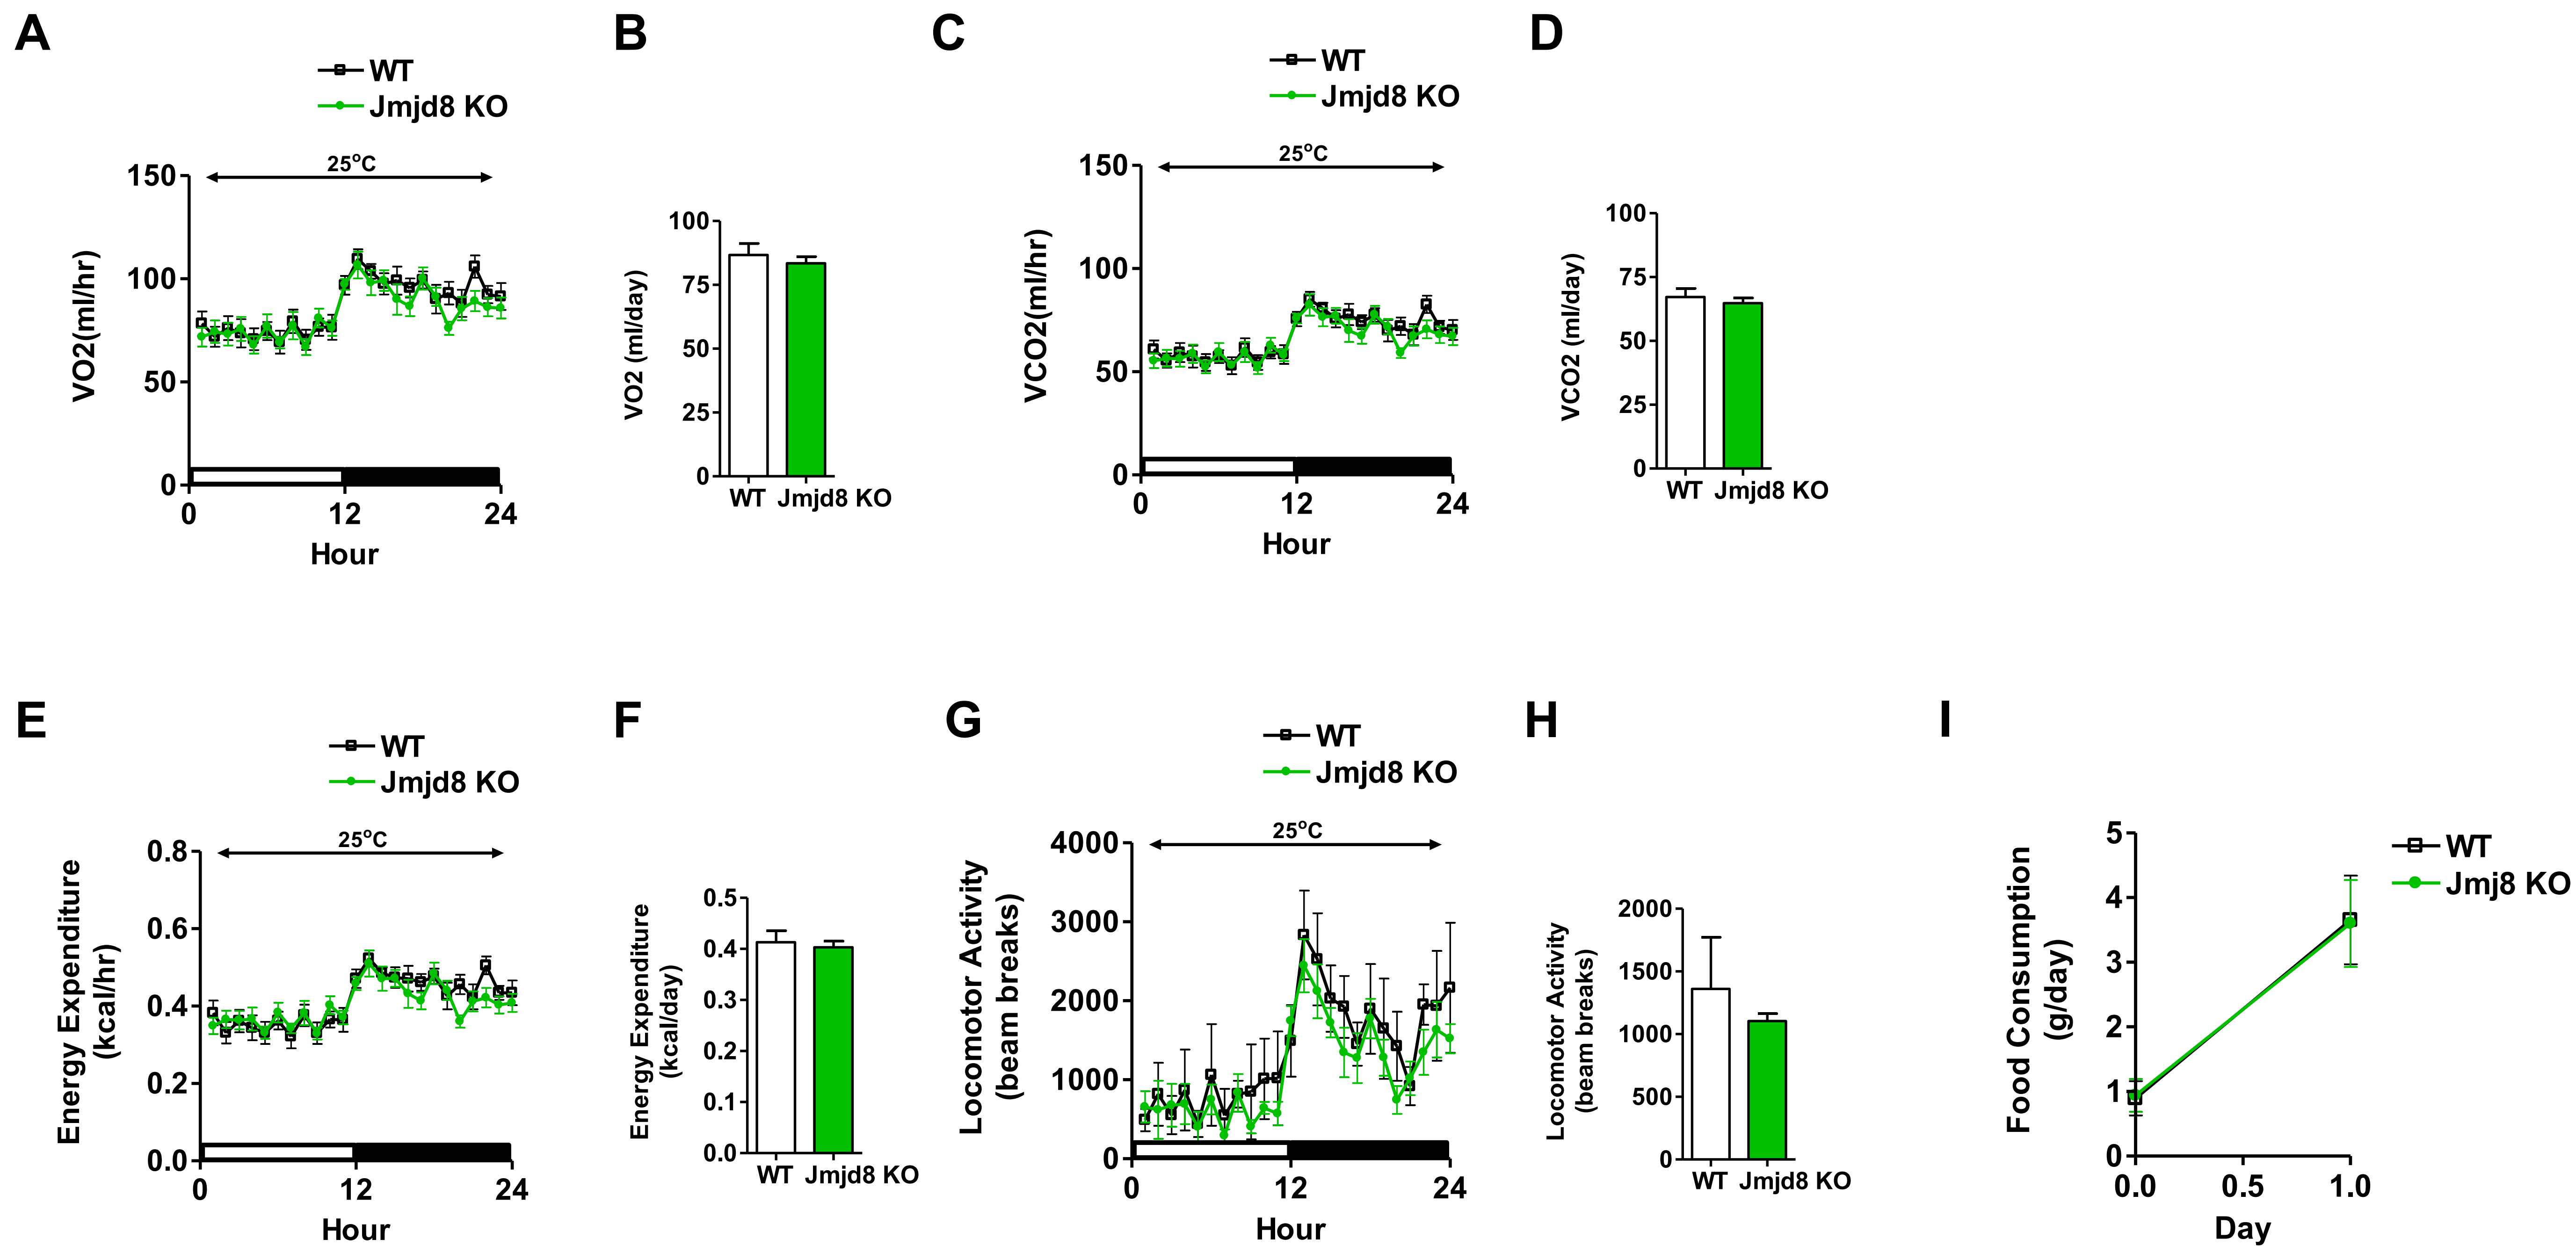



Supplemental Figure 6

**A**

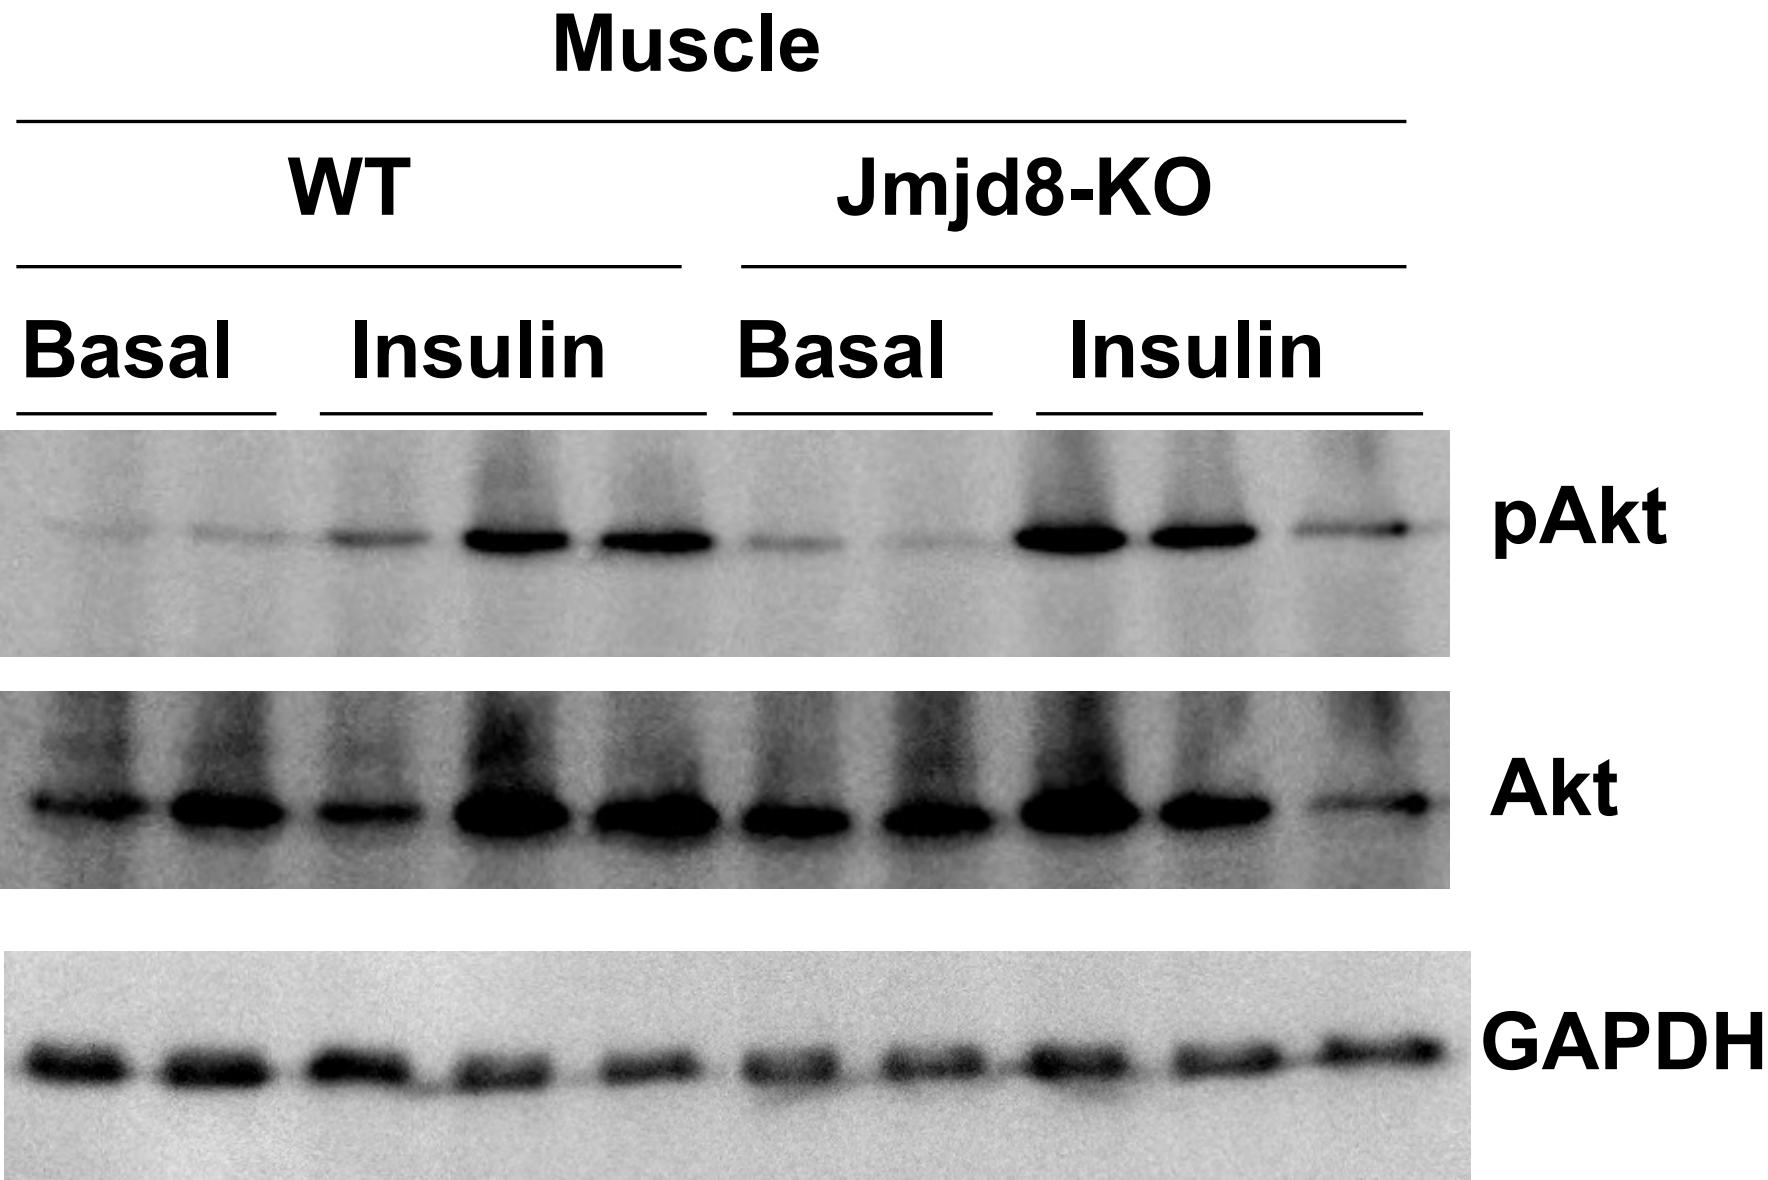

**B**

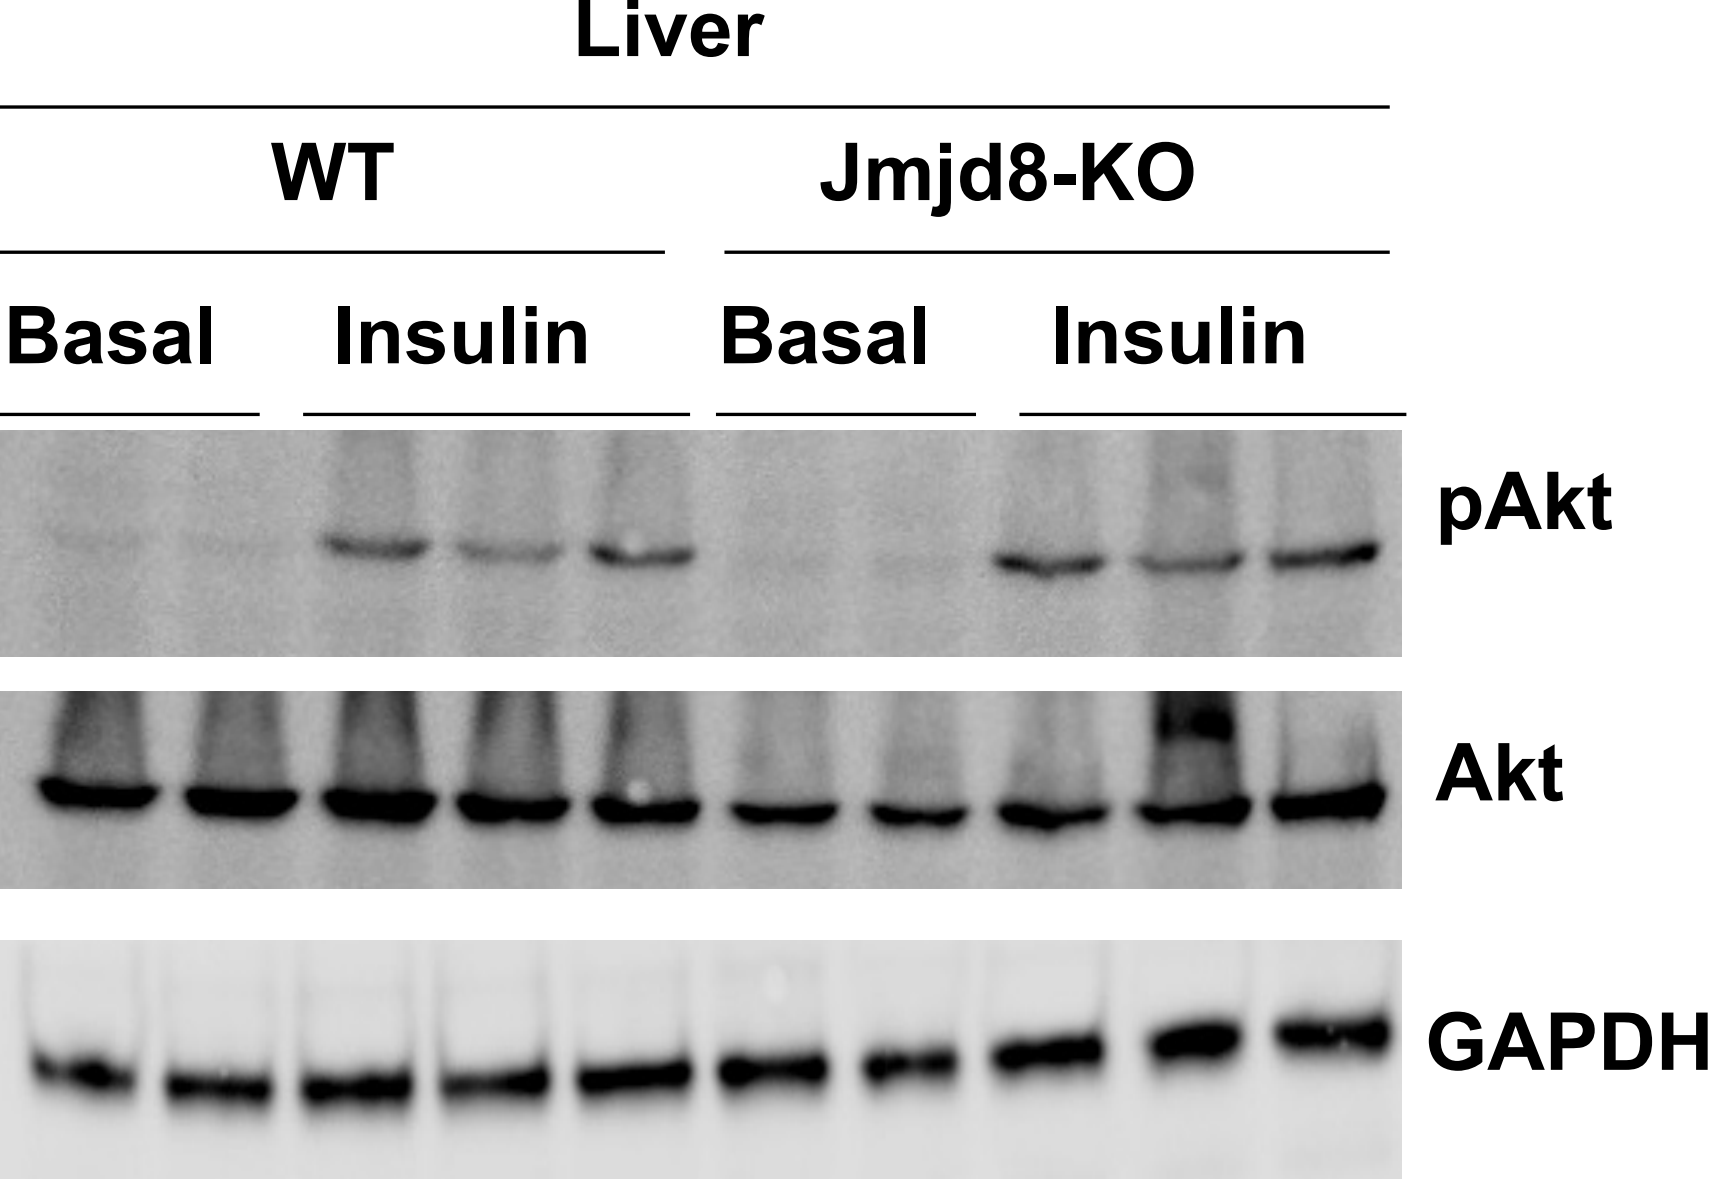

**C**

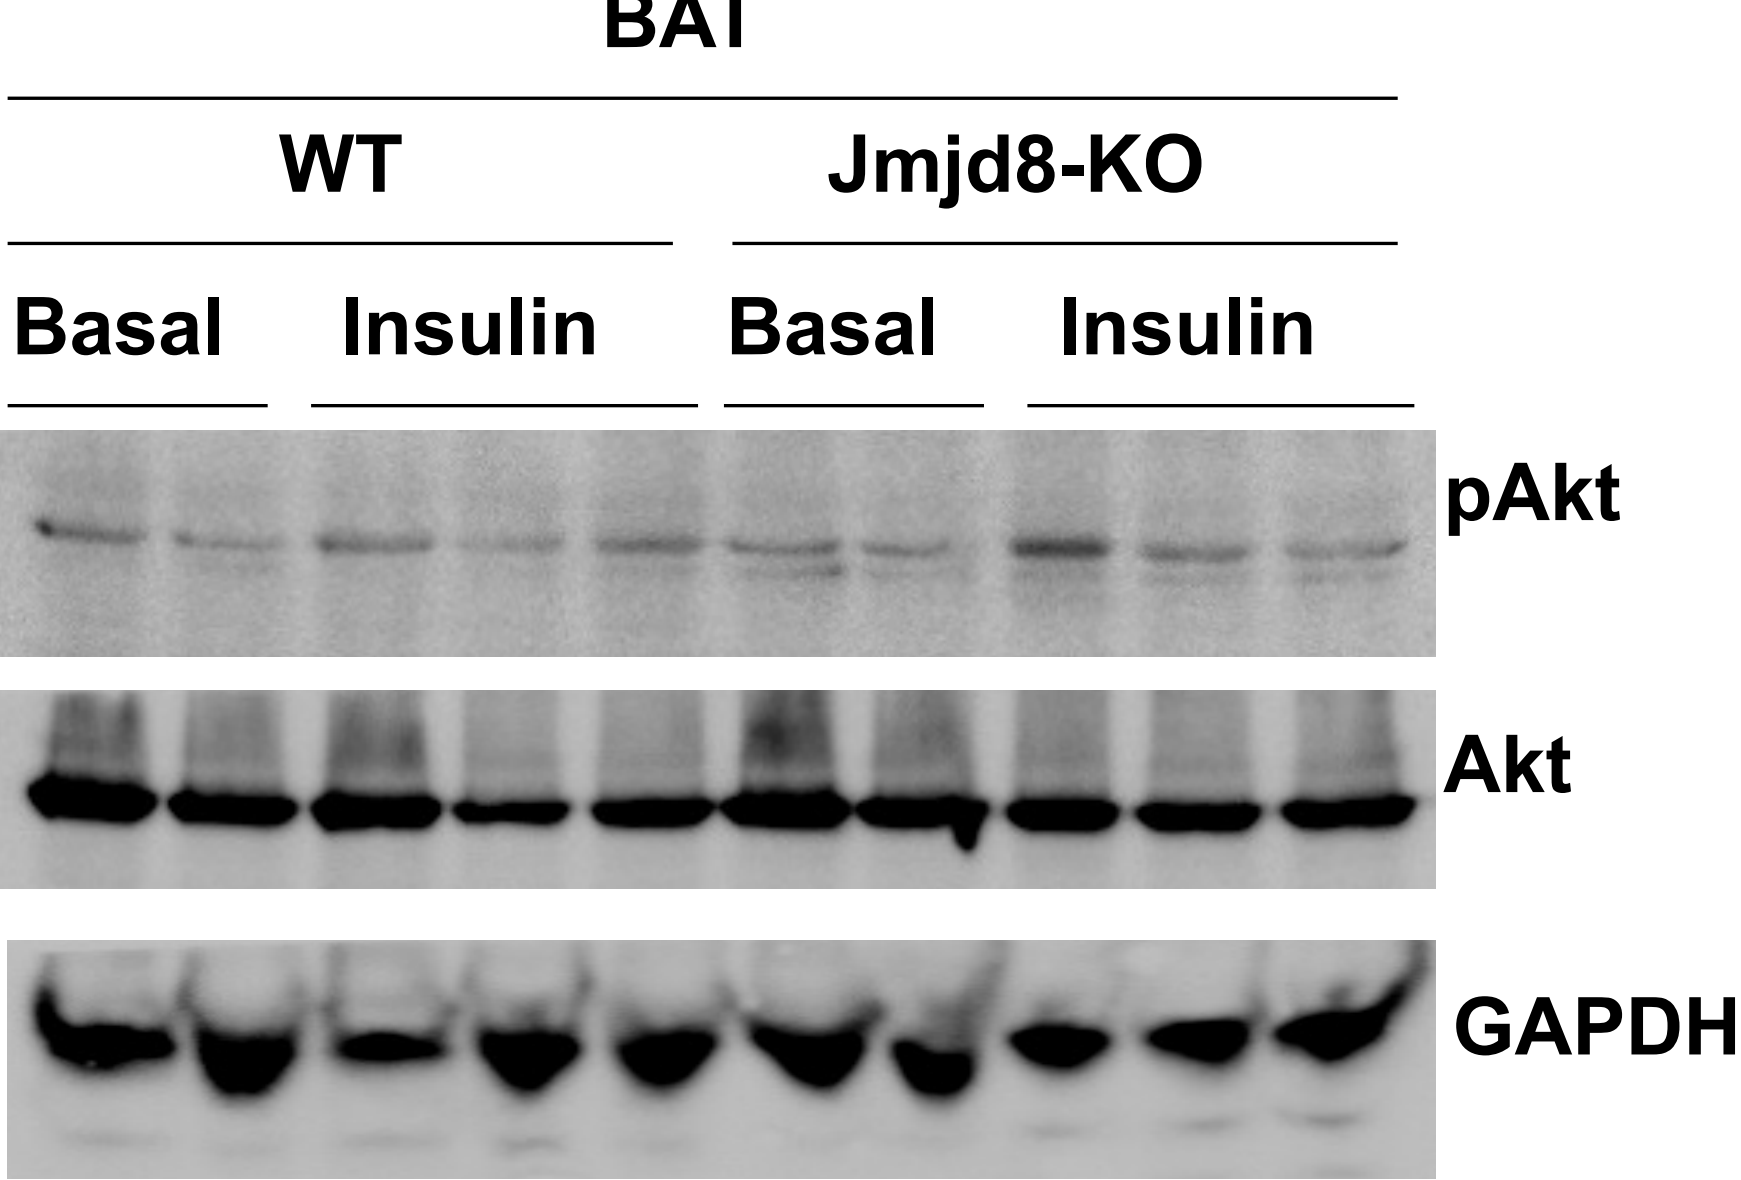

**D**

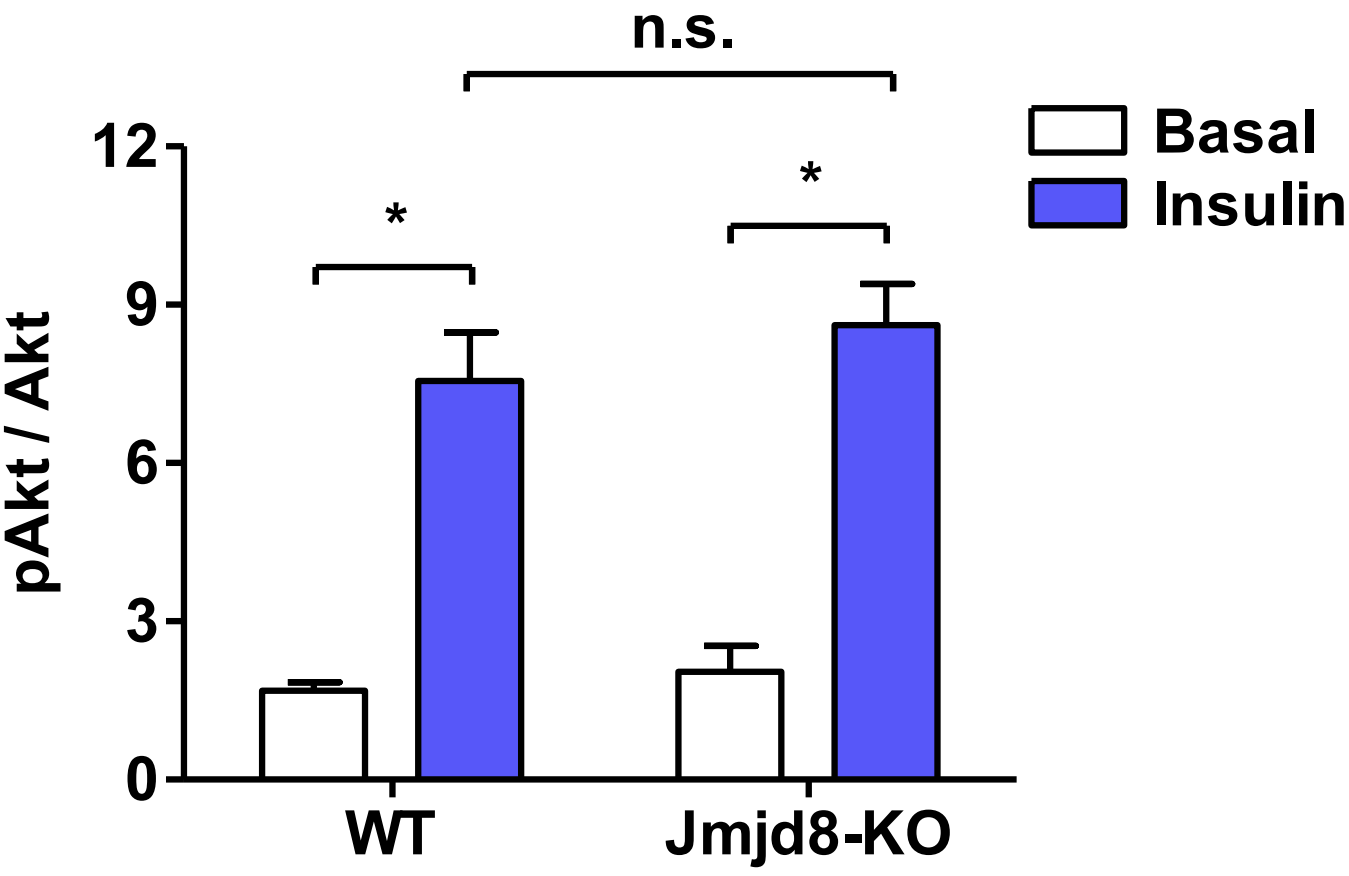

**E**

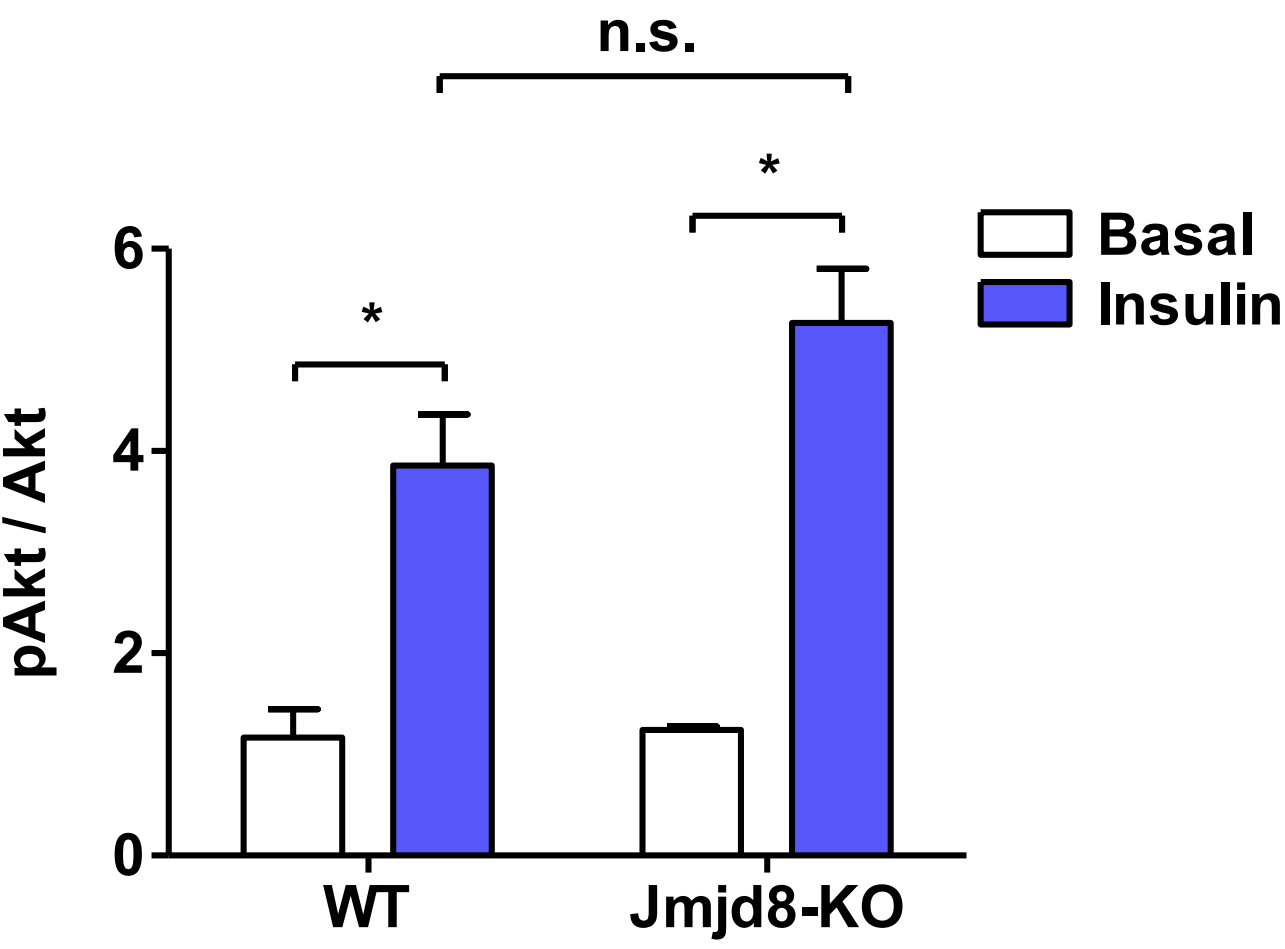

**F**

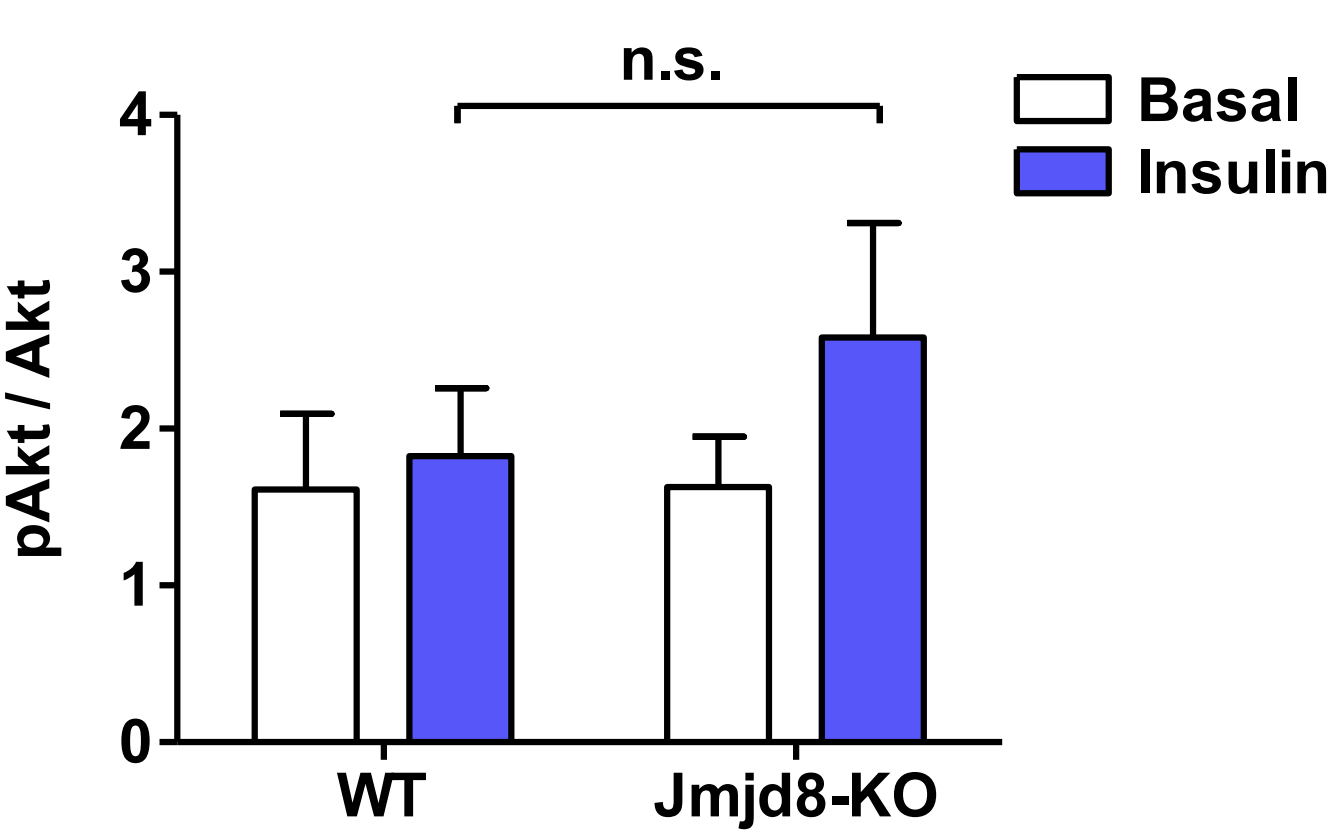

**G**

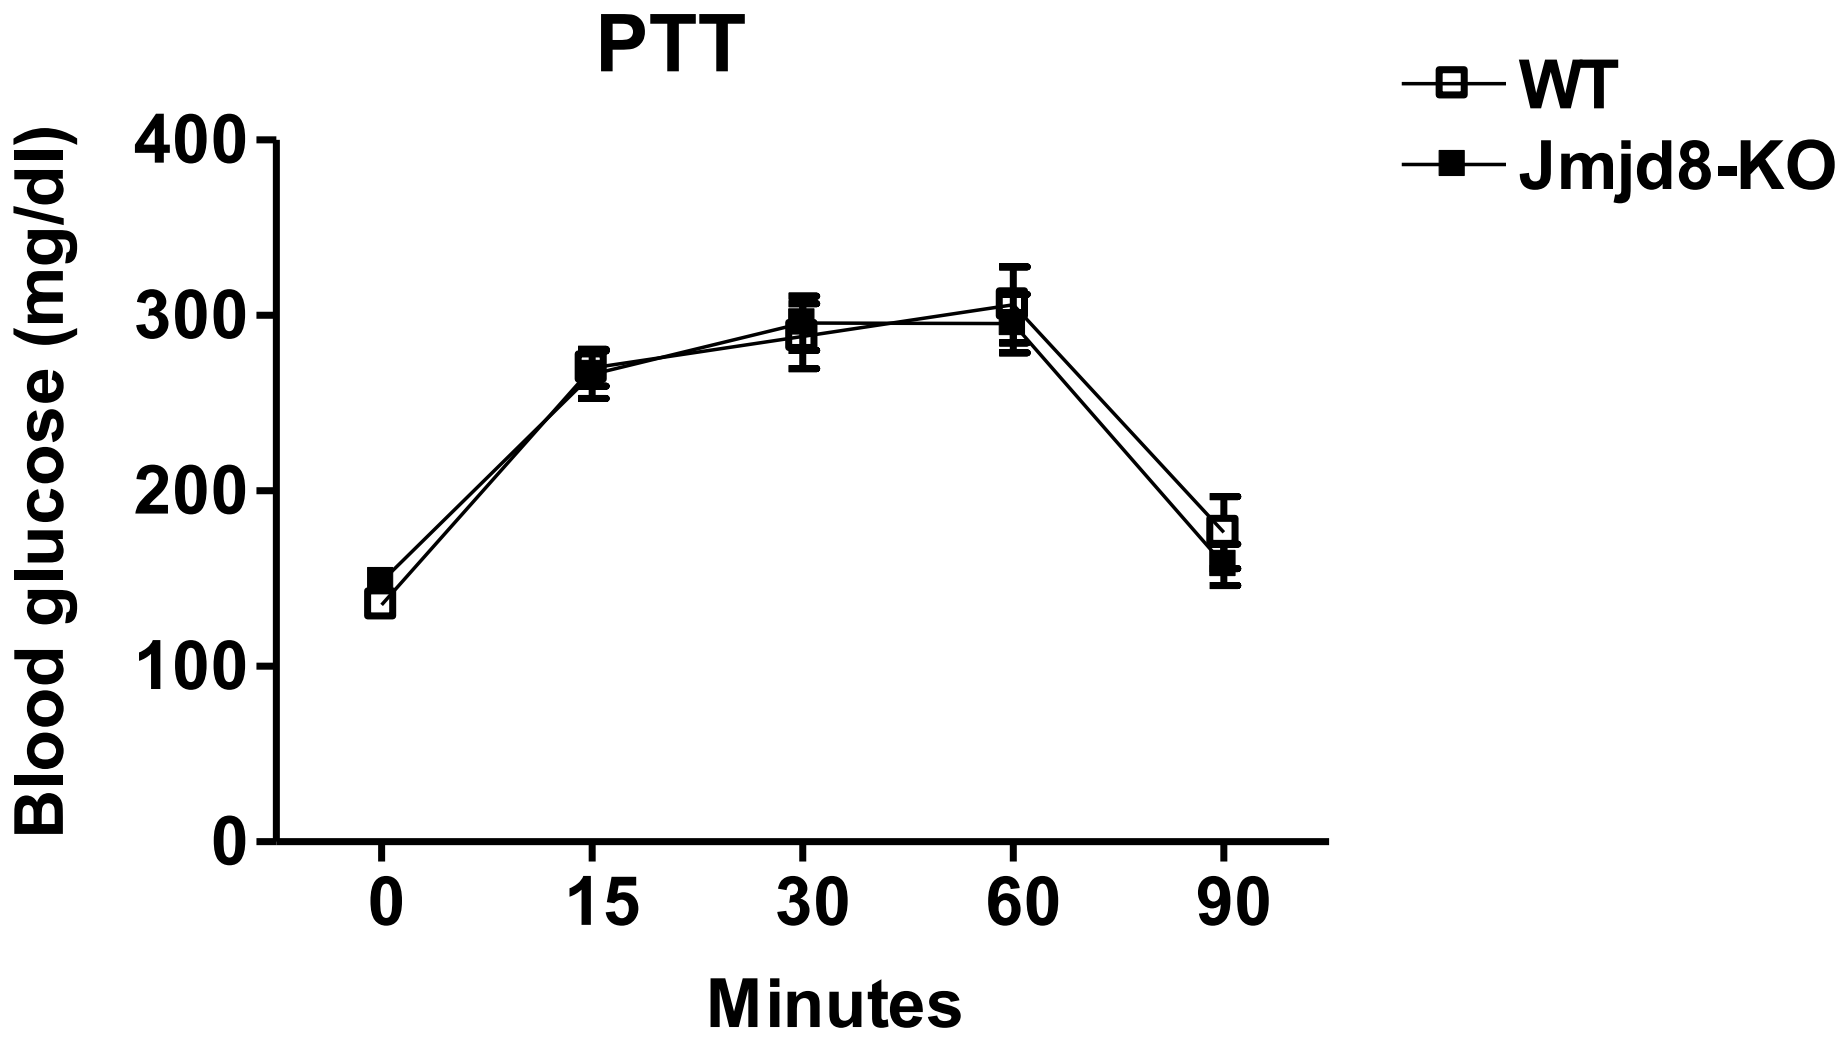

## Supplemental Figure 7

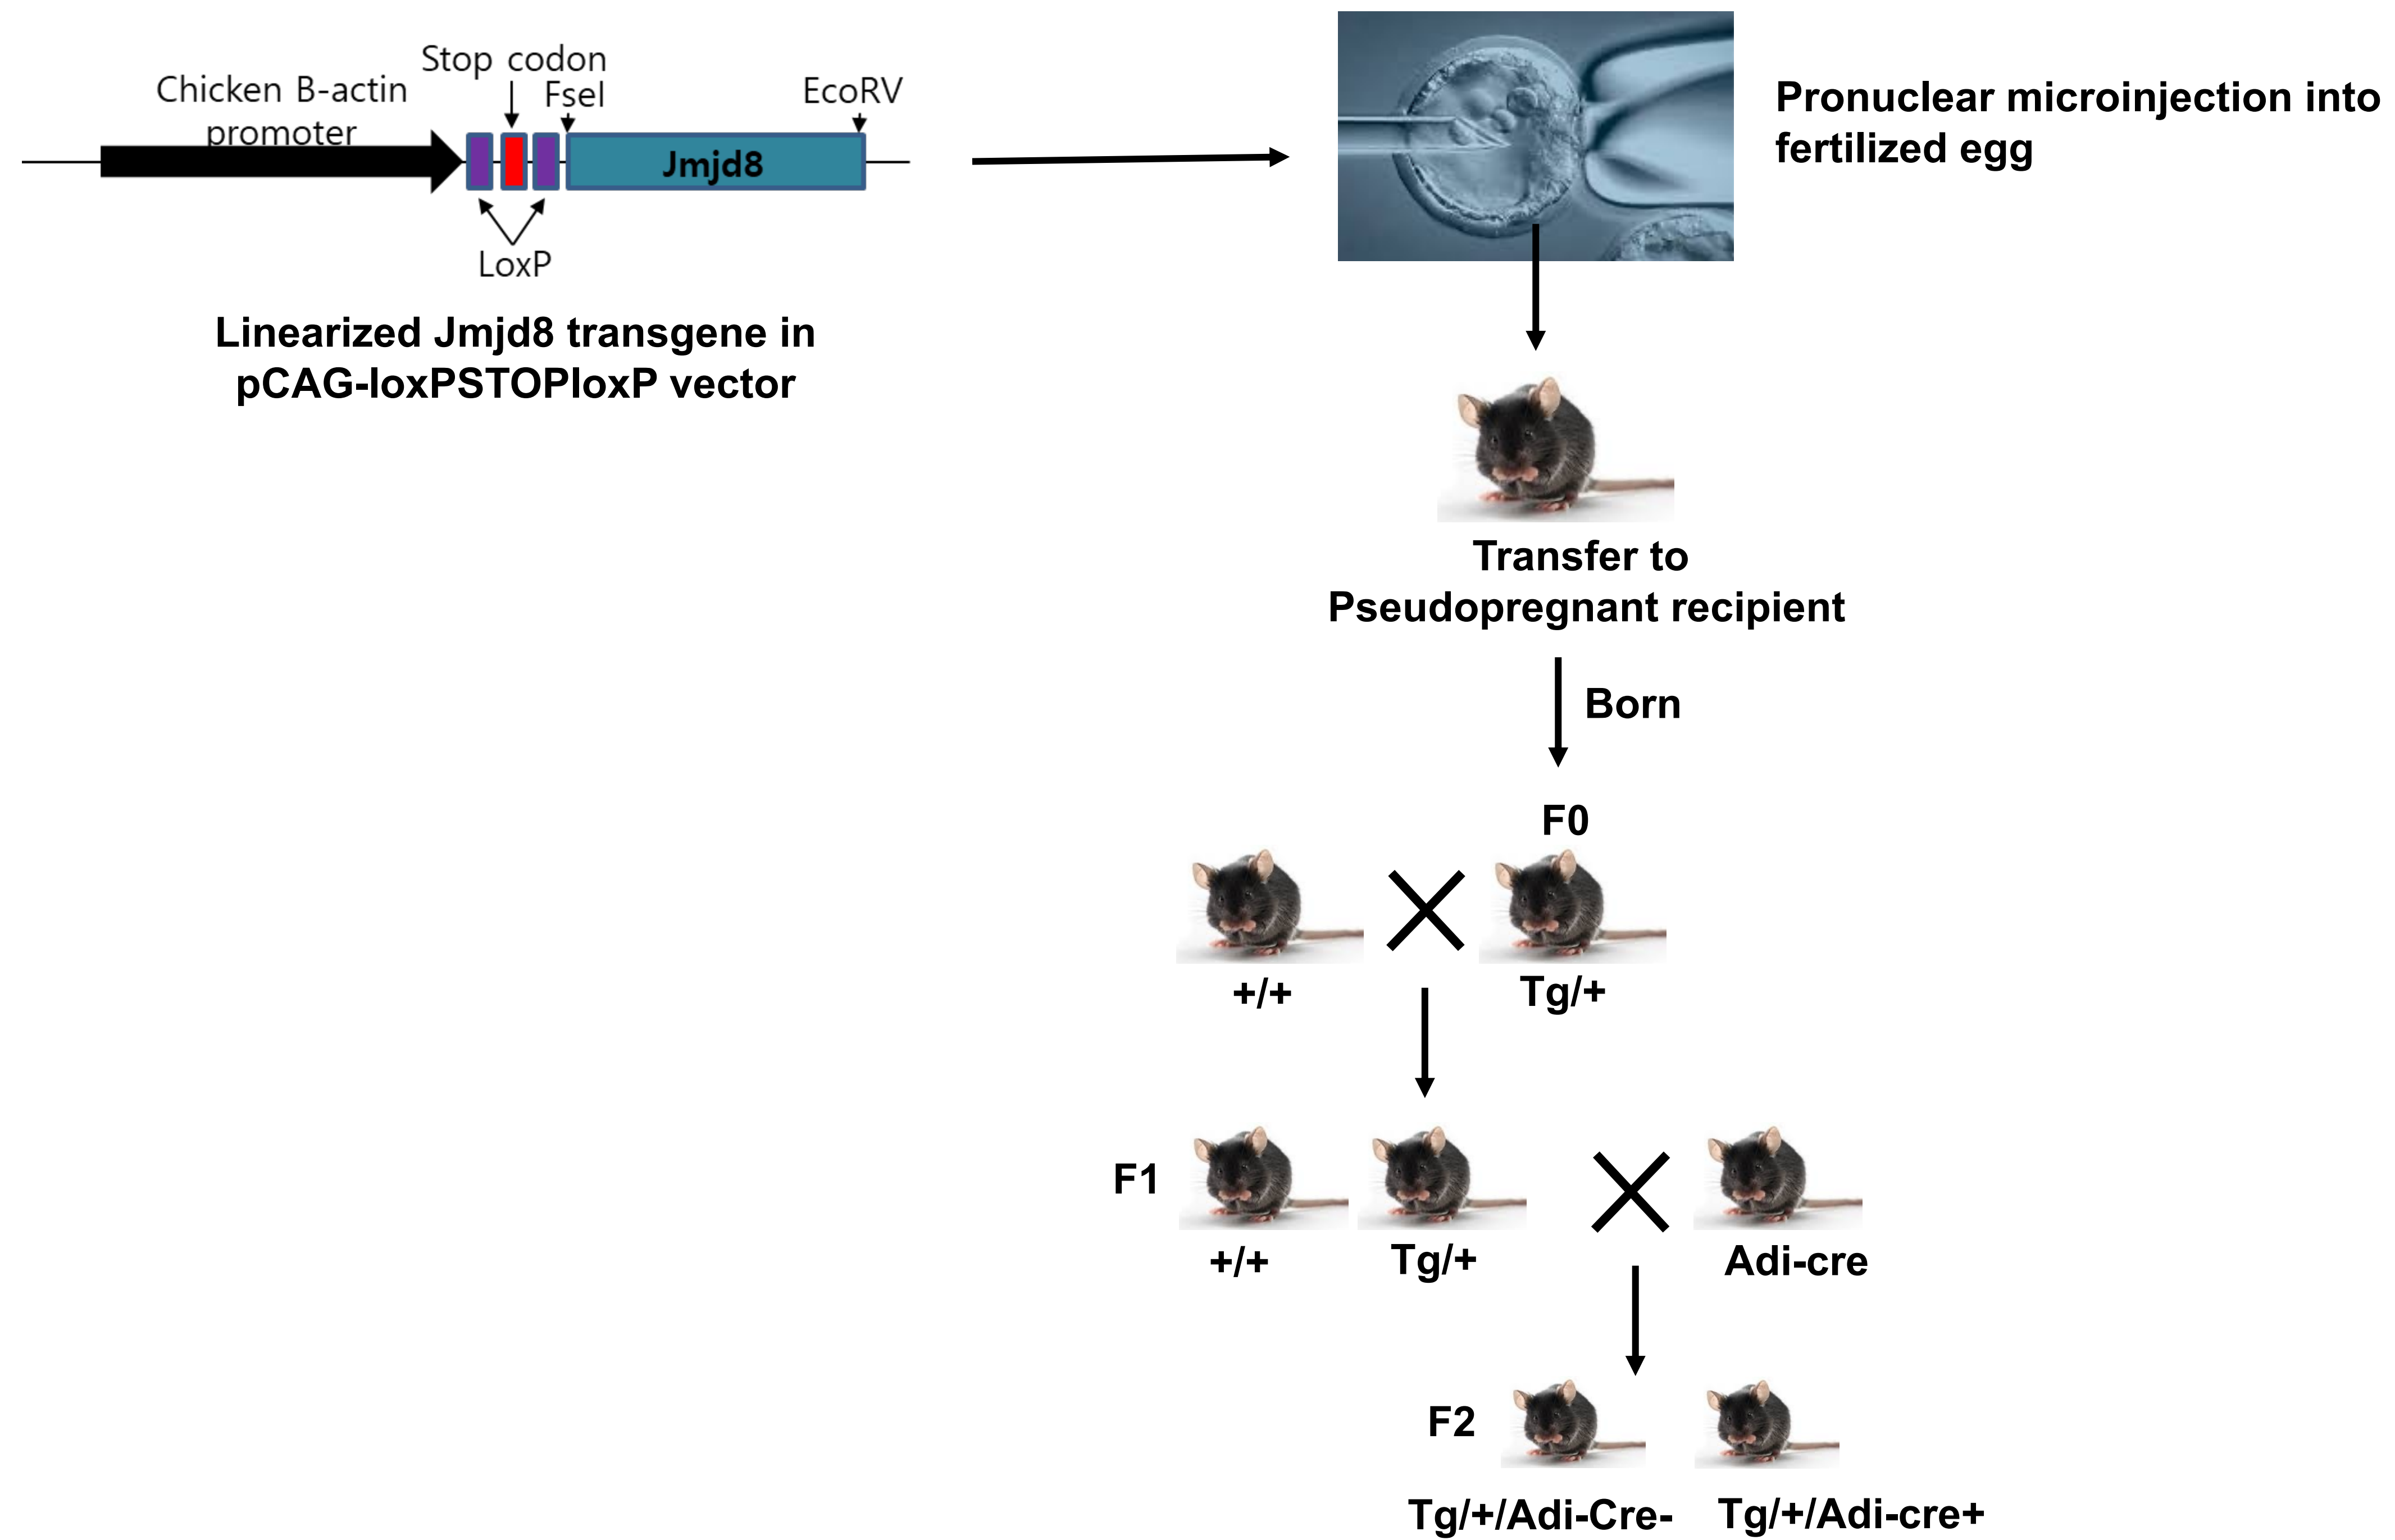

Supplemental Figure 8

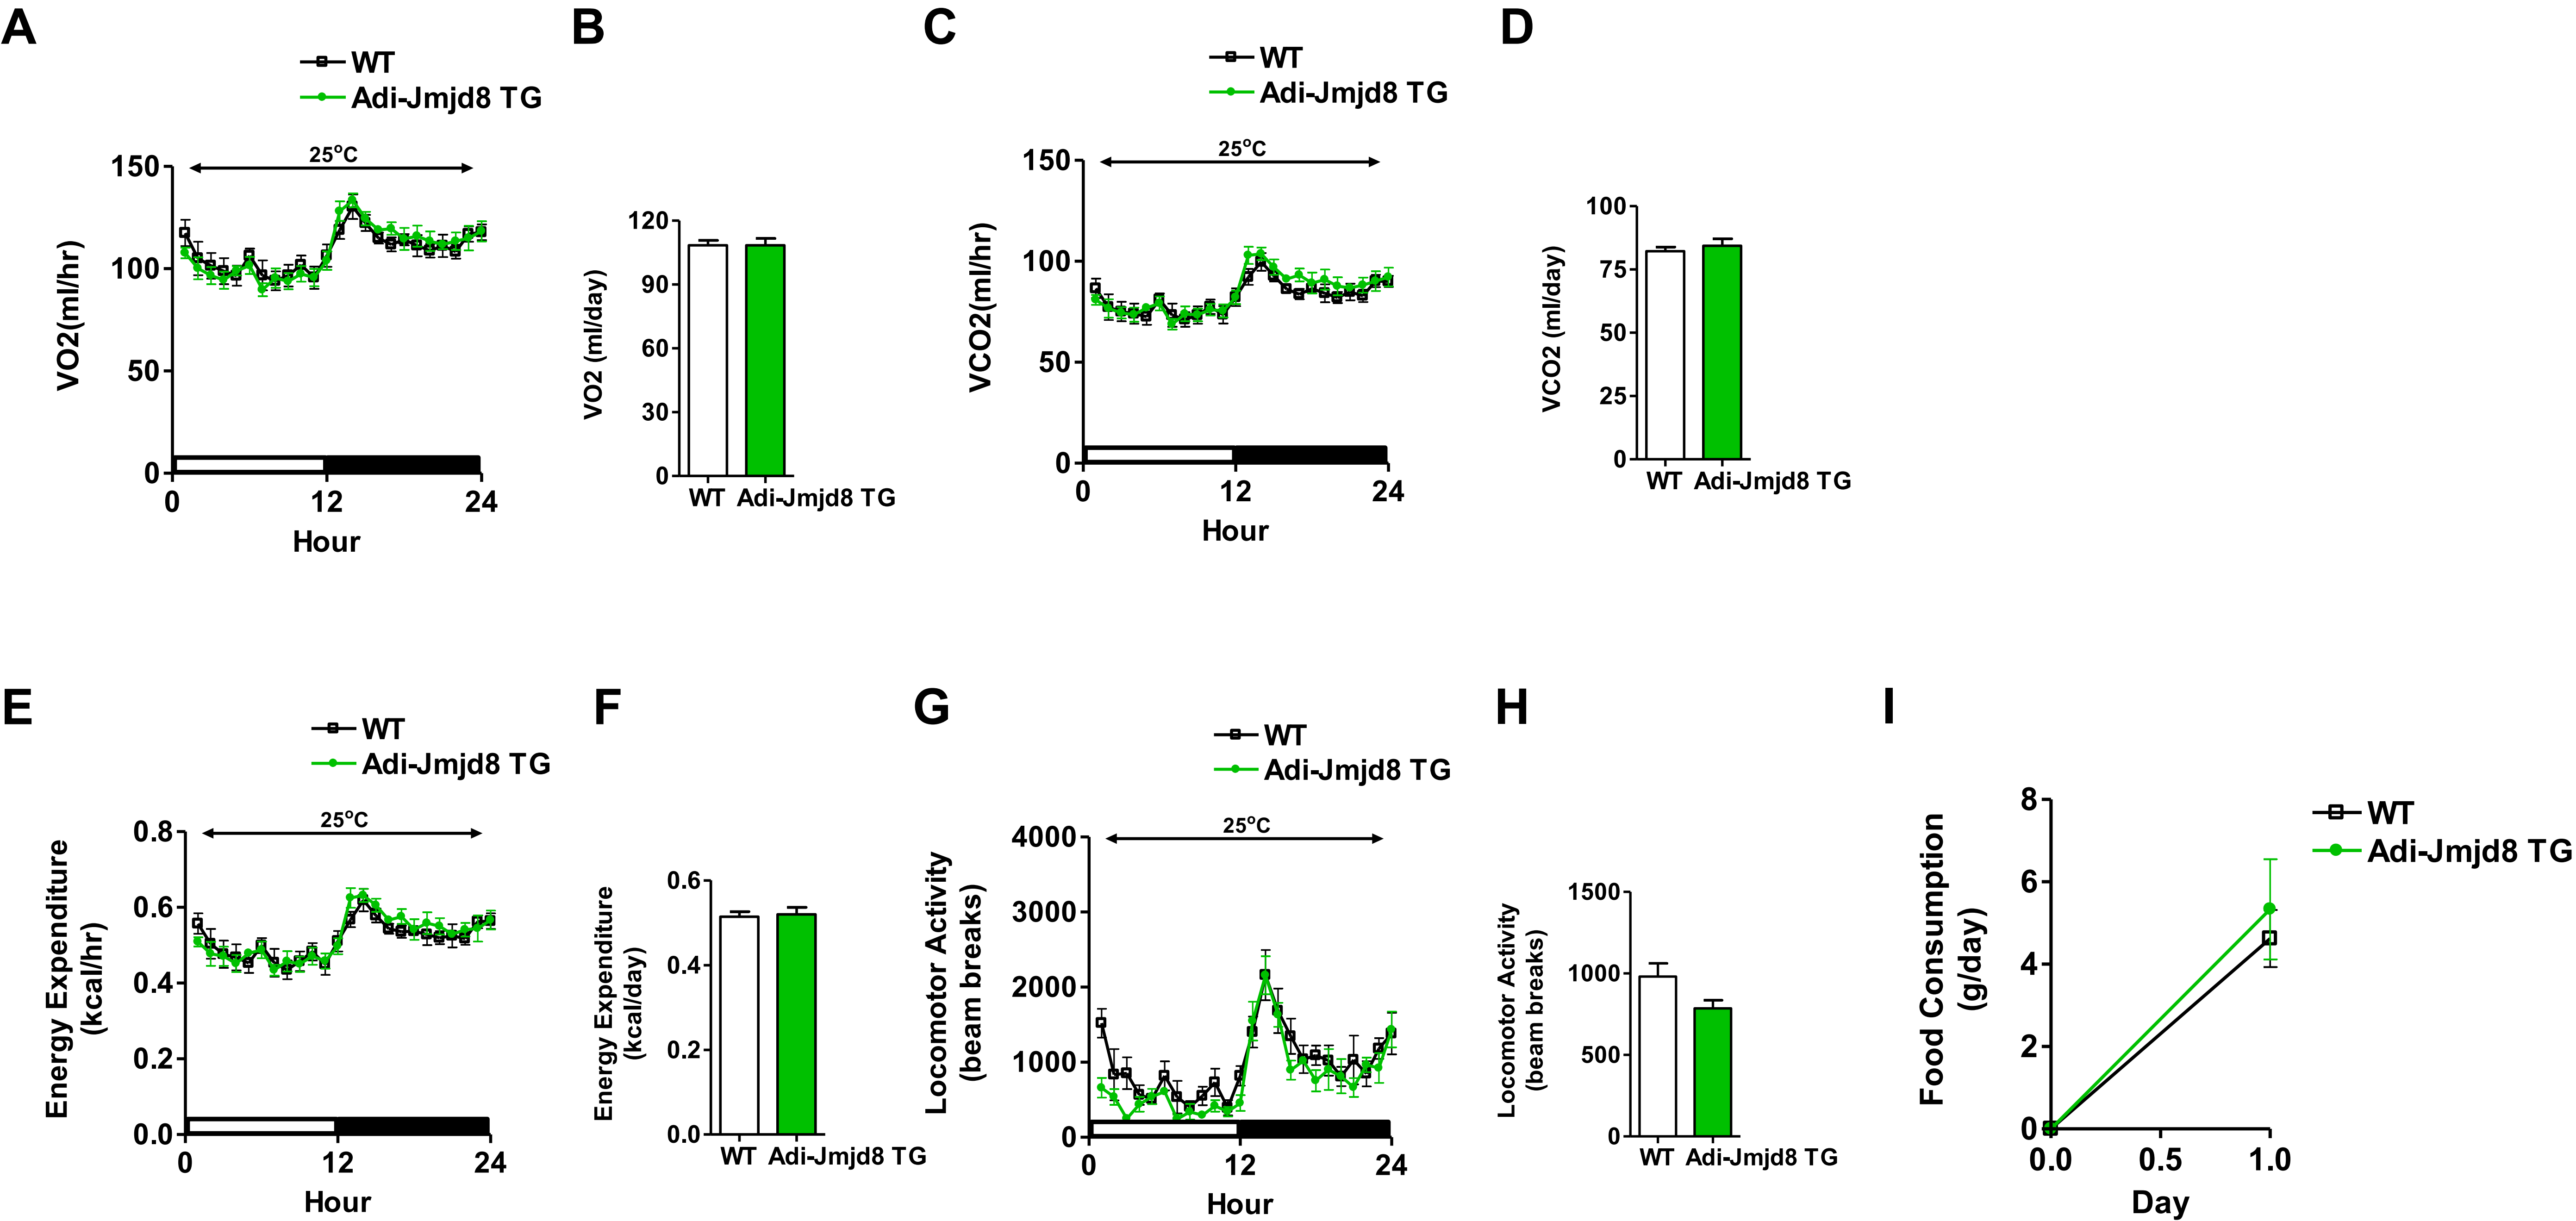



**A**

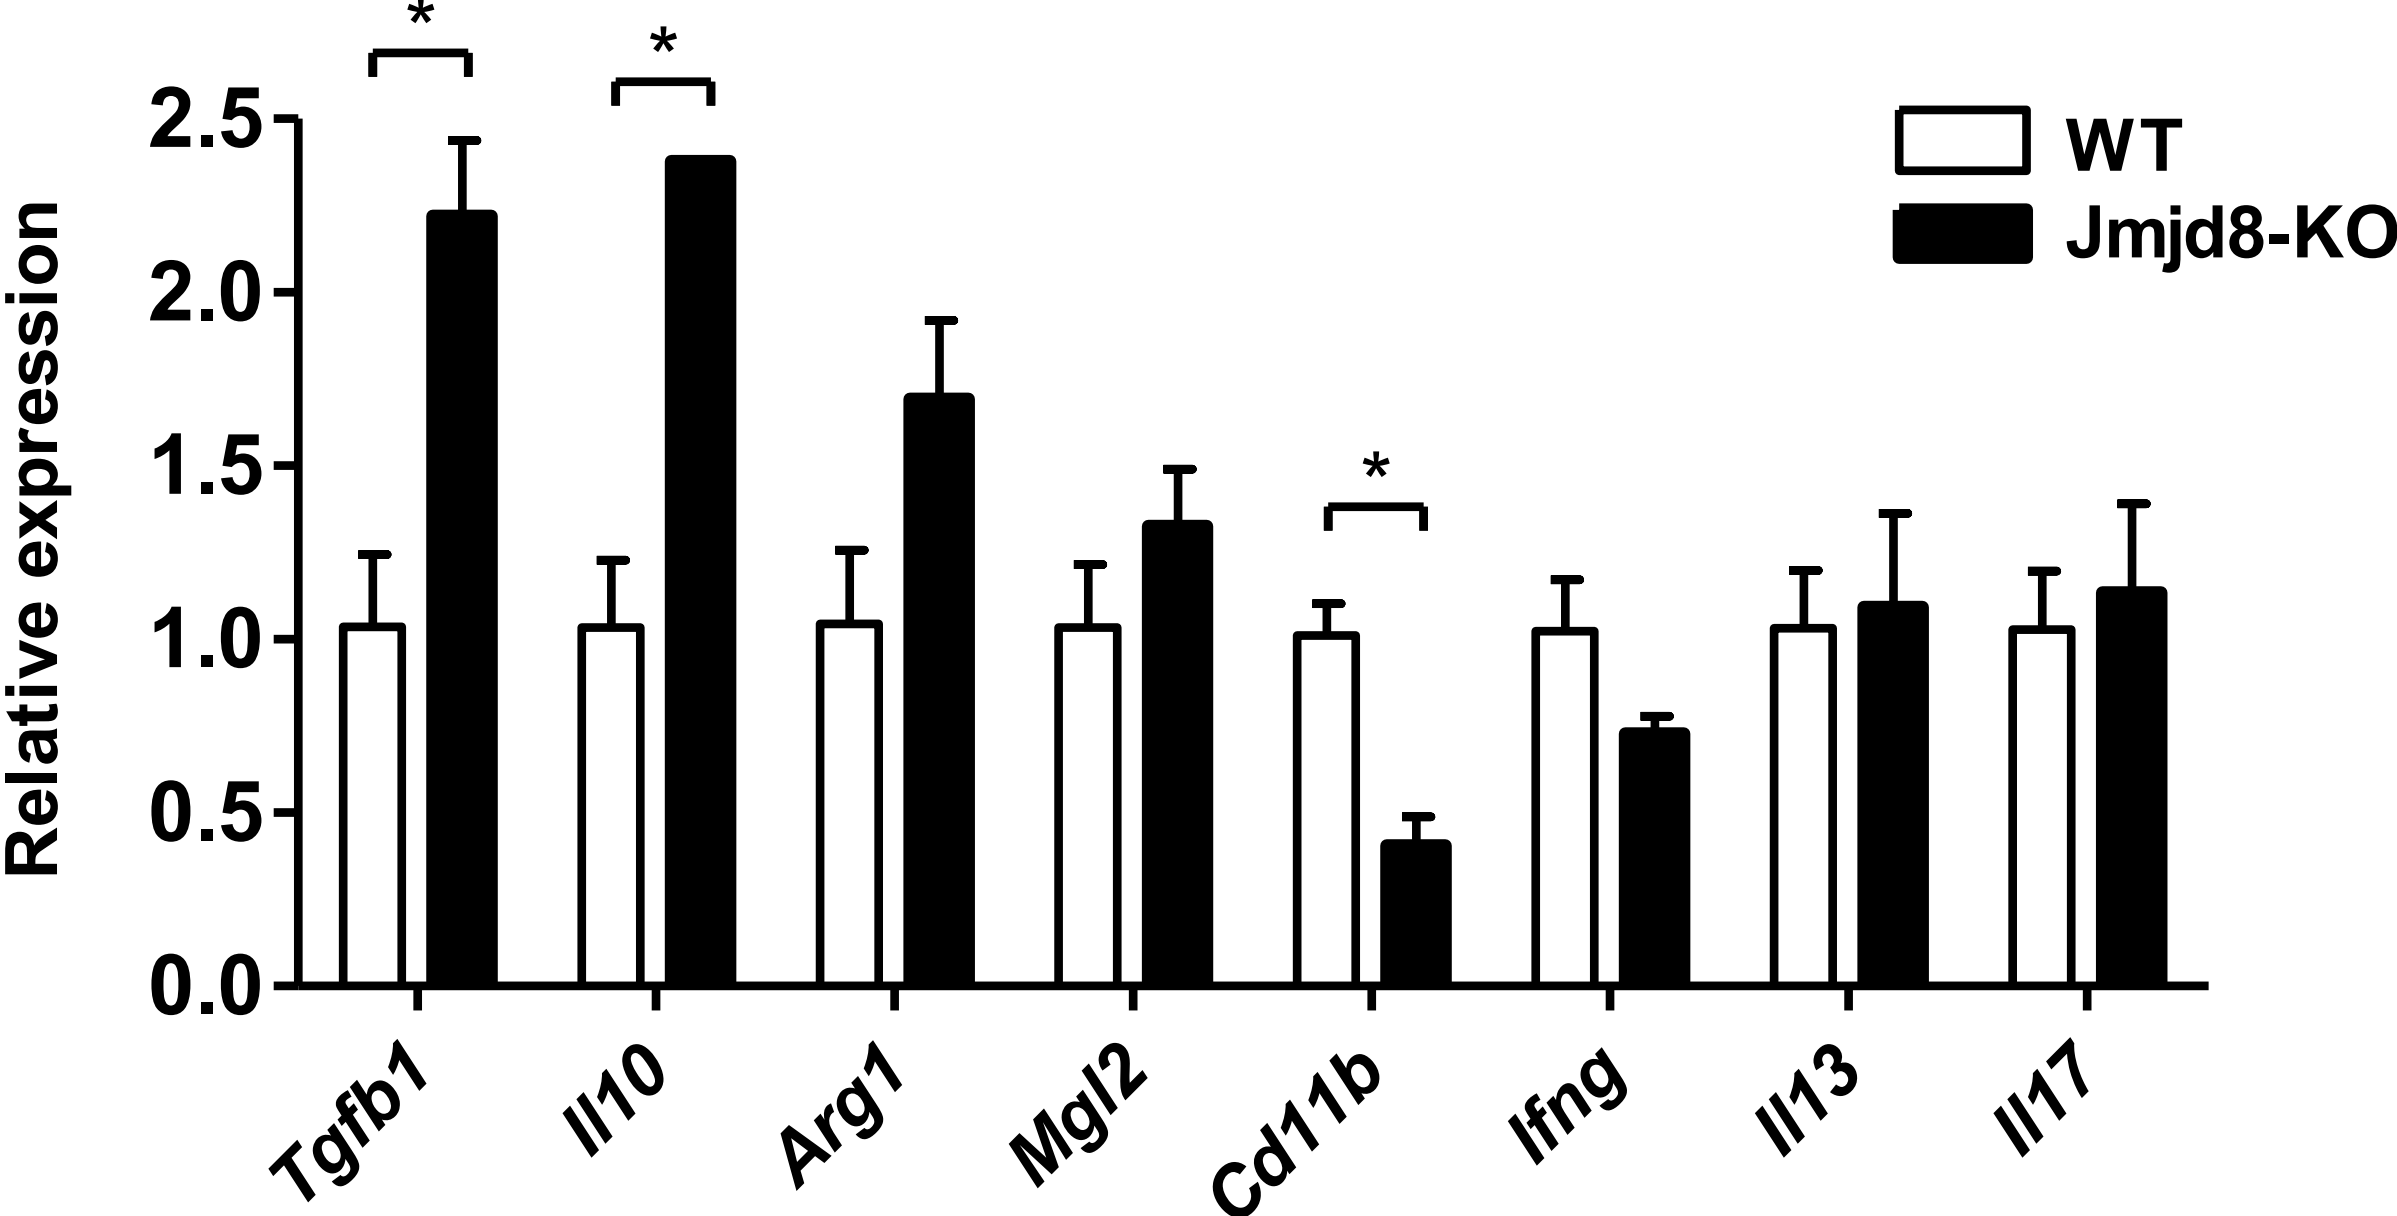

**B**

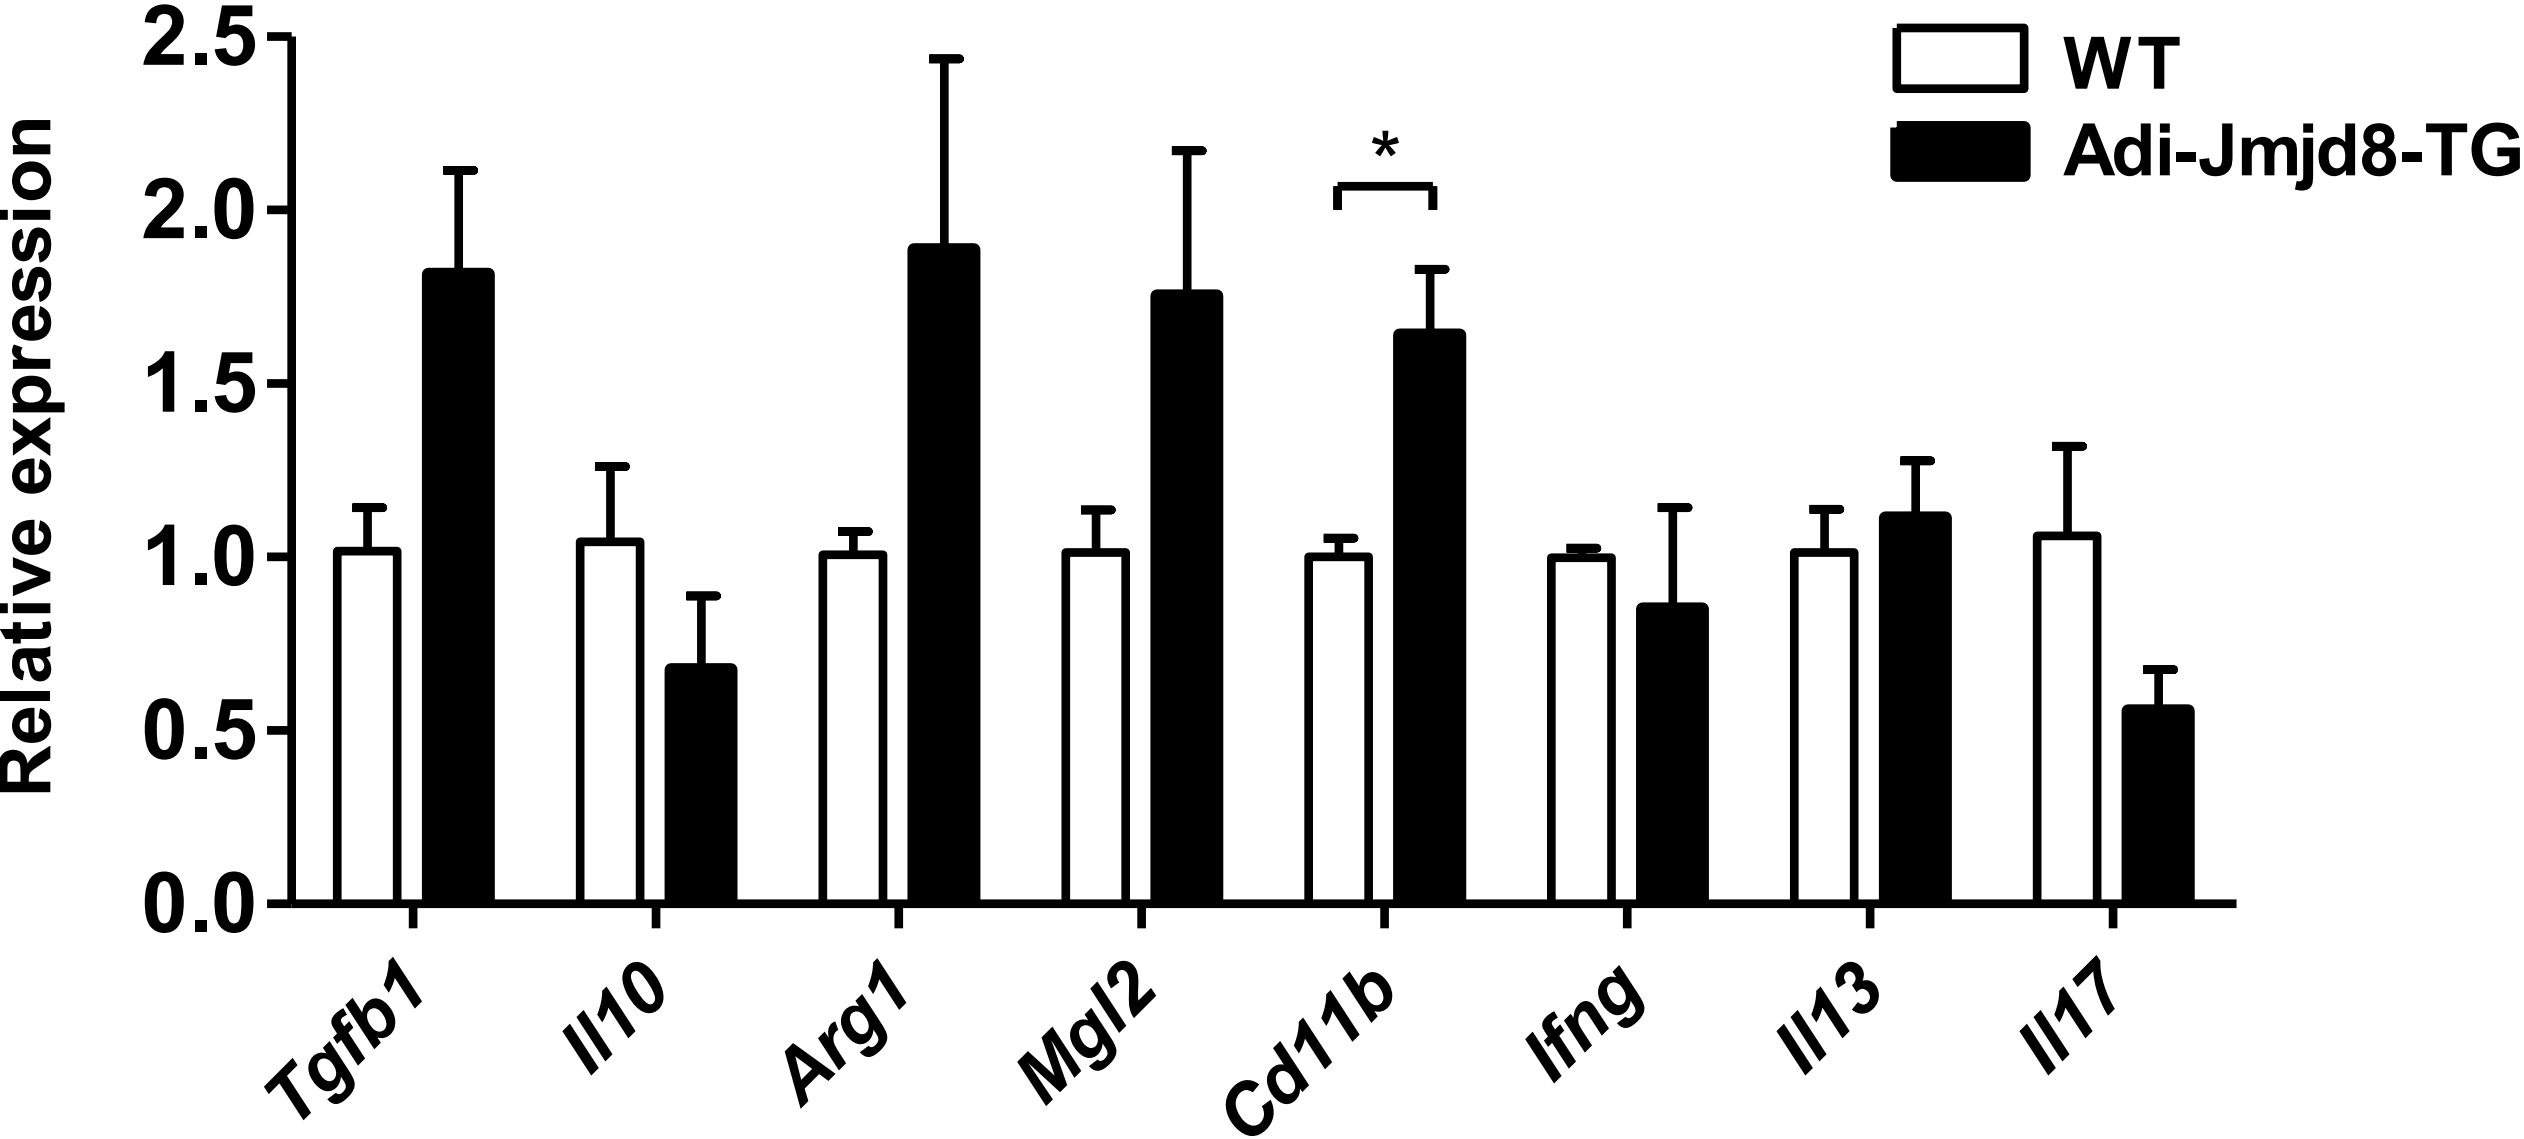

Supplemental Figure 10

A

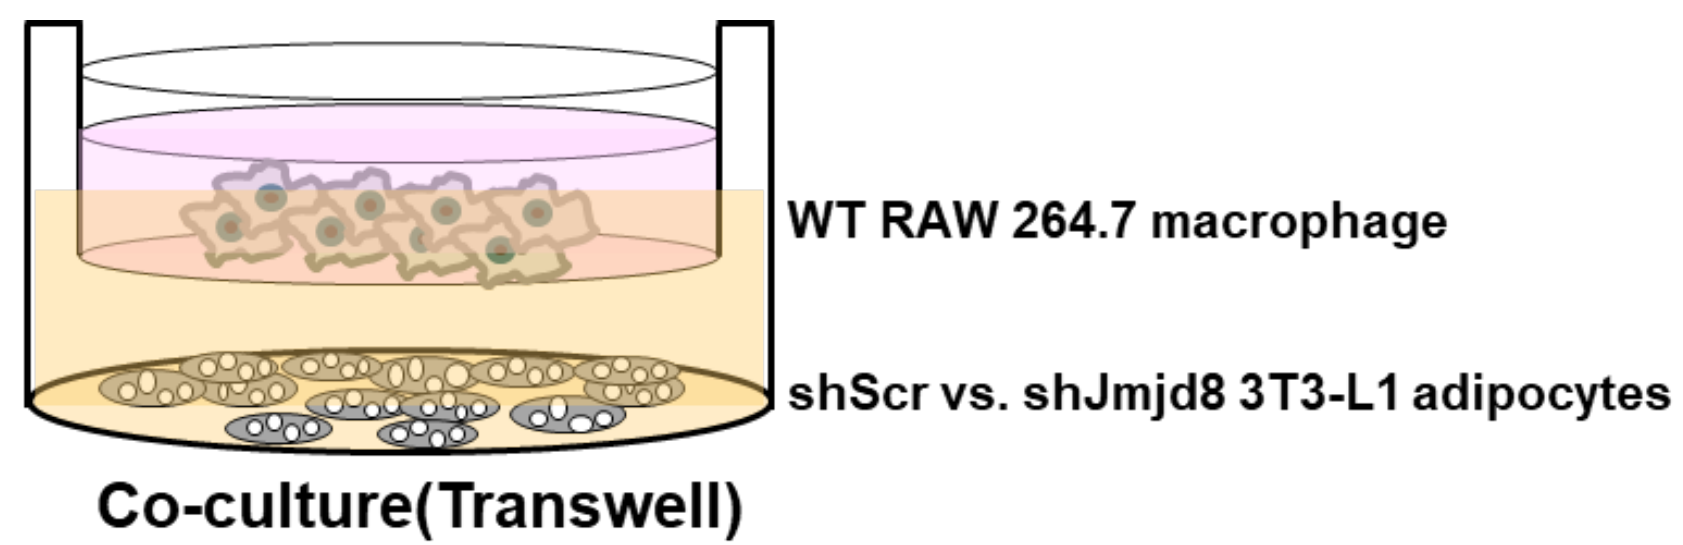

B

Raw cells

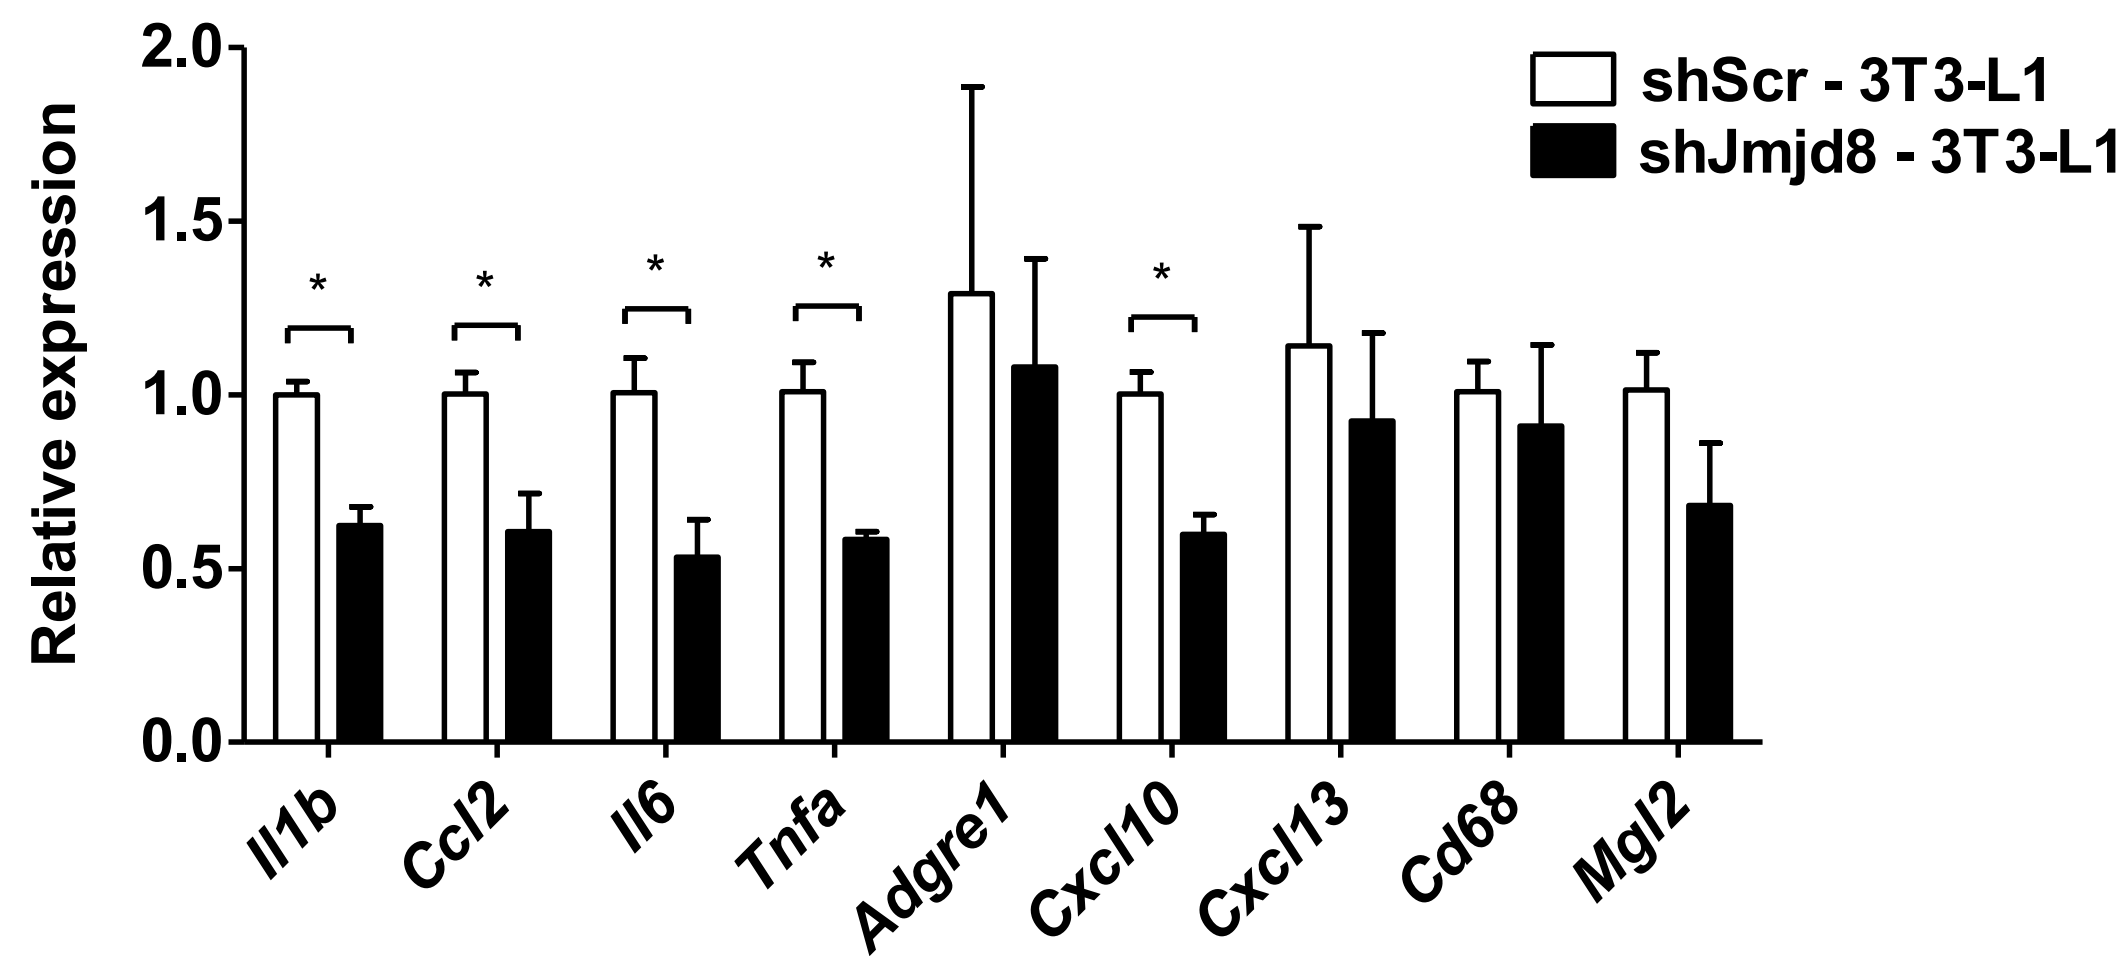

C

Raw cells

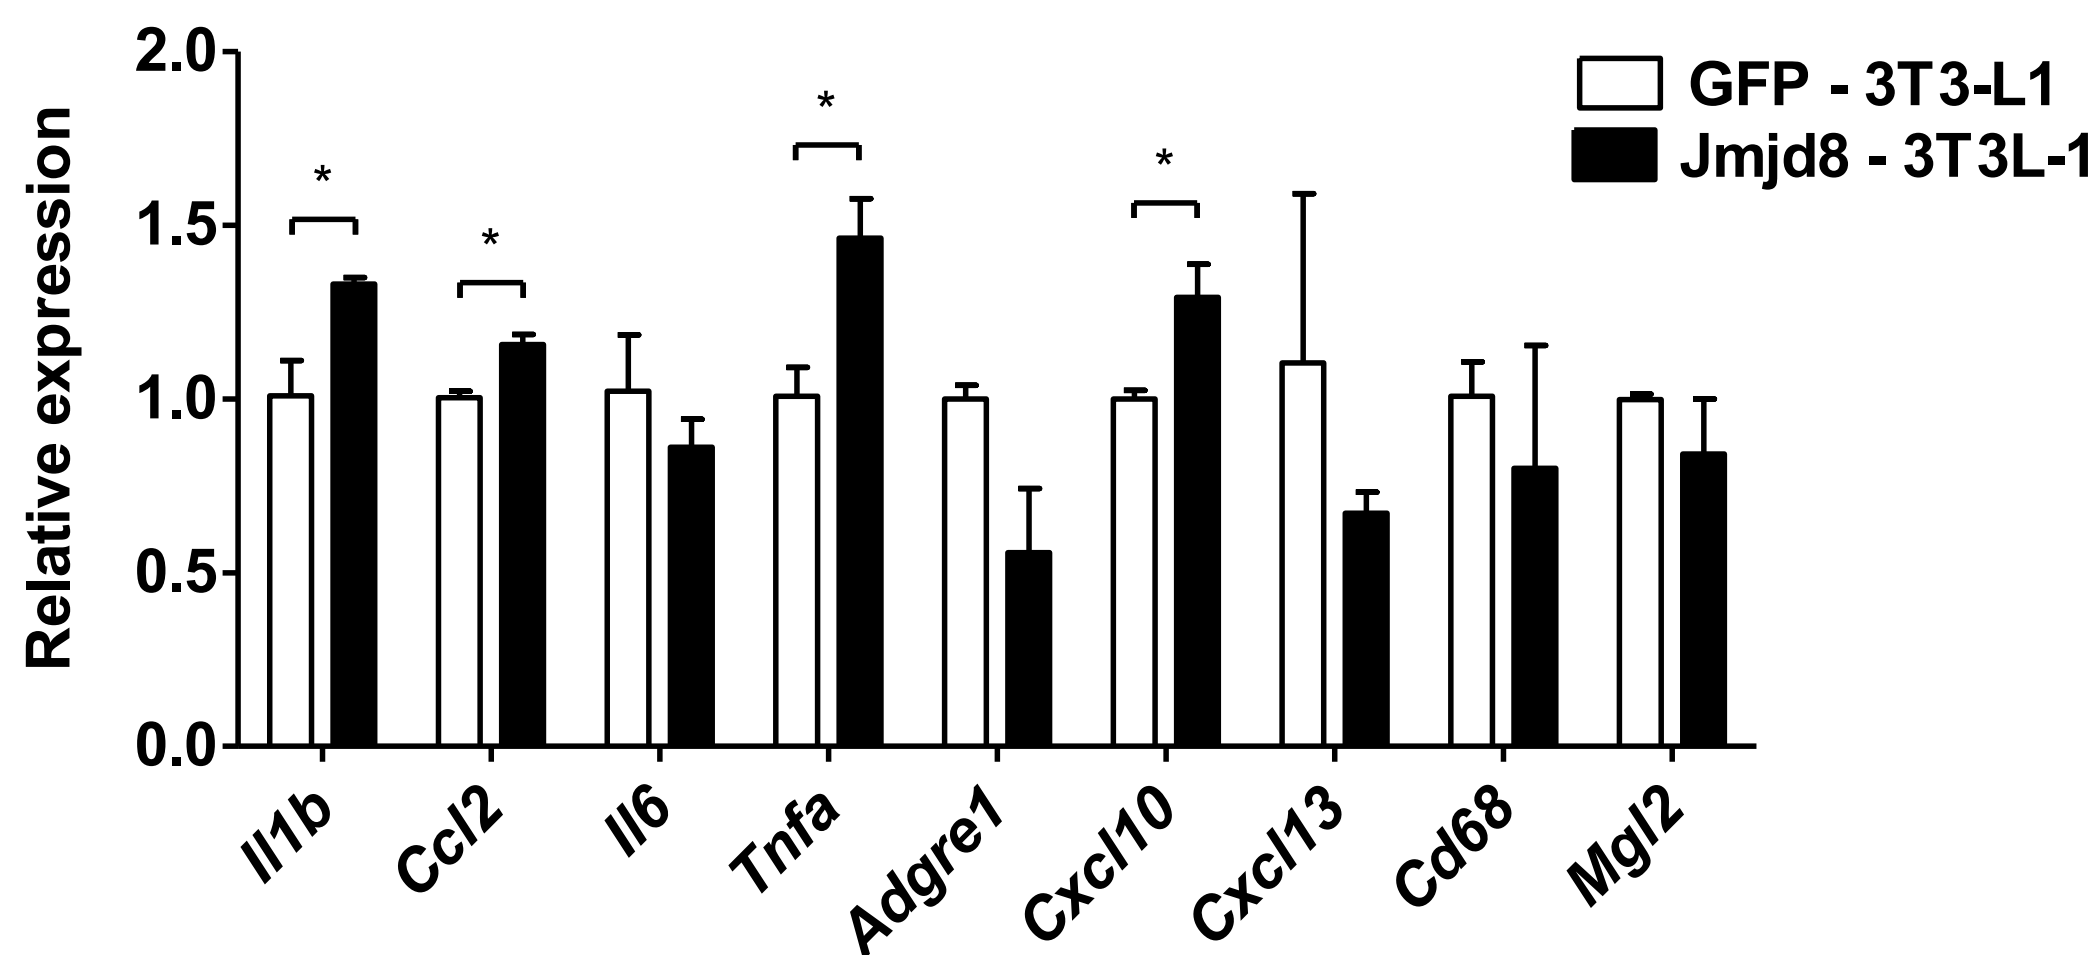

D

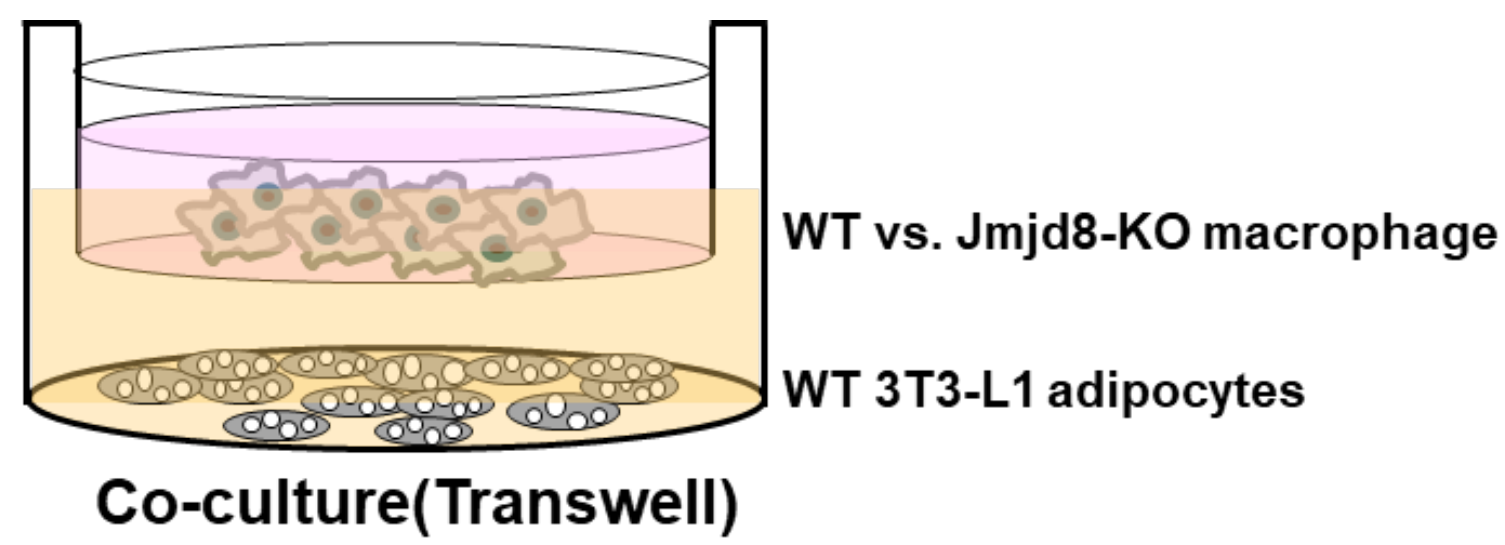

E

3T3-L1 adipocytes

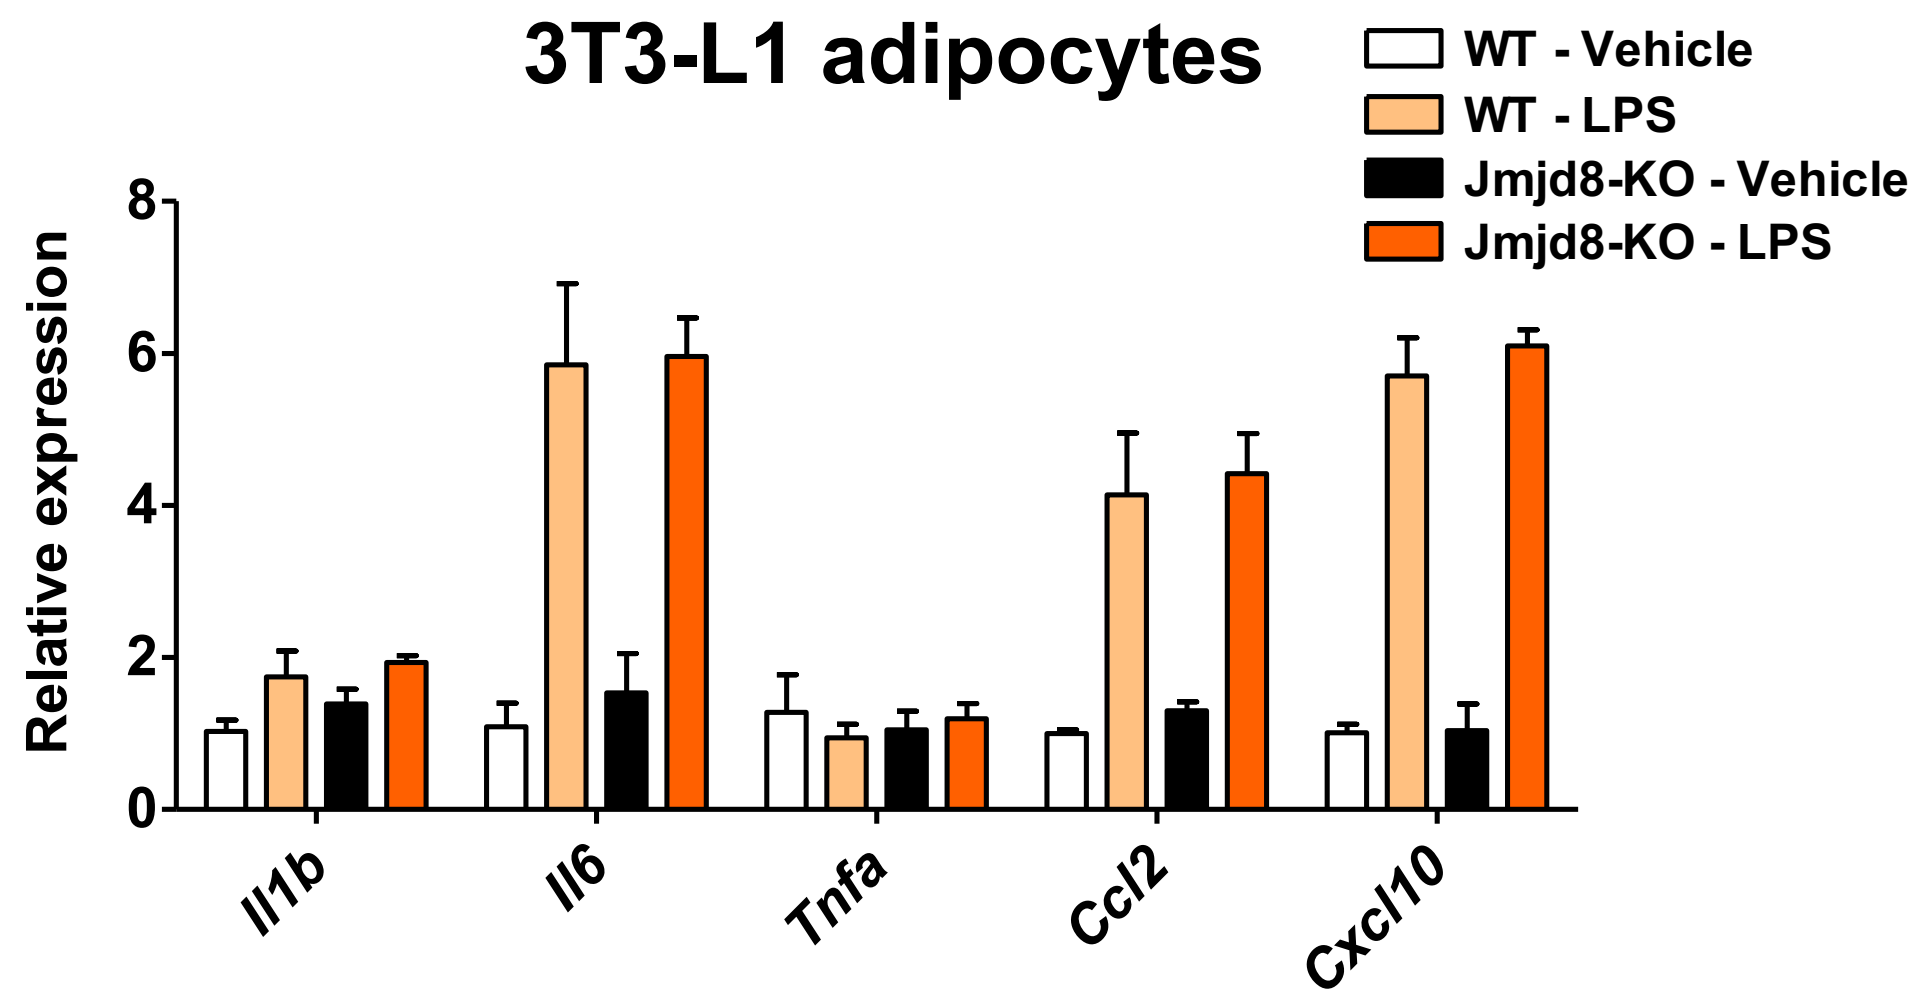

F

3T3-L1 adipocytes

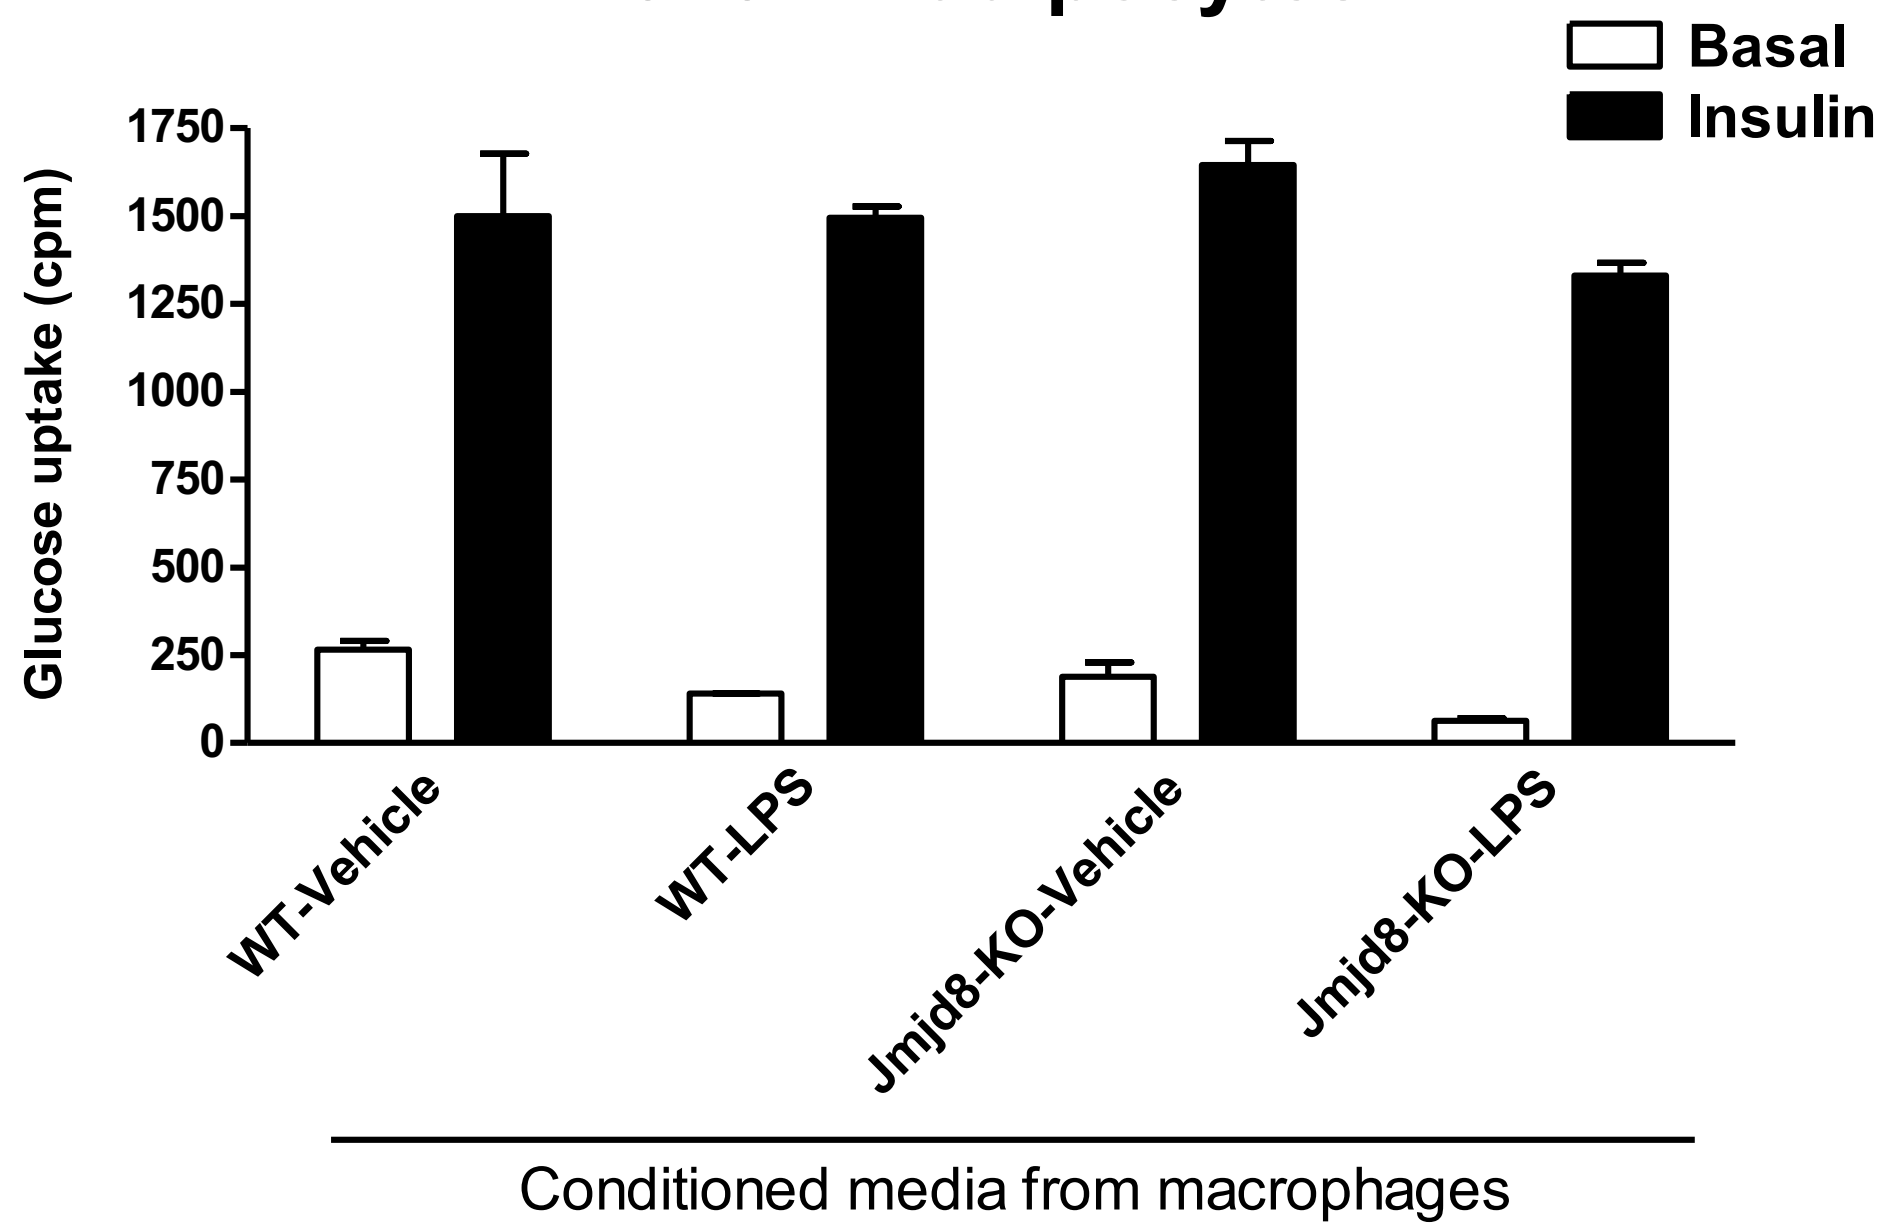

Supplemental Figure 11

A

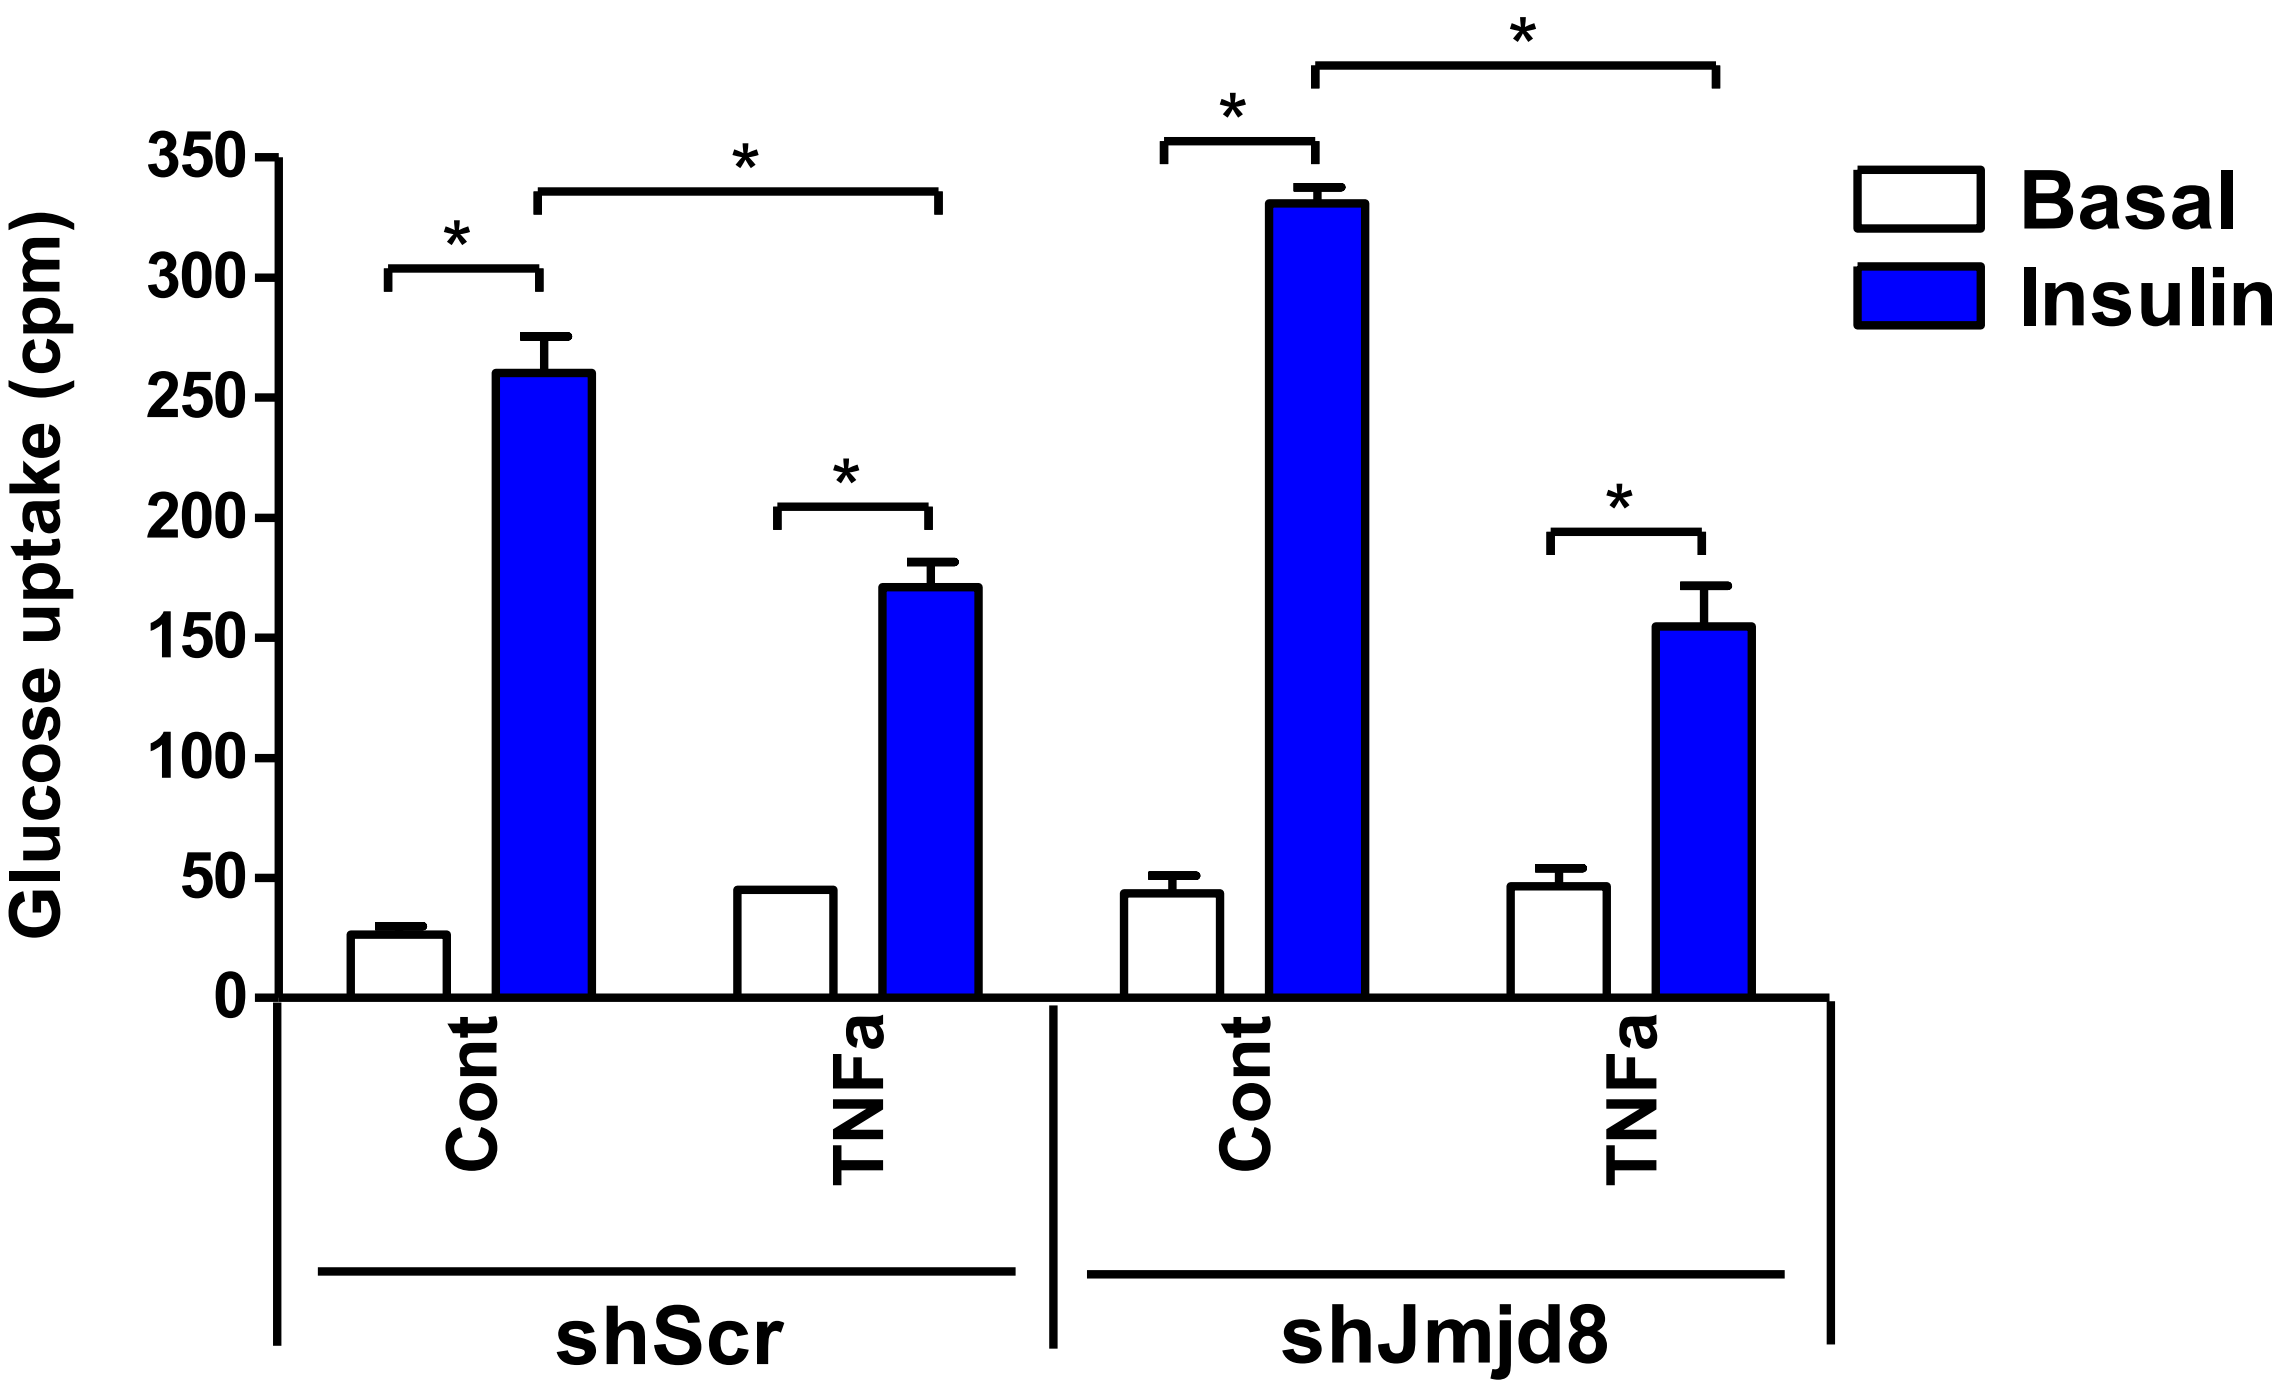

B

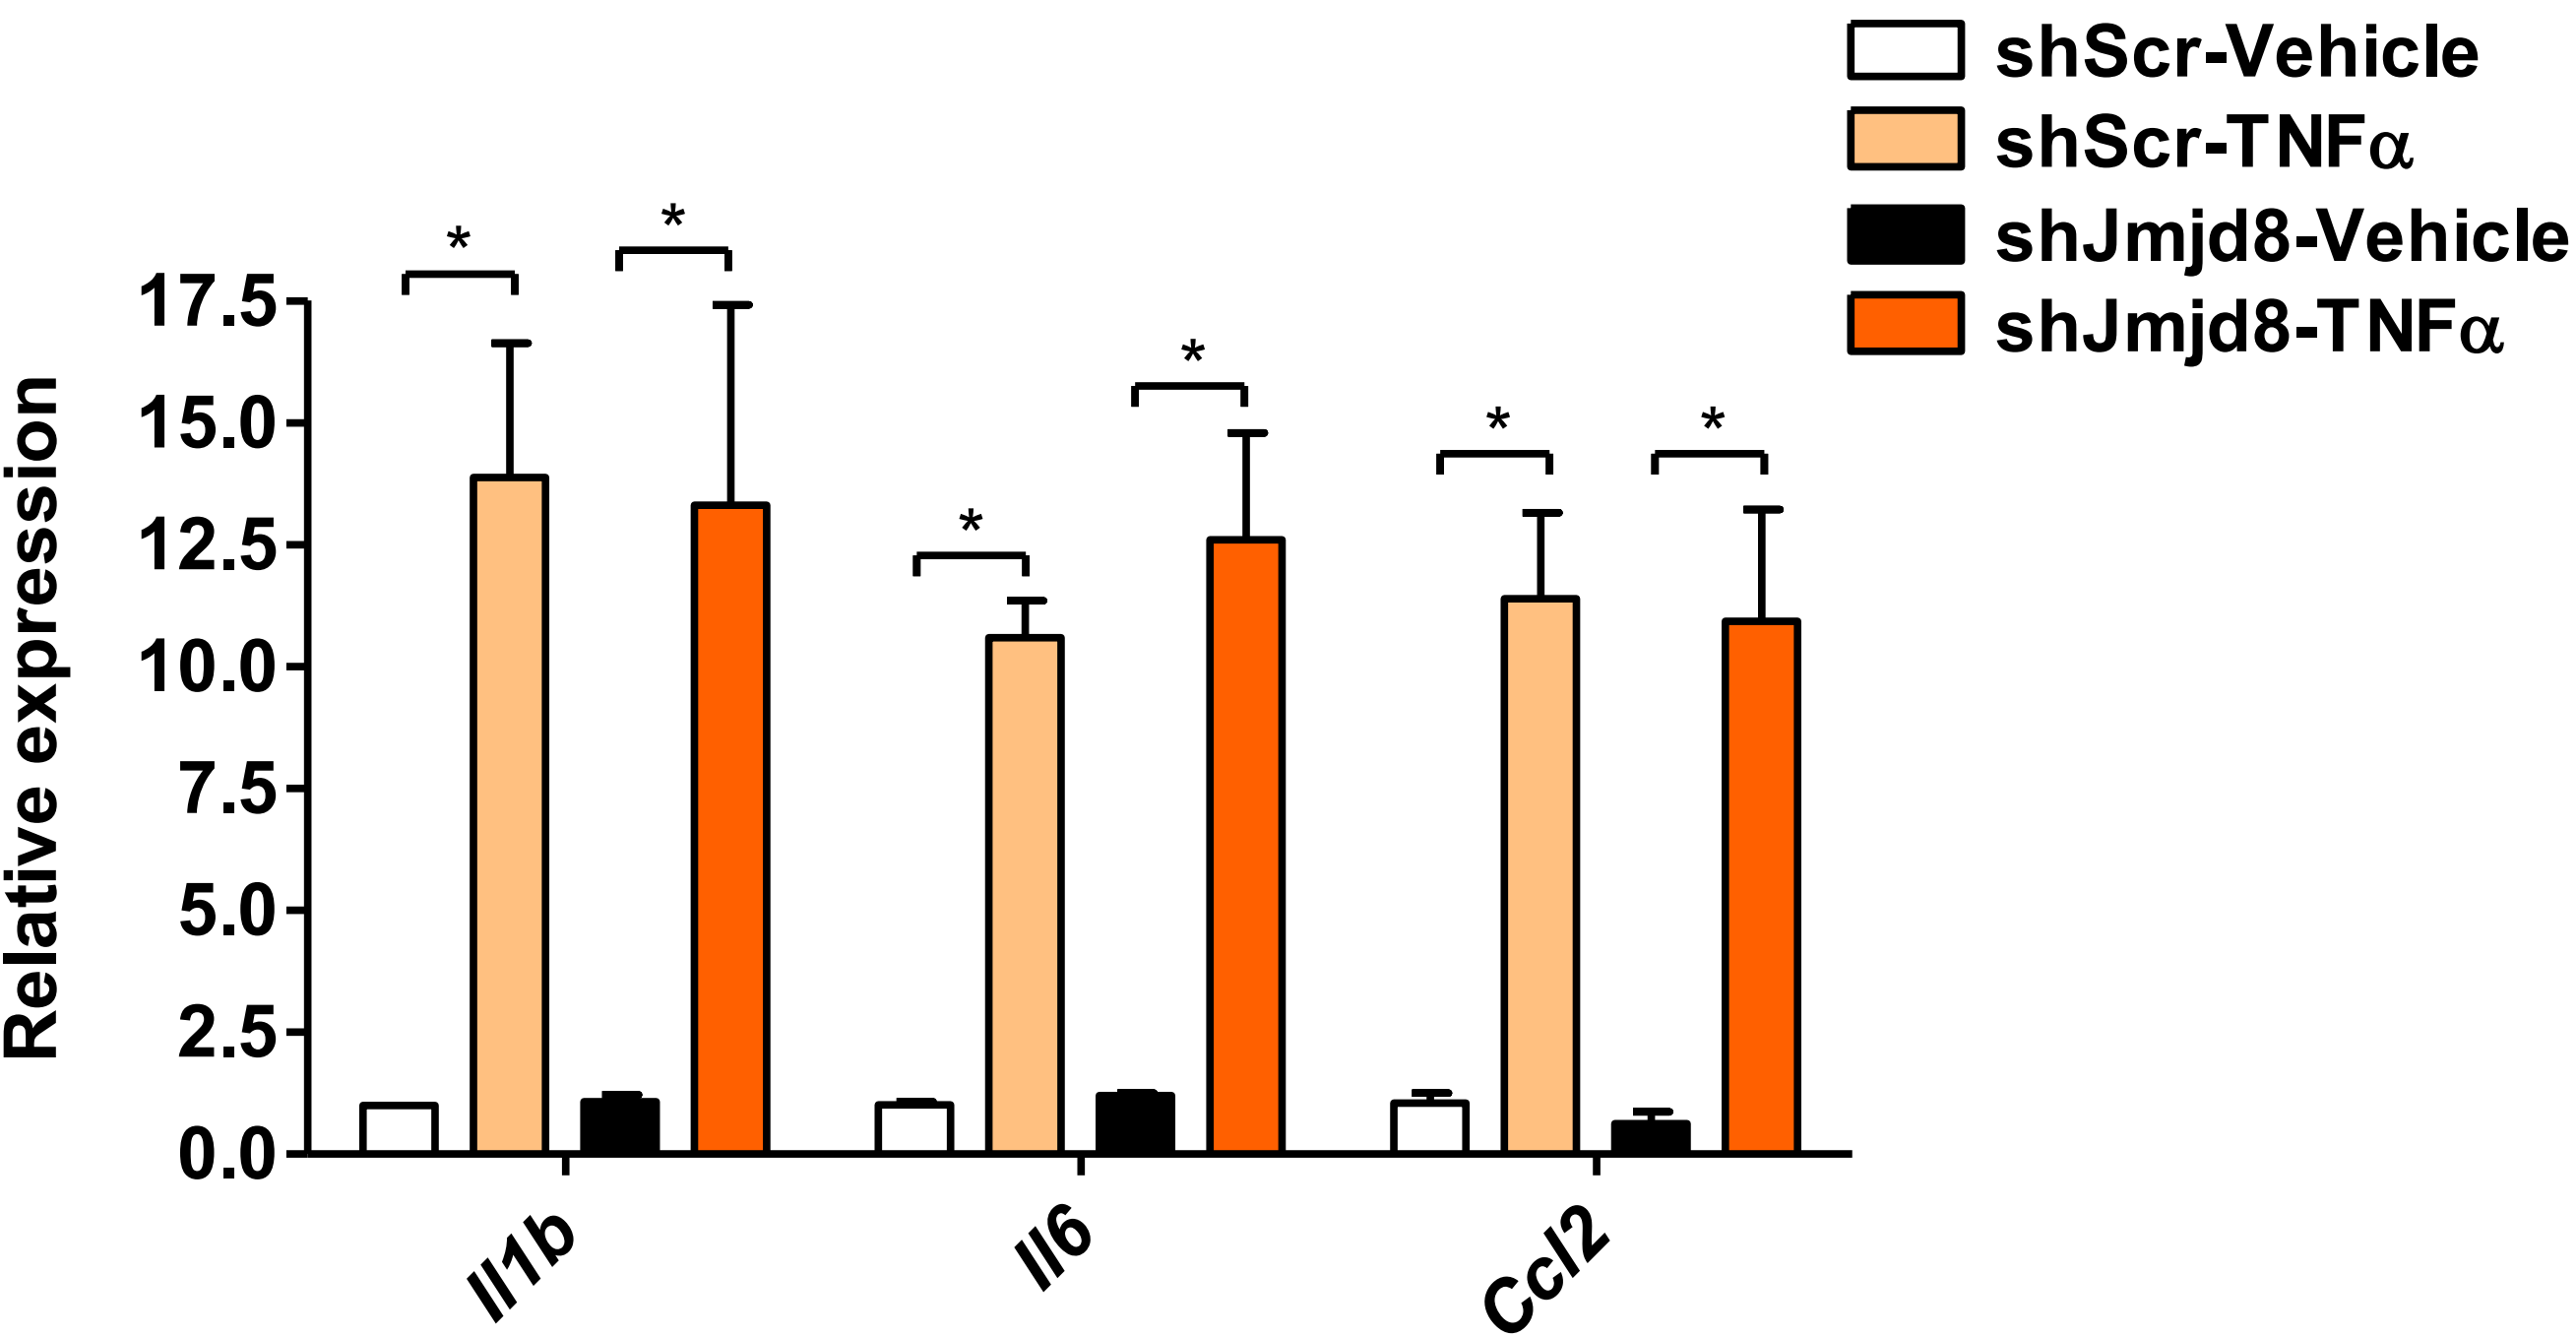



Supplemental Figure 12

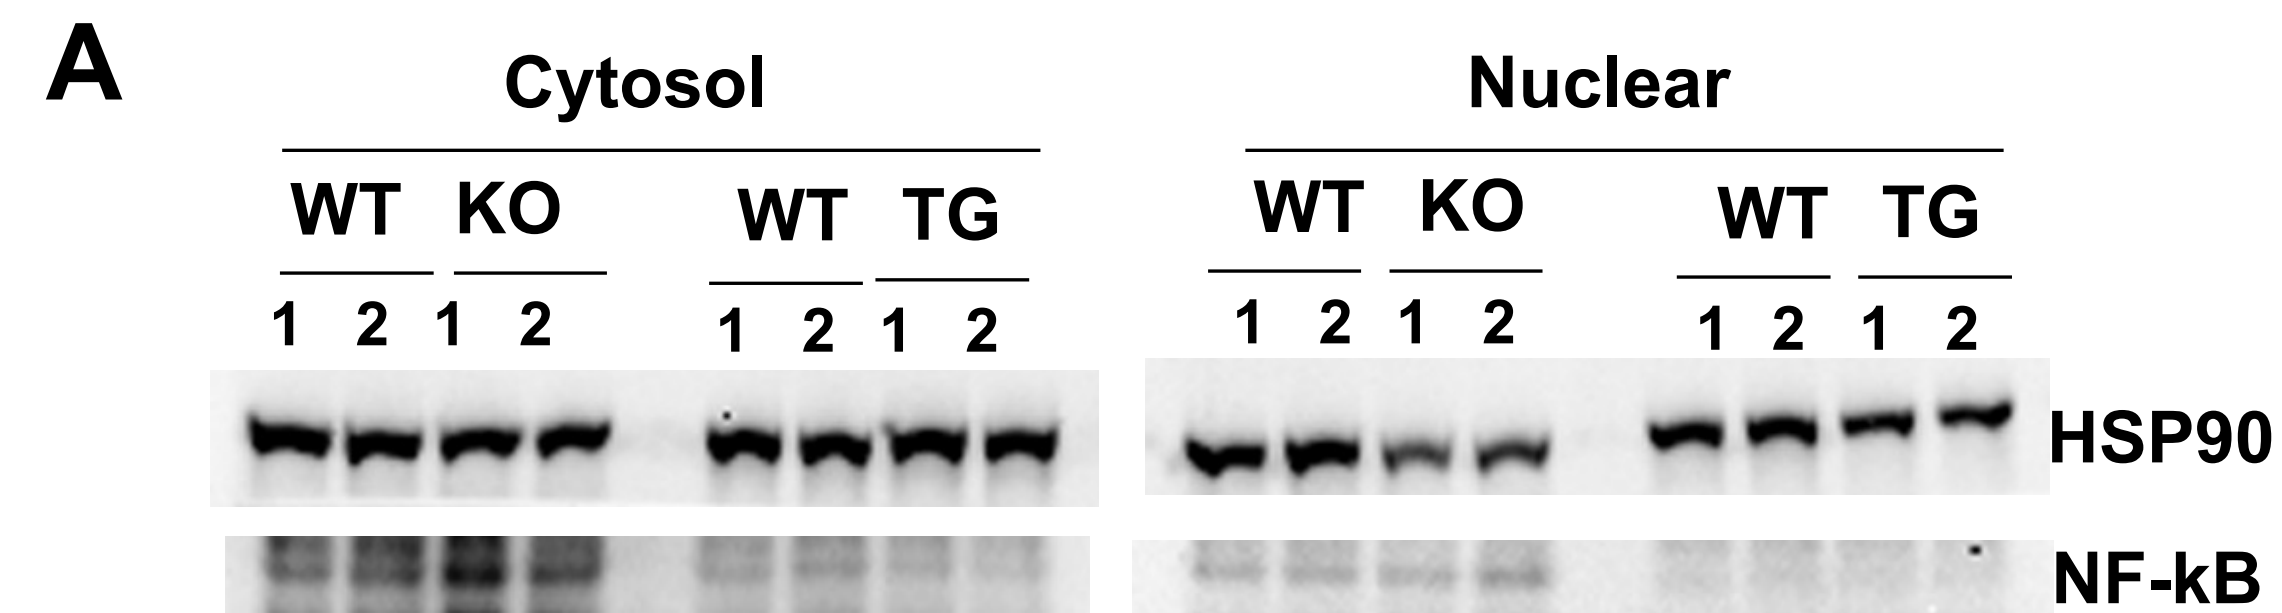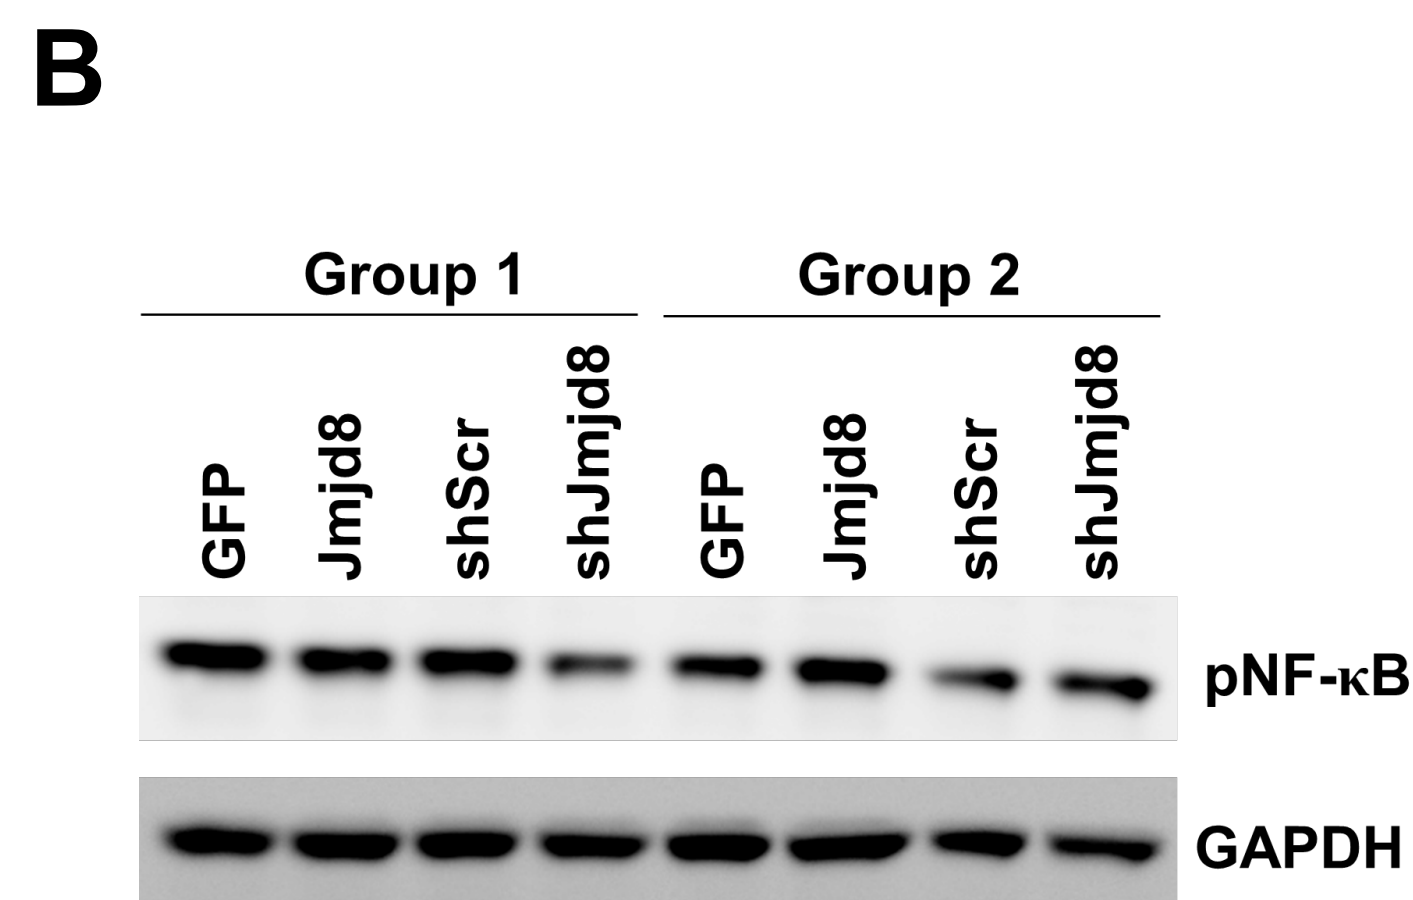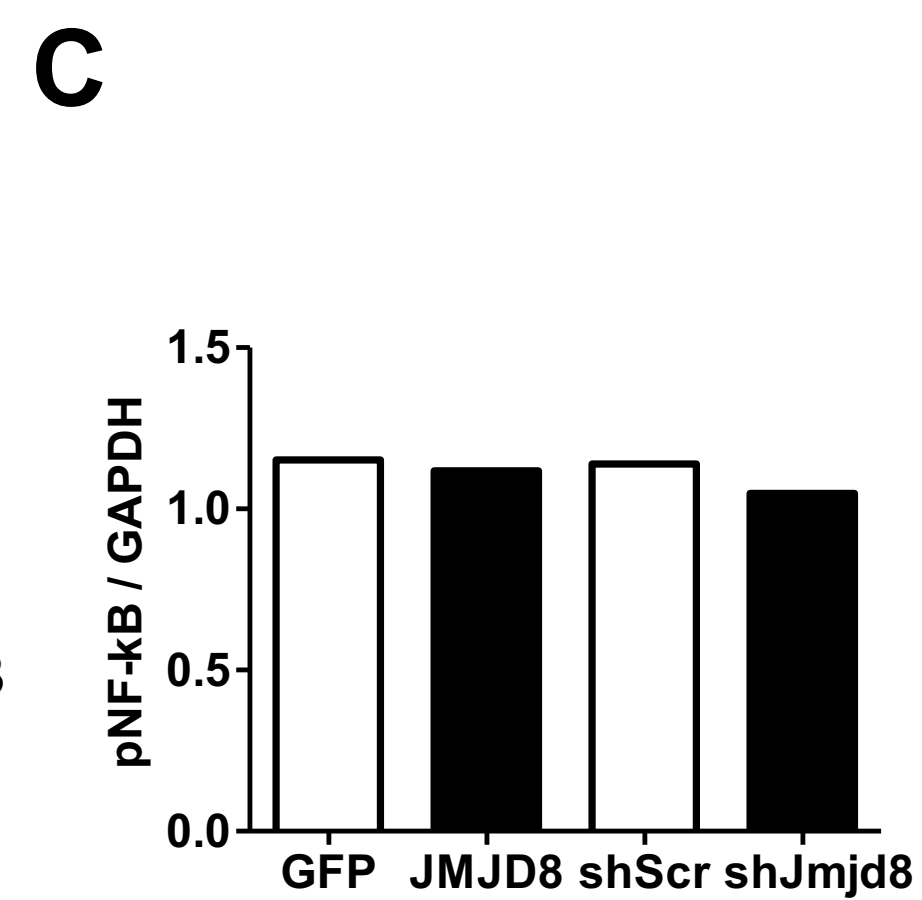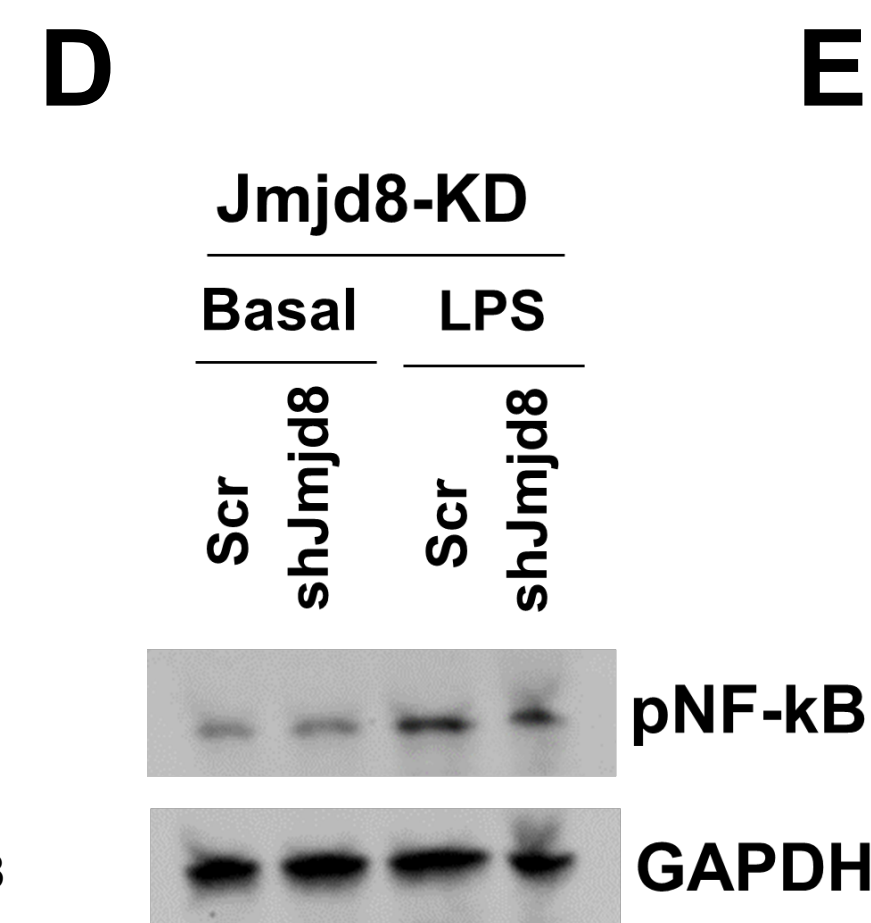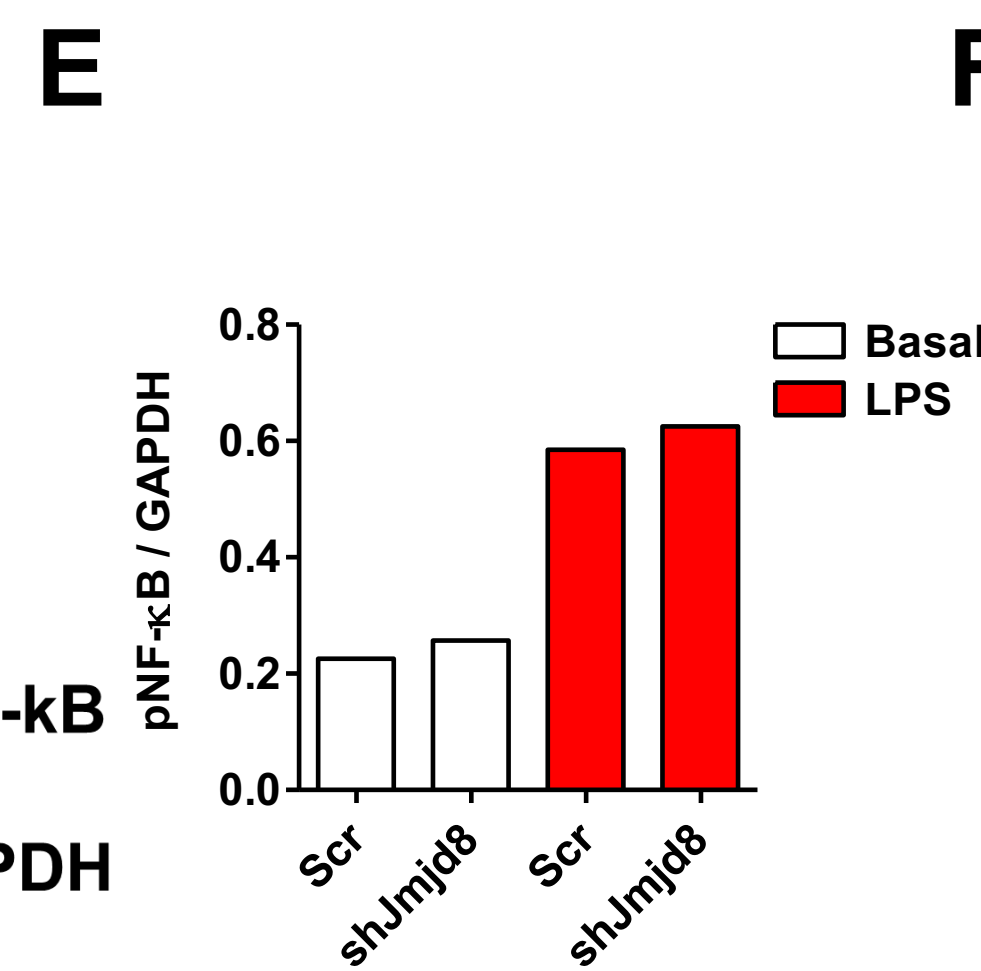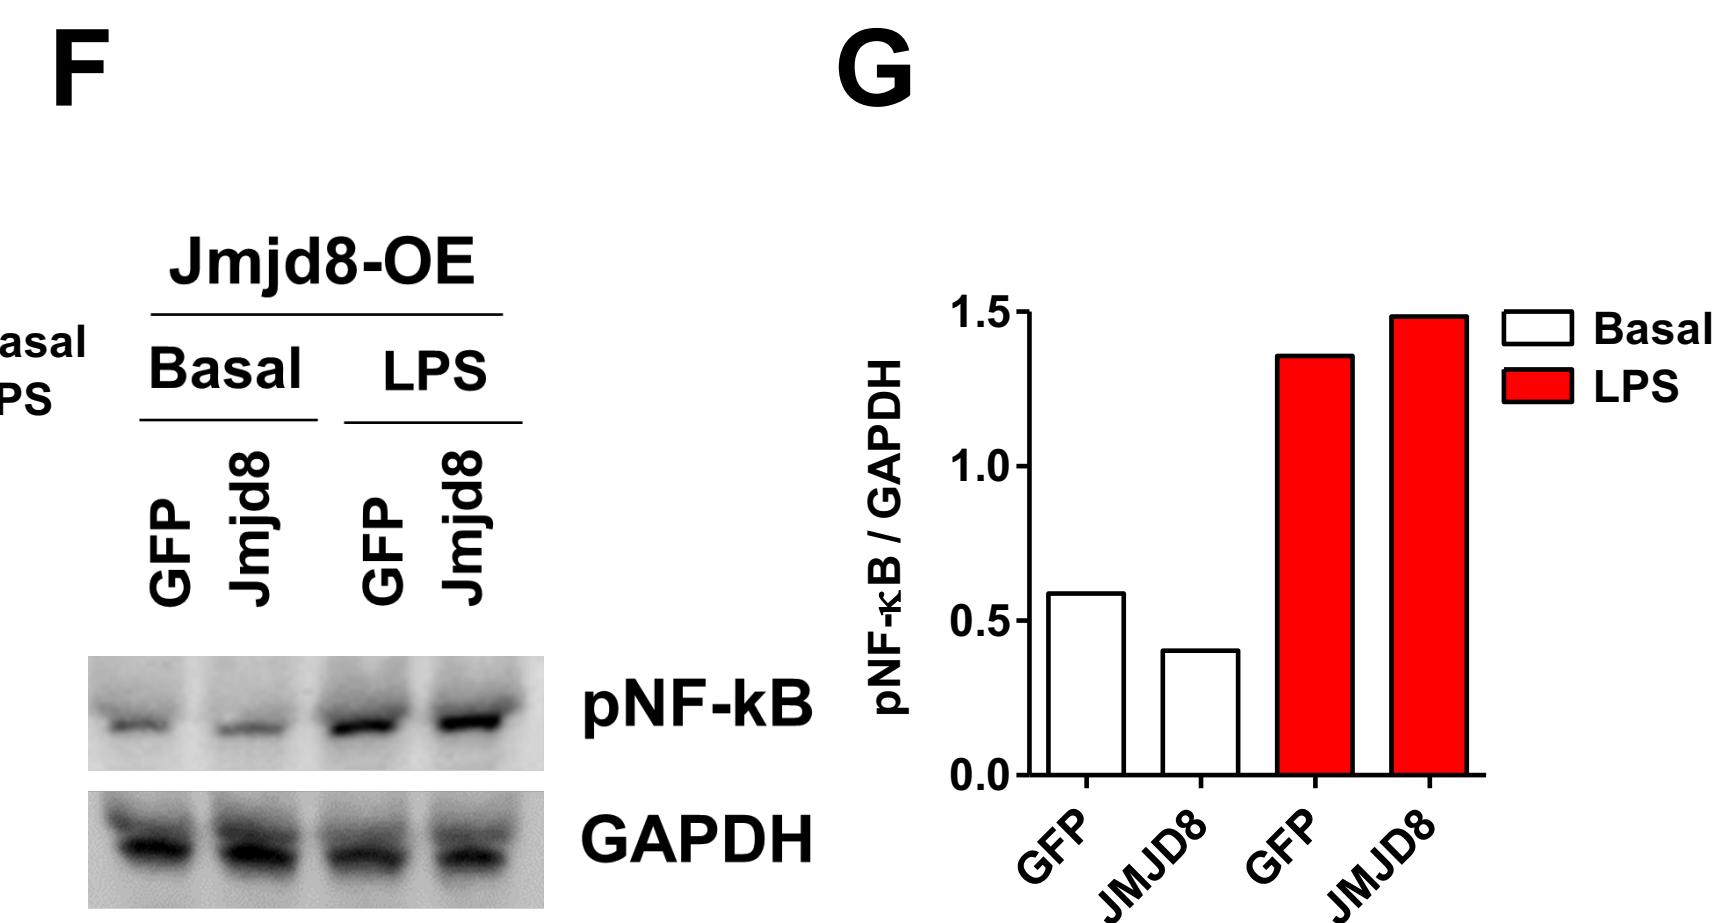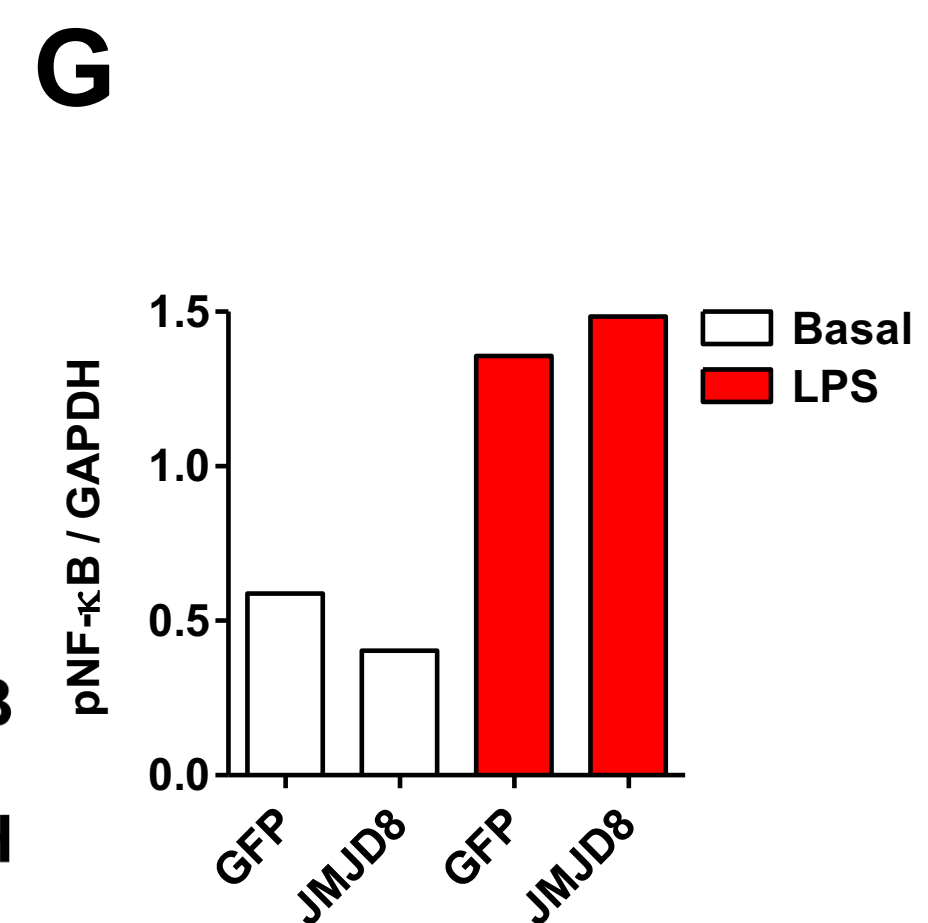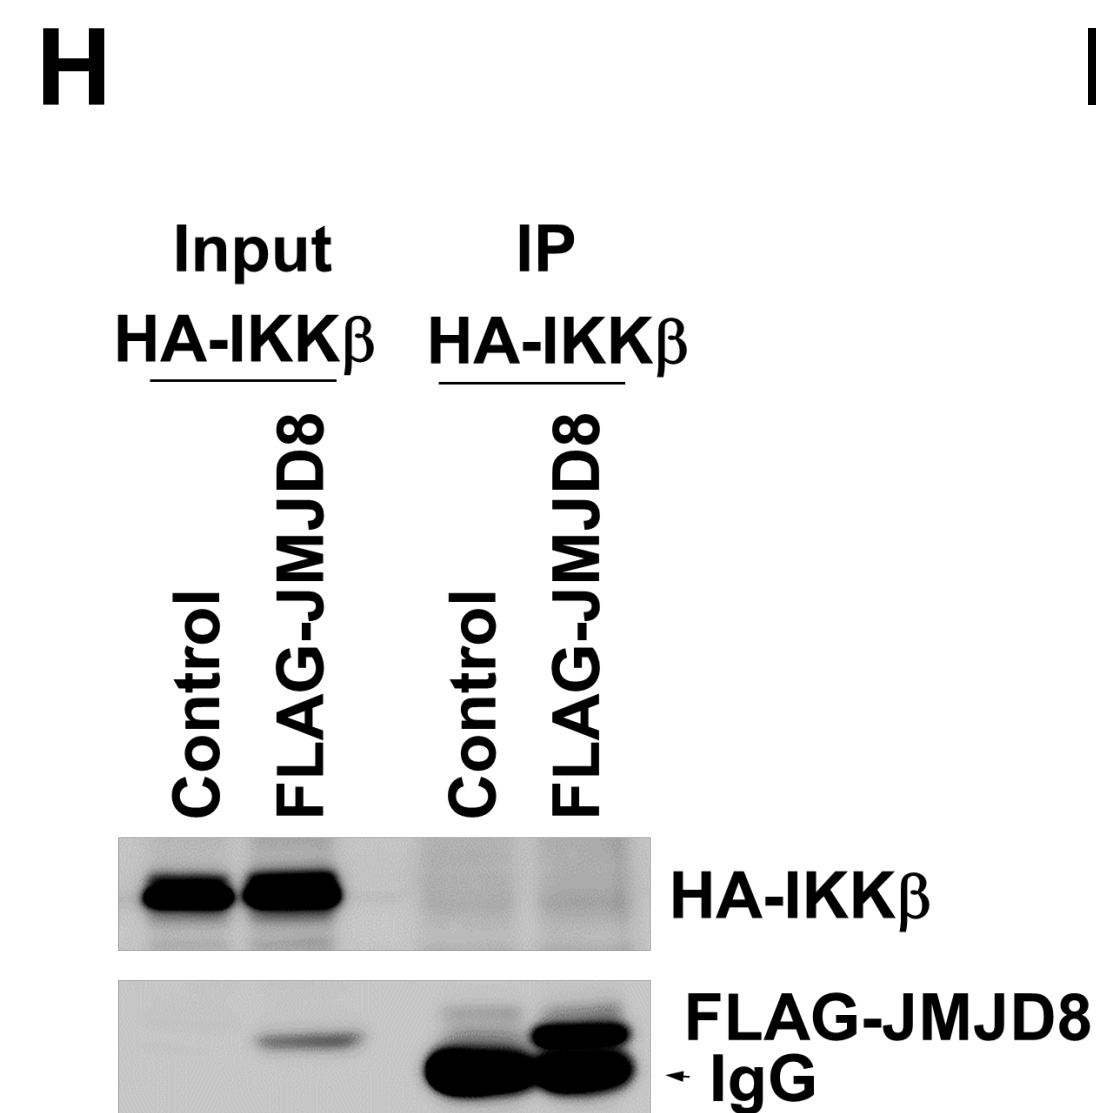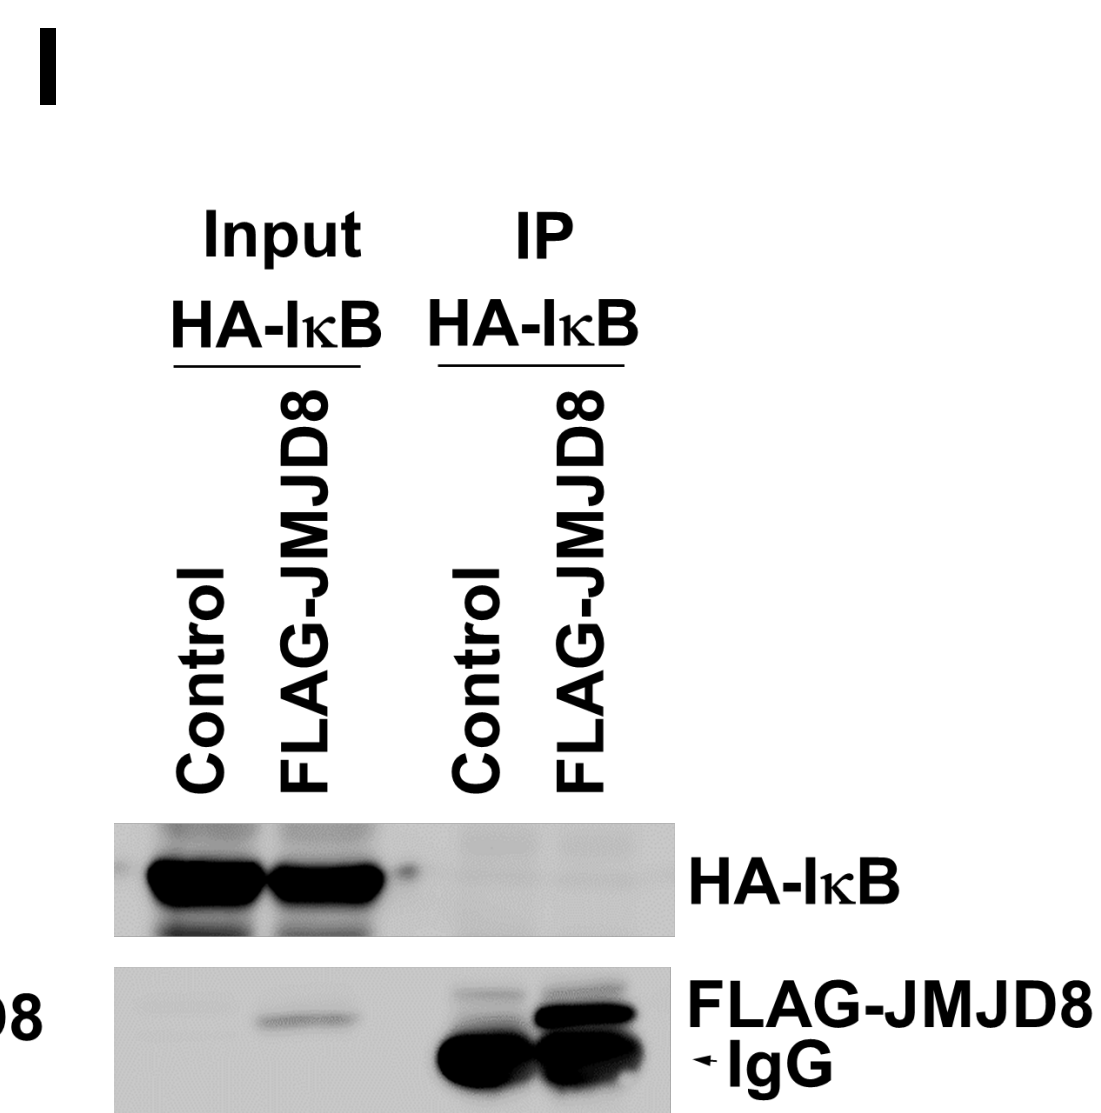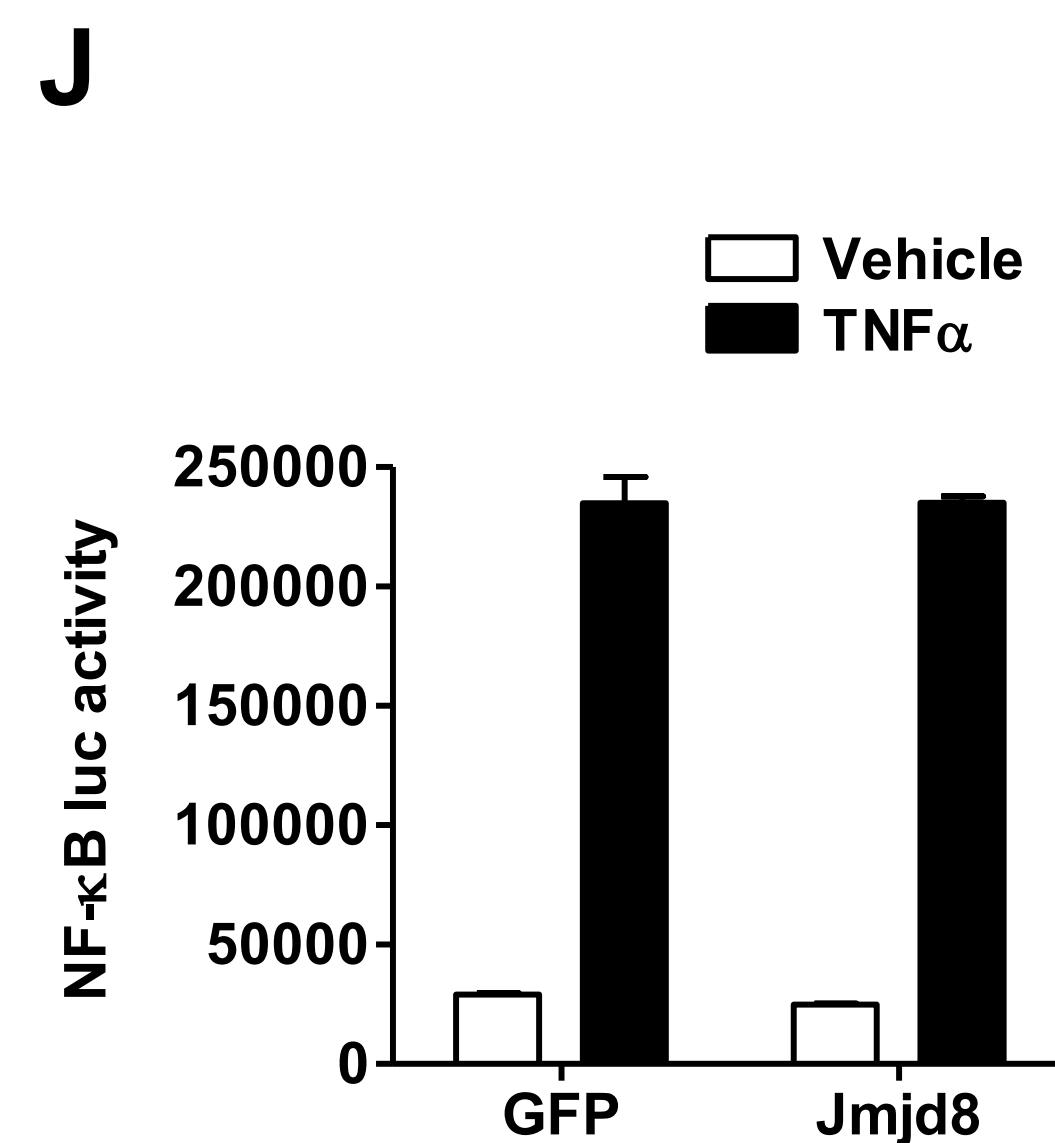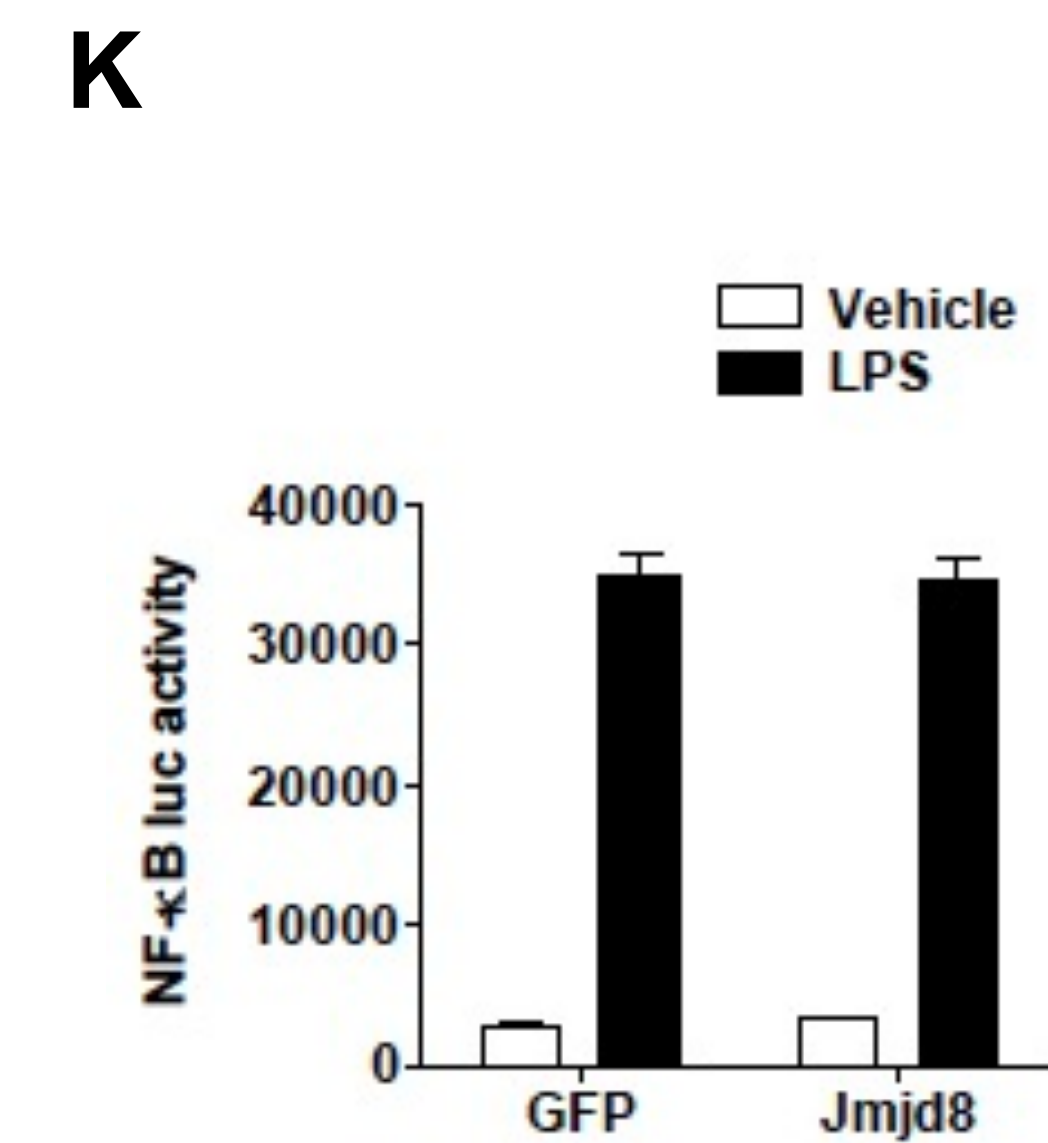

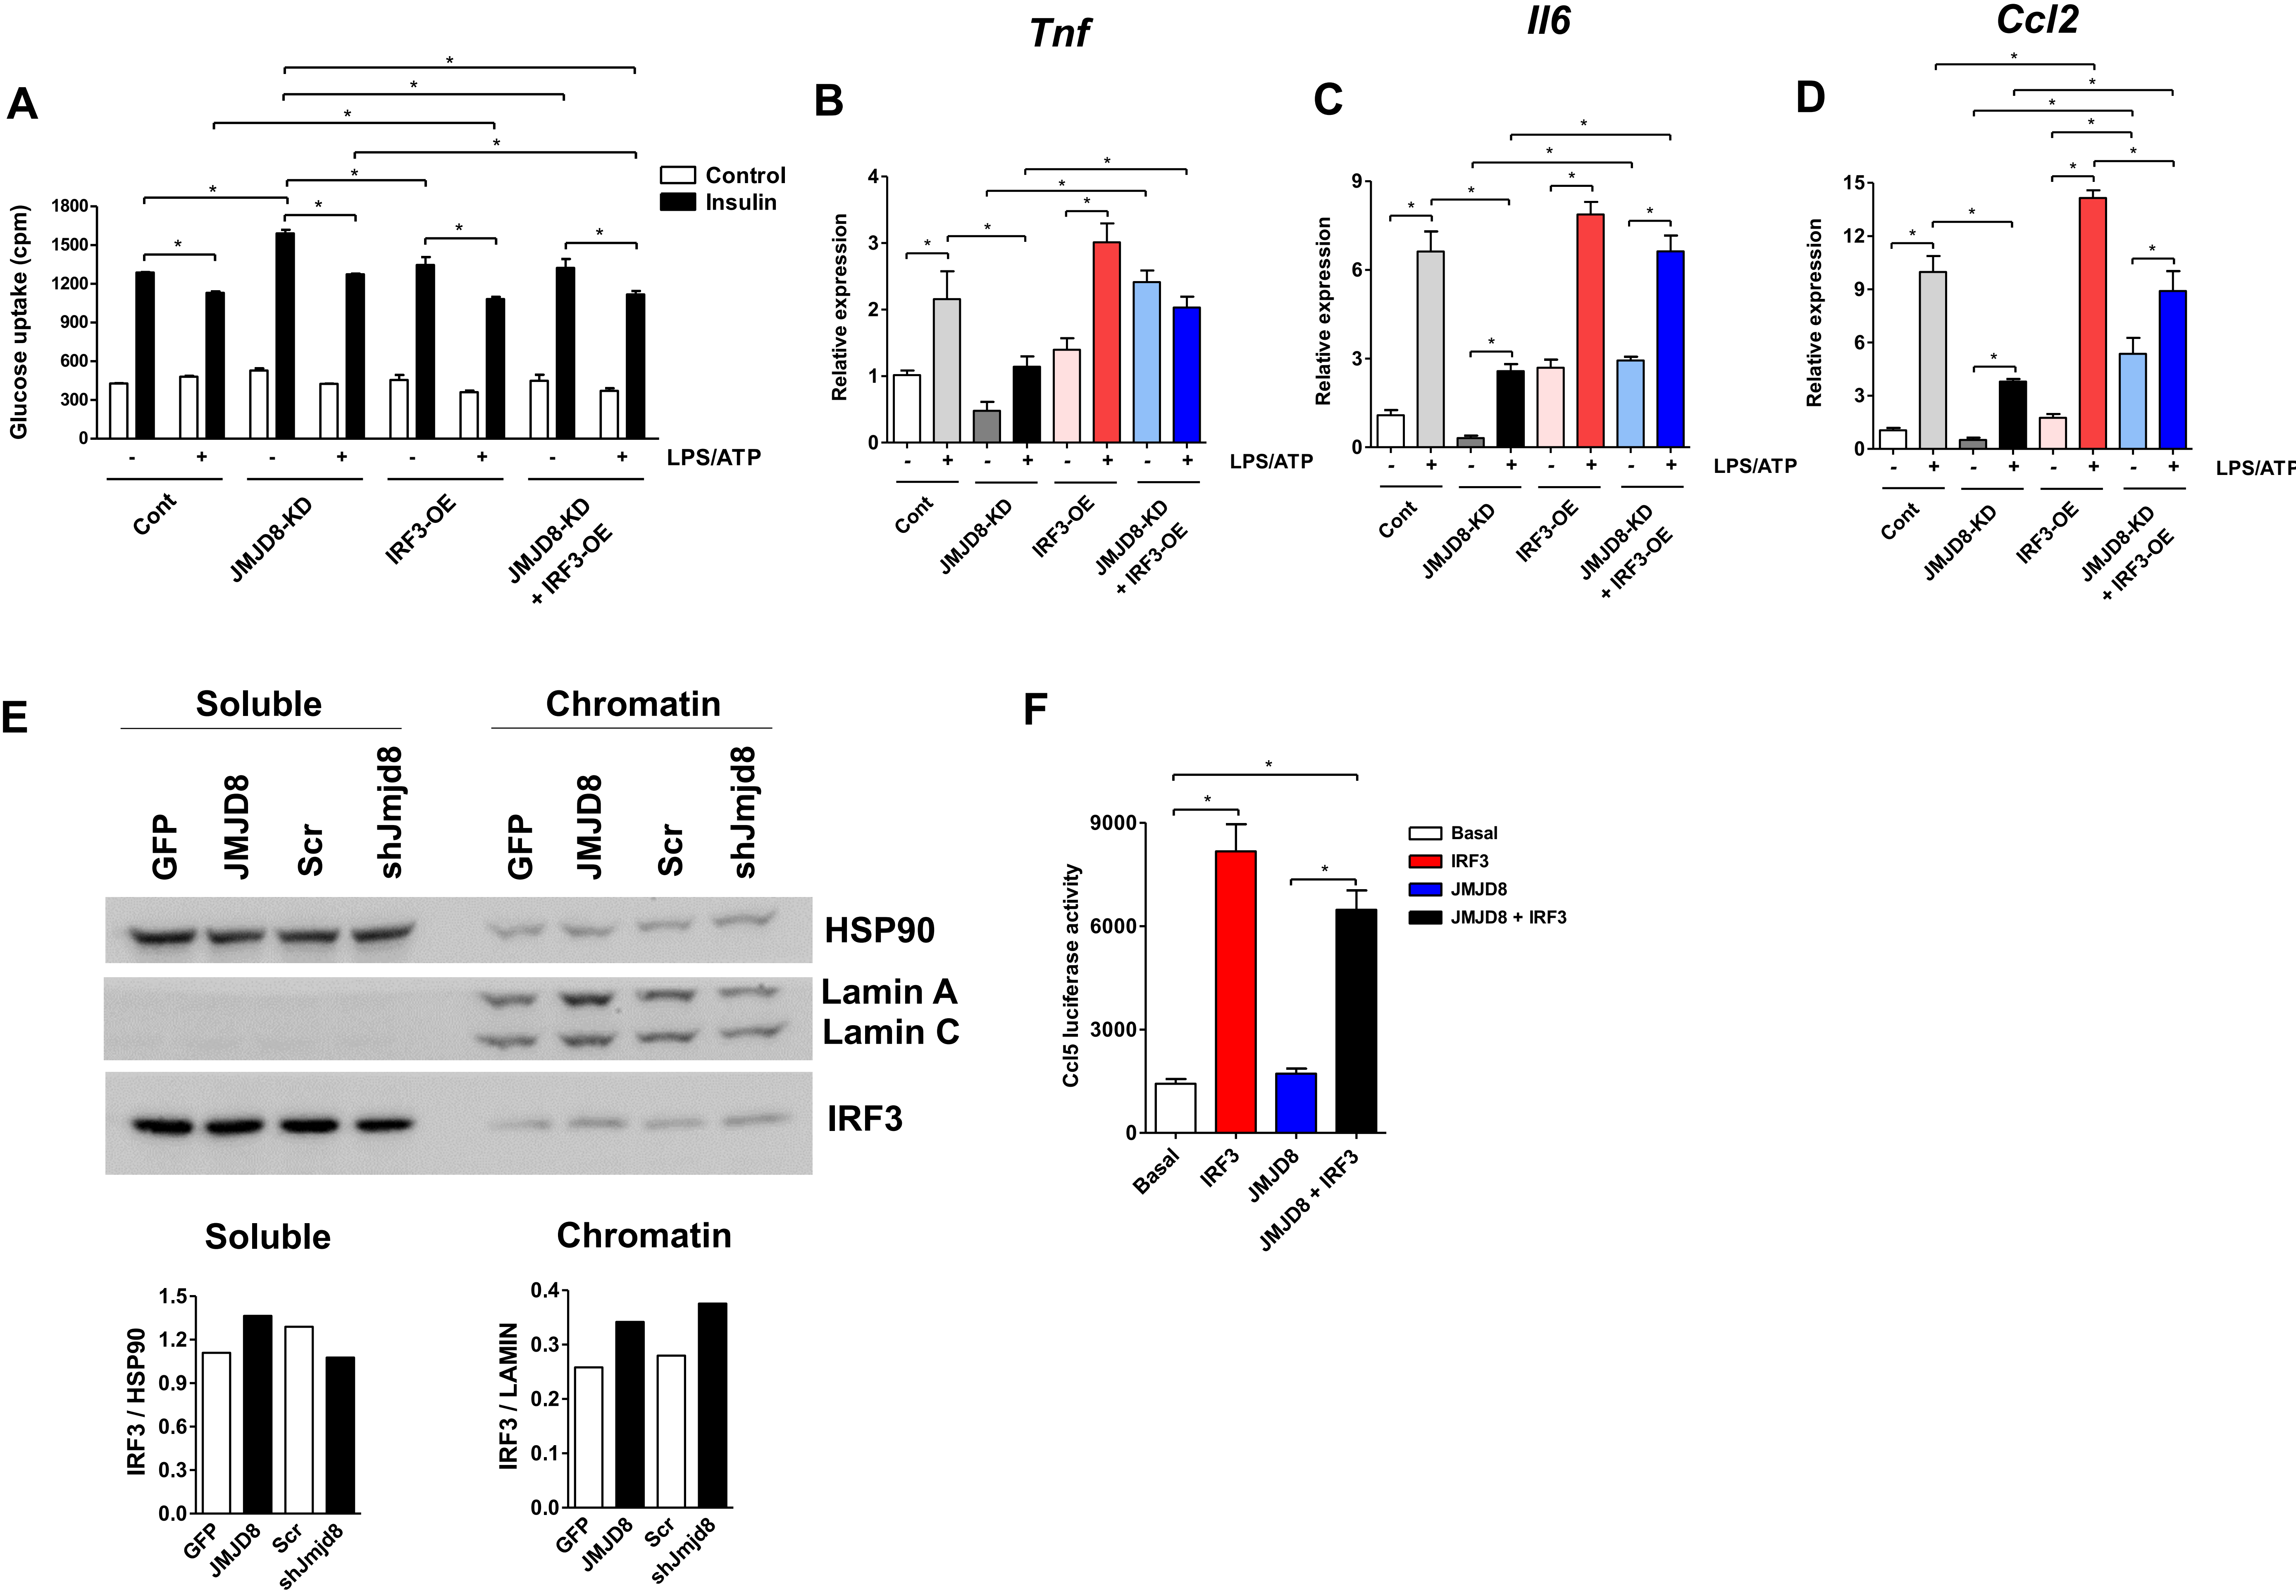

Supplement: Supplementary file 1 [file 1]
