# Supplementary material
Source: publisher figshare collection journal article supplement (https://diabetesjournals.figshare.com/articles/dataset/_/16810945)
Supplement: Supplementary file 2 [file 1]

**Supplemental Fig. 1. Inflammatory signals do not induce JMJD8 levels.** Mature 3T3-L1 adipocytes were treated with TNF $\alpha$  (10ng/ml), LPS (1ug/ml), and Palmitate (1mM) for 24 hour and assessed by qPCR and immunoblotting analysis.

**Supplemental Fig. 2. JMJD8 does not affect adipogenesis.** 3T3-L1 cells were infected prior to differentiation with shJmjd8 and control hairpins or GFP and JMJD8 overexpression viruses. On adipogenic day 8, lipid accumulation was assessed by Oil Red O staining (A, B), and adipocyte markers were measured by qPCR analysis (C). ( $n = 3$ ,  $p < 0.05$ , two-way ANOVA with Student's  $t$ -test, mean  $\pm$  s.e.m.).

**Supplemental Fig. 3. Knockdown and overexpression efficiency of *Jmjd8* loss- and gain-of-function models in 3T3-L1 adipocytes.** (A, B) *Jmjd8* mRNA and protein level in 3T3-L1 cells that were infected with shScr vs. shJmjd8 hairpins ( $n = 3$ ,  $p < 0.05$ , Student's  $t$ -test, mean  $\pm$  s.e.m.). (C) *Jmjd8* mRNA level in 3T3-L1 cells that were infected with gCon vs. gJMJD8 or GFP vs. JMJD8 lentiviruses ( $n = 3$ ,  $p < 0.05$ , Student's  $t$ -test, mean  $\pm$  s.e.m.). (D, E) *Jmjd8* mRNA and protein level in 3T3-L1 cells that were infected with GFP vs. JMJD8 lentiviruses ( $n = 3$ ,  $p < 0.05$ , Student's  $t$ -test, mean  $\pm$  s.e.m.).

**Supplemental Fig. 4. Establishment of *Jmjd8*-knockout mice.** (A) Deleted regions, as shown by Sanger sequencing, of the *Jmjd8*-knockout founder mouse. (B) Body weight of WT and *Jmjd8*-KO mice on chow ( $n = 5$  mice,  $p < 0.05$ , two-way ANOVA with Student's  $t$ -test, mean  $\pm$  s.e.m.). (C) Body composition of WT and *Jmjd8*-KO mice on chow ( $n = 8$  mice,  $p < 0.05$ , two-way ANOVA with Student's  $t$ -test, mean  $\pm$  s.e.m.). (D) Tissue weight per body weight of WT and *Jmjd8*-KO mice on chow ( $n = 4$ , 3 mice,  $p < 0.05$ , two-way ANOVA with Student's  $t$ -test, mean  $\pm$  s.e.m.).

**Supplemental Fig. 5. Energy homeostasis in *Jmjd8*-KO and WT mice on HFD.** VO<sub>2</sub> (A, B), VCO<sub>2</sub> (C, D), energy expenditure (E, F), locomotor activity (G, H), and food consumption (I) measurements on WT and *Jmjd8*-KO mice on HFD ( $n = 8$  mice,  $p < 0.05$ , Student's  $t$ -test, mean  $\pm$  s.e.m.).

**Supplemental Fig. 6. Insulin signal transduction is not impaired in non-adipose tissue of *Jmjd8*-KO mice.** Immunoblot of total and phospho-AKT in muscle (A, B), liver (C, D), and BAT (E, F) from WT and *Jmjd8*-KO mice on HFD after IP injection of insulin (10 U/kg, 10 min) ( $n = 2$ , 3 mice). Quantification of western blot in (A) ( $p < 0.05$ , two-way ANOVA with Student's  $t$ -test, mean  $\pm$  s.e.m.). (G) Pyruvate tolerance test for WT and *Jmjd8*-KO mice on HFD ( $n = 5$  mice,  $p < 0.05$ , two-way ANOVA with Student's  $t$ -test, mean  $\pm$  s.e.m.).

**Supplemental Fig. 7. Generation of adipocyte-specific *Jmjd8* transgenic mice.** The *Jmjd8* transgene tagged with the Ty1 epitope was constructed in a pCAG-loxPStopLoxP vector, whose expression is driven by the CAG promoter upon Cre expression. Linearized transgene plasmid was microinjected into fertilized eggs under direct visualization and implanted into the uterus of pseudopregnant female mice. A heterozygous founder was crossed with adiponectin-Cre mice to generate the WT (Tg/+AdiCre-) and transgenic (Tg/+AdiCre+) cohort.

**Supplemental Fig. 8. Energy homeostasis in Adi-Jmjd8 TG and WT mice is unchanged on HFD.** VO<sub>2</sub> (A, B), VCO<sub>2</sub> (C, D), energy expenditure (E, F), locomotor activity (G, H), and food consumption (I) measurements on WT and Adi-Jmjd8 TG mice on HFD. ( $n = 7$ , 6 mice,  $p < 0.05$ , Student's  $t$ -test, mean  $\pm$  s.e.m.).

**Supplemental Fig. 9. Additional immune gene expression from obese *Jmjd8*-KO and Adi-*Jmjd8* TG mice.** The qPCR measurement of immune genes in WT and *Jmjd8*-KO mice on HFD (A), and in WT and Adi-*Jmjd8* TG mice on HFD (B). ( $n = 3$ ,  $p < 0.05$ , Student's *t*-test, mean  $\pm$  s.e.m.).

**Supplemental Fig. 10. The proinflammatory action of JMJD8 originates from adipocytes.** (A) Co-culture of wild-type RAW264.7 macrophages with L1 adipocytes with altered *Jmjd8* levels. WT RAW264.7 macrophages in the Transwell were co-cultured with L1 adipocytes that had *Jmjd8* knocked down (B) or overexpressed (C) for 24 hours. Shown is the qPCR measurement of inflammatory genes in WT RAW264.7 macrophages from B and C ( $n = 3$ ,  $p < 0.05$ , Student's *t*-test, mean  $\pm$  s.e.m.). (D) Co-culture of wild-type 3T3-L1 with *Jmjd8* WT vs. KO macrophages. WT 3T3-L1 adipocytes were co-cultured with WT vs. *Jmjd8*-KO macrophages stimulated with LPS (10 ng/ml) or vehicle for 24 hours. (E) Shown is the qPCR measurement of inflammatory genes in L1 adipocytes from D ( $n = 3$ ,  $p < 0.05$ , two-way ANOVA with Student's *t*-test, mean  $\pm$  s.e.m.). (F) The basal and insulin-stimulated glucose uptake, assessed by a  $^3\text{H}$ -2-DG assay in L1 adipocytes from D ( $n = 2, 4$ ,  $p < 0.05$ , two-way ANOVA with Student's *t*-test, mean  $\pm$  s.e.m.).

**Supplemental Fig. 11. JMJD8 is not required for the TNF $\alpha$ -stimulated expression of inflammatory gene expression and insulin resistance.** Mature 3T3-L1 adipocytes were lentivirally infected with shScr vs. sh*Jmjd8* and were treated with TNF $\alpha$  (5ng/ml) or vehicle for 3 days. Glucose uptake results (A) and gene expression analysis of proinflammatory genes (B). ( $n = 3$ ,  $p < 0.05$ , two-way ANOVA with Student's *t*-test, mean  $\pm$  s.e.m.).

**Supplemental Fig. 12. JMJD8 does not affect the NF- $\kappa$ B signaling pathways.** (A) Immunoblotting of JMJD8 protein from the nuclear and cytosolic fractions of obese WT vs. KO eWAT, and WT vs. Adi-*Jmjd8*-TG mice ( $n = 2$  mice). (B, C) Western blot analysis and quantification of pNF- $\kappa$ B level in *Jmjd8* knockdown or JMJD8 overexpressing 3T3-L1 adipocytes. GAPDH was used as a loading control ( $n = 2$  per genetic manipulation). (D-G) Western blot analysis of pNF- $\kappa$ B level with or without LPS (1ug/ml) treatment for 30 min in *Jmjd8* knockdown or JMJD8 overexpressing 3T3-L1 adipocytes. GAPDH was used as a loading control. (H, I) HEK293T cells were transfected with DNA plasmids expressing FLAG-JMJD8, HA-IKK $\beta$ , and/or HA-I $\kappa$ B, and protein lysates were subjected to immunoprecipitation with anti-FLAG Ab and blotted with anti-HA or anti-FLAG antibodies. (J, K) NF- $\kappa$ B-reporter assay was performed in HEK293T cells that were transiently transfected with expression vectors of JMJD8 or control, with or without TNF $\alpha$  (10 ng/ml) treatment for 6 hours or LPS (1ug/ml) for 6 hours ( $n = 2$ ).

**Supplemental Fig. 13. JMJD8 is largely dispensable for IRF3 in mediating inflammatory gene regulation and insulin resistance.** (A) Basal and insulin-stimulated glucose uptake measured by a  $^3\text{H}$ -2-DG assay in vehicle or LPS-treated mature 3T3-L1 adipocytes that were infected with control vectors vs. shRNA against JMJD8 (JMJD8 KD), and/or IRF3 overexpressor (IRF3 OE) lentiviruses ( $n = 2, 4$ ,  $p < 0.05$ , two-way ANOVA with Student's *t*-test, mean  $\pm$  s.e.m.). (B-D) qPCR analysis of *Tnf*, *Il6*, and *Ccl2* in cells from A ( $n = 6$ ,  $p < 0.05$ , two-way ANOVA with Student's *t*-test, mean  $\pm$  s.e.m.). (E) Immunoblotting of IRF3 in the soluble and chromatin fraction of *Jmjd8* knockdown or JMJD8 overexpressing 3T3-L1 adipocytes. HSP90 was used as a loading control for the soluble fractionation, and Lamin A/C were used as a loading control for the chromatin fraction. (F) *Ccl5*-reporter assay was performed in HEK293T cells that were transiently transfected with expression vectors of JMJD8 or IRF3, and JMJD8 with IRF3 ( $p < 0.05$ , Student's *t*-test, mean  $\pm$  s.e.m.).

## Supplemental Table 1. Up- and down-regulated genes in the *Jmjd8*-KO eWAT

### Upregulated genes

|               |          |               |               |               |        |
|---------------|----------|---------------|---------------|---------------|--------|
| Rnase2a       | Col4a6   | Serpinb2      | Rab9b         | Cys1          | Spink2 |
| Sema5a        | Opn3     | Mageb18       | Tmem151a      | D430019H16Rik |        |
| Fam222a       | Egln3    | Fbxo21        | 6430573F11Rik | Apccd1        |        |
| Ces1d         | Krt19    | Ffar4         | Thrsp         | Cldn22        |        |
| Slc1a1        | Gm10532  | Adgrg2        | Cd163         | Chil1         |        |
| Msln          | Myrf     | Acsn3         | Gjb5          | Serpina3b     |        |
| Cand2         | Hepacam2 | Gapr          | Eps8l1        | 2010016I18Rik |        |
| Aff3          | Slc2a4   | Popdc2        | Peg3os        | Pck1          |        |
| Cfd           | Rbp7     | Zfp398        | Zbtb16        | Cyp2ab1       |        |
| Xpnp2p2       | Tead4    | Abca6         | Zfp366        | Tspan8        |        |
| Zfp185        | Ankrd29  | B930092H01Rik | Gsta3         | Lrrn4         |        |
| Abca8a        | Smyd1    | Ndr2          | Retnla        | Cachd1        |        |
| Lama2         | Per2     | Cbs           | Nkain4        | Fam13a        |        |
| 4930412C18Rik | Fgf11    | Krt7          | Plagl1        | Krt8          |        |
| Ppm1l         | Ms4a1    | Bnc1          | Alb           | Abcg4         |        |
| Hcar1         | Ppara    | Ccdc92        | Cybrd1        | Slc15a2       |        |
| Sesn2         | Pgf      | Eci3          | Fam214a       | Pad14         |        |
| Car3          | Hoxa7    | Omd           | Pkhd1l1       | F5            |        |
| 8430408G22Rik | Ptch2    | Nnat          | A330023F24Rik | 4732416N19Rik |        |
| Tmem154       | Gng7     | Peg3          | Krt18         | Rprml         |        |
| Retn          | Spock2   | Banp          | Ankef1        | Hspa1b        |        |
| D830031N03Rik | Acvr1c   | Ppp1r3c       | Upk3b         | Vstm2b        |        |
| Arrdc3        | Prq4     | Cd226         | Igfbbp5       | Chst4         |        |
| Dhtkd1        | Ide      | Gm19522       | Sctr          | Hspa1a        |        |
| Adrb3         | Ano1     | Gsta4         | Fmo3          | Alox15        |        |
| Usp13         | Acsn5    | Col8a2        | Lrp2          | Retnlq        |        |
| Hmgcs2        | Slit3    | Slc2a13       | Morn4         | Mylc          |        |
| Aox3          | Sult1e1  | Wnt2b         | B3galt2       | Cyp2e1        |        |
| Mcf2l         | Gpm6a    | Gdf10         | Perp          | Chga          |        |
| Agt           | Sh3d21   | Pygo1         | Igfbbp2       | Angptl7       |        |

### Downregulated genes

|          |               |           |               |         |               |               |           |          |            |        |
|----------|---------------|-----------|---------------|---------|---------------|---------------|-----------|----------|------------|--------|
| Tpsb2    | Cxcl1         | Sema4d    | H2-M2         | H2-Q5   | Ubd           | Il1rn         | Timeless  | Mdk      | Cep55      | Ptpn18 |
| Akr1b7   | 4931431B13Rik | Ms4a7     | Ccl7          | Nepn    | Oxtr          | Slc15a3       | Zbtb20    | Mcm6     | Cdt1       | Pacrgl |
| Snord123 | Tph2          | Efr3b     | Tnfrsf11a     | Oasl1   | Lrrc25        | Stambpl1      | Fkbp1b    | Ppih     | Ckb        |        |
| Cck      | Plxdc1        | Npas4     | Milr1         | Akr1cl  | Gnal          | Rn45s         | Pop7      | Cma1     | Mettl1     |        |
| Gpr50    | AU022793      | Fos       | Rhov          | Tlr1    | Ctsk          | Spdl1         | Fbln7     | Foxm1    | Gpank1     |        |
| Hpx      | Pkib          | Syng1     | Dlgap5        | Piamp   | Alpk2         | Mmp12         | Uhrf1     | Ctss     | Fblim1     |        |
| Pcp4l1   | Crisp2        | Casq1     | Rrm2          | Bcl3    | Vsig8         | Lat2          | Hck       | Kcnn4    | Adss1      |        |
| Mir3082  | Cadm1         | Ccr5      | Mcoln2        | Slamf9  | Snhg7         | Alyref2       | C5ar1     | Havcr2   | Ube2c      |        |
| Il13ra2  | Zranb3        | Cxcl14    | Cdca3         | Stap1   | Junb          | Tyrobp        | Gins1     | Tubb2b   | Pirb       |        |
| Fosb     | Ptx3          | Spc24     | H2-Q6         | Fcgr1   | Ms4a4b        | Degs2         | Gatm      | Rasgef1b | Wdhd1      |        |
| Pvalb    | Fam65c        | Clec12a   | Lat           | Evi2a   | Cd44          | Orm2          | Tpcn2     | Gpr176   | Gpr65      |        |
| Mmp3     | Galnt12       | Tnfrsf12a | 2700099C18Rik | Wisp2   | H2-Q9         | Nceh1         | Npl       | Exoc3l4  | Camk2a     |        |
| Gm5547   | Eef1a2        | Atp6v0d2  | Tuba1c        | Itgax   | H2-Q7         | Ccnb2         | Hmga1-rs1 | A4galt   | Gpr137b    |        |
| Snora70  | Hpgds         | Dusp9     | Dpep2         | Fen1    | Chchd10       | 3110039I08Rik | Arhgap25  | Rab7b    | Gpr137b-ps |        |
| Jmjd8    | Itgad         | Serpinb9b | Clec7a        | Fjx1    | Msr1          | Cd200r4       | Acer3     | Pik3ap1  | Npy1r      |        |
| S100a8   | Lair1         | Bcl2a1b   | Eif2s3y       | Fam83f  | Cd180         | Kif2c         | Slc6a6    | Pstpip1  | Cdc20      |        |
| Jchain   | Rnf128        | Tnfrsf13b | Plekhn1       | Igkap3  | Cyr61         | Mcm5          | Cd68      | Hmga1    | Lcp1       |        |
| Il1r2    | Olfr1         | Mir7653   | Adam8         | Gadd45b | Tfec          | Ms4a6d        | Stk38l    | Cstb     | Lilrb4a    |        |
| Myh15    | Rgs1          | Cd300c2   | Tm4sf19       | C3ar1   | Cd200r1       | Evl           | Casp1     | Lgals3   | Ins13      |        |
| Spp1     | Dnmt3aos      | Glipr1    | Fcgr4         | Myo1e   | Cd300lb       | Tnlp3         | Rgs18     | Aif1     | Atp14a     |        |
| Abcb4    | Cxcl10        | Tk1       | Slc37a2       | Mstn    | AA414768      | Cd84          | Ddx3y     | Lilra5   | Samd10     |        |
| Trdn     | Se1l13        | Ccl3      | Gpnmb         | Tmem144 | 2610524H06Rik | Gpr183        | Sirpa     | Sms      | Tlr6       |        |
| Cd72     | Htr2b         | Nptx2     | Pramef12      | Runx2   | 5830432E09Rik | Tgif1         | Mthfd1l   | Dcl3     | Gimap3     |        |
| Pex5l    | Trem2         | Lipf      | Rab20         | Cpa2    | Cdca5         | Neur12        | Pbk       | Cyth4    | Hk3        |        |
| Dppa3    | Ccl2          | Saa3      | Egr2          | Cdk14   | Tlr13         | Spc25         | Zc3h12d   | Cd14     | Fam64a     |        |
| Comp     | 9030619P08Rik | Il7r      | A630033H20Rik | Plppr4  | Apobec1       | Mfap2         | Pclaf     | Fignl1   | Egr1       |        |
| Ptchd1   | Cdk18         | Lcn2      | Rwdd3         | Atf3    | Birc5         | Plk2          | Clec4a2   | Ccsap    | Cd83       |        |
| Cfi      | Ccl12         | Matk      | Stra6l        | Plac8   | Rasa4         | Mrps33        | Otop1     | Cyba     | Fam134b    |        |
| Fosl1    | Prrx1         | Micall2   | Cd3g          | Lilr4b  | Cdkn3         | Socs3         | Afap1l2   | Casp4    | Ier5       |        |
| Cox6a2   | Clec4d        | H2-Q8     | Mcm10         | Gdf15   | Mcpt4         | Fam83d        | Elovl6    | Gas2l3   | Tspan33    |        |

**Supplemental Table 2. Oligonucleotide sequences used in this manuscript**

|         |                 |                           |
|---------|-----------------|---------------------------|
| Hairpin | shJmjd8 #1      | GCCTGGTTTCTCAGAGGTTAT     |
| Hairpin | shJmjd8 #2      | GGTTAACCAGAAGCTAGTTGG     |
| gRNA    | gJmjd8-human_F  | CACCGGGGCGGCAGGCTCATGGCGC |
| gRNA    | gJmjd8-human_R  | AAACGCGCCATGAGCCTGCCGCCCC |
| gRNA    | gIRF3-mouse_F   | CACCGCGAAACCGCGGATTTTGCCC |
| gRNA    | gIRF3-mouse_R   | AAACGGGCAAAATCCGCGGTTTCGC |
| qPCR    | Cyclophilin_F   | GGTGGAGAGCACCAAGACAGA     |
| qPCR    | Cyclophilin_R   | GCCGGAAGTCGACAATGATG      |
| qPCR    | Jmjd8-mouse_F   | CGGTCTGCTTTTGCTCTTTG      |
| qPCR    | Jmjd8-mouse_R   | TGAGTCCTTGCAAGATGACG      |
| qPCR    | Jmjd8-human_F   | GACAGGTTGCTGGCTTCGTT      |
| qPCR    | Jmjd8-human_R   | AGGGCAAGTCCACTTTGTGGTA    |
| qPCR    | Cxcl1_F         | GCCTATCGCCAATGAGC         |
| qPCR    | Cxcl1_R         | TGGACAATTTTCTGAACCAAG     |
| qPCR    | Cxcl10_F        | CCAAGTGCTGCCGTCATTTTC     |
| qPCR    | Cxcl10_R        | TCCCTATGGCCCTCATTCTCA     |
| qPCR    | Lcn2_F          | TCCTTCAGTTCAGGGGACAG      |
| qPCR    | Lcn2_R          | CCAGTTCGCCATGGTATTTT      |
| qPCR    | Il13ra2_F       | CGTACGCATTTGTCAGAGCA      |
| qPCR    | Il13ra2_R       | AGGTTTCCAAGAGCAGACCA      |
| qPCR    | Adgre1_F        | TGCATCTAGCAATGGACAGC      |
| qPCR    | Adgre1_R        | GCCTTCTGGATCCATTTGAA      |
| qPCR    | Mmp3_F          | CAGACTTGTCCCGTTTCCAT      |
| qPCR    | Mmp3_R          | GGTGCTGACTGCATCAAAGA      |
| qPCR    | Caspase1_F      | TCCGCGGTTGAATCCTTTTCAGA   |
| qPCR    | Caspase1_R      | ACCACAATTGCTGTGTGTGCGCA   |
| qPCR    | Il6_F           | CTCTGGGAAATCGTGGAAAT      |
| qPCR    | Il6_R           | CCAGTTTGGTAGCATCCATC      |
| qPCR    | Tnf $\alpha$ _F | ATGAGAAGTTCCCAAATGGC      |

|      |                 |                          |
|------|-----------------|--------------------------|
| qPCR | Tnf $\alpha$ _R | CTCCACTTGGTGGTTTGCTA     |
| qPCR | Il1 $\beta$ _F  | GCAACTGTTCTGAACTCAACT    |
| qPCR | Il1 $\beta$ _R  | ATCTTTTGGGGTCCGTCCAAC    |
| qPCR | Ccl2_F          | GGCCTGCTGTTACAGTTGC      |
| qPCR | Ccl2_R          | CCTGCTGCTGGTGATCCTCTT    |
| qPCR | Ccl5_F          | ACACCACTCCCTGCTGCTTT     |
| qPCR | Ccl5_R          | GACTGCAAGATTGGAGCACTTG   |
| qPCR | Spp1_F          | TCACCATTCCGGATGAGTCTG    |
| qPCR | Spp1_R          | ACTTGTGGCTCTGATGTTCC     |
| qPCR | Ptx3_F          | TGGCTGAGACCTCGGATGAC     |
| qPCR | Ptx3_R          | GCGAGTTCTCCAGCATGATGA    |
| qPCR | Cxcl13_F        | CTGGAAGCCCATTACACAAAC    |
| qPCR | Cxcl13_R        | GGGGAGTTGAAGACAGACTT     |
| qPCR | Asc_F           | CAGAGTACAGCCAGAACAGGACAC |
| qPCR | Asc_R           | GTGGTCTCTGCACGAACTGCCTG  |
| qPCR | Nlrp3_F         | TGCTCTTCACTGCTATCAAGCCCT |
| qPCR | Nlrp3_R         | ACAAGCCTTTGCTCCAGACCCTAT |
| qPCR | Cd68_F          | AGGGTGGAAGAAAGGTAAAGC    |
| qPCR | Cd68_R          | AGAGCAGGTCAAGGTGAACAG    |
| qPCR | Mgl2_F          | TTAGCCAATGTGCTTAGCTGG    |
| qPCR | Mgl2_R          | GGCCTCCAATTCTTGAAACCT    |
| qPCR | Jmjd4_F         | CCTCAAGGACTGGCATCTGT     |
| qPCR | Jmjd4_R         | GGACGTCCCAGAACTCATTC     |
| qPCR | Jmjd5_F         | CTAGTTCCTGGGAGGCCTGT     |
| qPCR | Jmjd5_R         | TGTACCTTGAGCCCACTTCC     |
| qPCR | Jmjd6_F         | CCCCTTACAGGTGGTTTGTG     |
| qPCR | Jmjd6_R         | GGTCGATGTGAATCCCAGTT     |
| qPCR | Jmjd7_F         | CCACTGATGAGGCTGGAAC      |
| qPCR | Jmjd7_R         | GCTCCTTTGGTCCTTCTTCC     |
| qPCR | Jmjd8_F         | ACTTCACTGAGTGGGCATCC     |
| qPCR | Jmjd8_R         | GCTGACAGGGCTAGAGATGG     |
| qPCR | Flh1_F          | GGCAGCTGACCTCTAACCTG     |
| qPCR | Flh1_R          | TGAGCAGGTGTCACATTTCC     |
| qPCR | Hspbap1_F       | AAATTCTGGGCTTACGCTGA     |
| qPCR | Hspbap1_R       | GTCAGACCACACCACCTCCT     |

|      |          |                            |
|------|----------|----------------------------|
| qPCR | Mina53_F | GACACACGACTTCCTGCTGA       |
| qPCR | Mina53_R | CAGGCCTGAAGGAGTTTCTG       |
| qPCR | No66_F   | CACCAAGCTGAATGTCAGGA       |
| qPCR | No66_R   | GGTGAGGTGTAGGGAGTGGA       |
| qPCR | Glut4_F  | TCATTGTCGGCATGGGTTT        |
| qPCR | Glut4_R  | CGGCAAATAGAAGGAAGACGT      |
| qPCR | Pparg_F  | CAAGAATACCAAAGTGCGATCAA    |
| qPCR | Pparg_R  | GAGCTGGGTCTTTTCAGAATAATAAG |
| qPCR | Fabp4_F  | AAGGTGAAGAGCATCATAACCCT    |
| qPCR | Fabp4_R  | TCACGCCTTTCATAACACATTCC    |
| qPCR | Adipoq_F | TGTTCTCTTAATCCTGCCCA       |
| qPCR | Adipoq_R | CCAACCTGCACAAGTTCCCTT      |
| qPCR | Leptin_F | GAGACCCCTGTGTCGGTTC        |
| qPCR | Leptin_R | CTGCGTGTGTGAAATGTCATTG     |
| qPCR | Arg1_F   | CTCCAAGCCAAAGTCCTTAGAG     |
| qPCR | Arg1_R   | AGGAGCTGTCATTAGGGACATC     |
